# Supplementary material for: Exploring MicroRNA-Like Small RNAs in the Filamentous Fungus Fusarium oxysporum
Source: PLoS One. 2014 Aug 20;9(8):e104956. doi: 10.1371/journal.pone.0104956 (PMC4139310; doi:10.1371/journal.pone.0104956)
Supplement: Figure S6 — Alignments between milRNA candidates and precursors passing miRCheck. (DOC) [file pone.0104956.s006.doc]

Supplemental Fig. S6
Align_output_of_miRNA_candidates_passed_MIRcheck (Linux_txt_format)

>supercont2.1+_candidate_101_start_746080_stop_746392_length_313nt_hairpin_18_135_118nt_mappedmax_1 map_smallRNA_1
ACGAUUGCUCUGGUGUUACUGACGCAUGCUGAAAAUCCUCCGAGGUUGCGGUUGACUUCCGCCUGUUAAACGCAACACCGAAUCUAGGCAUGUAGAAGGUAUAAUAAUAGAAUAUCGG
.((((...((((.(((((((...(((((((..........((..((((((.(((((........))))).))))))..))......)))))))....))))..))).))))..)))). (-33.49)
...................................................................................................TATAATAATAGAATATCGG	fox_19nt_0022515_0000002 + 100

>supercont2.1+_candidate_104_start_776174_stop_776575_length_402nt_hairpin_23_376_354nt_mappedmax_1 map_smallRNA_1
AUGGCUUUCUUCCCUCGCAACUUCUACAACUCCGAUGCUUCCUUUACUCCCCUCUUCCGUCUCCUCGACGACUUCGAUAGCUACUCUCGUCAGGGACAACAGAACGGUGGUACUCGCCGAAGCGGCCUCACCCACUGGCAGCCCAAGUUCGAUGUCCGCGAGACUGGCGAAGCCUACGAGCUCCAUGGAGAGCUCCCCGGCAUGACCAAGGACAACGUUCACAUCGAAUUCACUGAGCCUCAGACCAUGACCAUCCGCGGCAAGACUGAGCGCACAUACACUGCCGGCACUCCUCCCGCUGGCCUCGUCGAGGGCUCUCAGUCCCAAGGCGCCAUUGCUGAGGGCGAGGGCAAC
...((((((..(((((((((................(((((...(((..((.(((...(((.(((.(((((...............)))))))))))...)))..))..)))......))))).((((.....(((((.(((((.((((((((((..(((...((((((..(((...((((((......))))))...))).)).)).)).....)))..))))))))))......(((((((..(.((.((......)))).).))))).)).........((((((.........))))))........))))).)))))....))))....)))).))))).))))))... (-115.26)
...............................................................................................................................................................................................................................................................................................................................................TGCTGAGGGCGAGGGCAAC	fox_19nt_0036187_0000001 + 336

>supercont2.1+_candidate_105_start_776433_stop_776683_length_251nt_hairpin_65_125_61nt_mappedmax_2 map_smallRNA_3
GCCUCGUCGAGGGCUCUCAGUCCCAAGGCGCCAUUGCUGAGGGCGAGGGCAACGAUGAGAA
..(((((((...((((((.((((...((((....))))..))))))))))..))))))).. (-29.30)
..................................TGCTGAGGGCGAGGGCAAC........	fox_19nt_0036187_0000001 + 35
.......................................AGGGCGAGGGCAACGATGAG..	fox_20nt_0034362_0000001 + 40
...........................................CGAGGGCAACGATGAGAA	fox_18nt_0046928_0000001 + 44

>supercont2.1+_candidate_109_start_785692_stop_785951_length_260nt_hairpin_32_193_162nt_mappedmax_2 map_smallRNA_2
UAUCCGAAAGGUAGGACAUAGCAUCACACCGUCUCUUUUUCCGACUCUUACUAAUUGCCCUAGUUCCUUGACGGUCUGUACGUCUCCGAGAAGGGCAACAUUGUCCAGGACGAAUAAGCGCGGGUACGGACACGGAUCUUGUUUCUUUUGCGUUUCUGGGUC
.((((((((.((((((...((((.....((((.(((...((((.(.((((....(((((((..(((...((((.......))))...))).)))))))..(((((...))))).)))).)))))...))).))))....))))..)))))).)))).)))). (-49.20)
....................................................................................................................AGCGCGGGTACGGACACG............................	fox_18nt_0024083_0000001 + 117
.............................................................................................................................................TTTCTTTTGCGTTTCTGGGTC	fox_21nt_0103871_0000001 + 142

>supercont2.1+_candidate_142_start_1191233_stop_1191449_length_217nt_hairpin_38_105_68nt_mappedmax_1 map_smallRNA_1
CUUCUGGGUCGAGCCAGCUGAACUCAGCCUACUCACAGAGGCCGAGGUAGCUGAUCUUCGCCUAGAAC
.((((((((.(((.((((((..(((.((((........)))).))).))))))..))).)))))))). (-30.00)
................................................AGCTGATCTTCGCCTAGAAC	fox_20nt_0061104_0000001 + 49

>supercont2.1+_candidate_154_start_1331617_stop_1331840_length_224nt_hairpin_13_213_201nt_mappedmax_3 map_smallRNA_3
GAAAGGAGGUCGGGCAGAACAAGAACCUAGCCCUUUUACUAUUUAACGACAUUUAGCAUGAGAAGAACAAAAUCAAAAAUCUACACAGAUAUGUAGUCGGGACGGGAUCAUAACUAUCUAGUUUUAACCUAGACAUGGUUGAUAGAAACGAUGUCUUUAAUUGGCCGGAAGAAAAAAAUGUUUAAUUGUUUACUUUUUGCA
..(((((.((((..........((.(((..(((..(((((((((.....(((.....)))....((......))............))))).))))..)))..))).)).......((((...((((((.......))))))))))..)))).))))).....((..((((.(((.(((.....))).))).))))..)). (-37.80)
GAAAGGAGGTCGGGCAGAA......................................................................................................................................................................................	fox_19nt_0033609_0000001 + 1
.......................................................................................GATATGTAGTCGGGACGGG...............................................................................................	fox_19nt_0066967_0000001 + 88
.........................................................................................TATGTAGTCGGGACGGGAT.............................................................................................	fox_19nt_0061774_0000001 + 90

>supercont2.1+_candidate_160_start_1419774_stop_1419998_length_225nt_hairpin_60_121_62nt_mappedmax_2 map_smallRNA_2
UUGGACGAUGUCGUCGAUGCCAACCGUCGACGUGUGGCCCUGGCUCUGAACGACAUUGACGA
.....(((((((((((..((((...((((.....))))..))))..)).))))))))).... (-21.60)
........................................TGGCTCTGAACGACATTGACG.	fox_21nt_0060104_0000001 + 41
............................................TCTGAACGACATTGACGA	fox_18nt_0034298_0000001 + 45

>supercont2.1+_candidate_185_start_1674737_stop_1674946_length_210nt_hairpin_26_126_101nt_mappedmax_1 map_smallRNA_1
ACUUUUCAAGUCGAGGCCAAGUUUCCCGGUUAAUGAAUCGACACGACGAUGGACCAACAACAUUUCGGAUCCGAUACAGAGCUGGGCUACGACUGAAGAGC
.(((((((.((((.((((.(((((...((((.....((((......)))).)))).........(((....)))....))))).)))).))))))))))). (-33.60)
...............................................................................AGCTGGGCTACGACTGAAGAGC	fox_22nt_0083307_0000001 + 80

>supercont2.1+_candidate_191_start_1713888_stop_1714113_length_226nt_hairpin_89_215_127nt_mappedmax_1 map_smallRNA_1
UGCUCGUCAAGUCUGAUCUCUACACAUUGAAGCACGGCCAGCUUCAAAUGAGUGCCGCUCGCUUCGGUGACGCACCCCUGAUCAAGCUUGGUGGUGACUUCAAGAAGGUCUCAGACUUCCAGAAGCG
.((((...((((((((..(((.....(((((((((.((((((((.....(.((((.(.((((....))))))))).)......)))).)))).))).))))))..)))..))))))))...).))). (-47.80)
...........................................................................................................GTCTCAGACTTCCAGAAGCG	fox_20nt_0073867_0000001 + 108

>supercont2.1+_candidate_202_start_1781907_stop_1782113_length_207nt_hairpin_42_117_76nt_mappedmax_1 map_smallRNA_1
UAUCACAGCUACGACCAAUCUUGCACUCGCCGAACAAACCCUCAAAGAACUACCAGGAUGUGUUUUGGCAGUGAAC
..((((.((((.(((..((((((...((...((........))...)).....))))))..))).)))).)))).. (-15.60)
.........................................................ATGTGTTTTGGCAGTGAAC	fox_19nt_0077747_0000001 + 58

>supercont2.1+_candidate_216_start_1820672_stop_1820877_length_206nt_hairpin_21_118_98nt_mappedmax_1 map_smallRNA_1
UGACUUGCCUUCUGAGUCUGACUUACCGAACAAGUAUCCAAGACUUUUGGACUCCGCCUGCGCCUGCGGUUUAGUCGAUCACUCCCAGGUUGCAAUCA
.((.((((..(((((((.(((((.((((.....(((((((((...)))))).......))).....))))..)))))...))))..)))..)))))). (-23.71)
...............................................................................CACTCCCAGGTTGCAATCA	fox_19nt_0043621_0000001 + 80

>supercont2.1+_candidate_254_start_1951728_stop_1951948_length_221nt_hairpin_98_177_80nt_mappedmax_1 map_smallRNA_1
UGCAAUGGACUGCCGGCAUUCGACUAGCUAUUUUCGAGCACUCCUCUCUGCAGGAGGCCUAUACUGGCGCUCUAAUUGCC
.((((((((.((((((...((((..(....)..))))((.(((((......))))))).....)))))).))).))))). (-25.30)
TGCAATGGACTGCCGGCA..............................................................	fox_18nt_0020457_0000001 + 1

>supercont2.1+_candidate_259_start_1954534_stop_1954758_length_225nt_hairpin_78_142_65nt_mappedmax_1 map_smallRNA_1
UCGCGGGGUGCUAGUUCGACCUUGAACUUUGCAAGCUCUGGGGAGACAUCUAGCCACCUCAGUGC
.(((((((((((((.((..(((.((.((.....)).)).)))..))...)))).)))))).))). (-23.10)
...............................................ATCTAGCCACCTCAGTGC	fox_18nt_0016133_0000001 + 48

>supercont2.1+_candidate_268_start_1981378_stop_1981666_length_289nt_hairpin_98_189_92nt_mappedmax_8 map_smallRNA_8
CAUUUCGUGAUGAGUUGUUUUUUUUAGUAUUCACACUGUUUGACUCUUGGUCUUCGGACCUUGGGAUAUGAACACAACAUCAACAUCUGAUU
.(((..(((.((((((((.(((..((((......)))).....(((..((((....))))..)))....))).))))).))).)))..))). (-21.90)
..TTTCGTGATGAGTTGTTT........................................................................	fox_18nt_0002010_0000018 + 3
..TTTCGTGATGAGTTGTTTT.......................................................................	fox_19nt_0003998_0000011 + 3
..TTTCGTGATGAGTTGTTTTT......................................................................	fox_20nt_0005588_0000010 + 3
...TTCGTGATGAGTTGTTTT.......................................................................	fox_18nt_0029865_0000001 + 4
........................................................................CACAACATCAACATCTGAT.	fox_19nt_0012398_0000003 + 73
........................................................................CACAACATCAACATCTGATT	fox_20nt_0011276_0000004 + 73
.........................................................................ACAACATCAACATCTGATT	fox_19nt_0022604_0000002 + 74
..........................................................................CAACATCAACATCTGATT	fox_18nt_0009368_0000002 + 75

>supercont2.1+_candidate_276_start_2007509_stop_2007719_length_211nt_hairpin_107_179_73nt_mappedmax_1 map_smallRNA_1
GCCUGAUCGUCUGCGGUCUCGGAAUGCUGUUCCUUUGCCCUGACAGCCCCAUGGGAUCGUGGGAGGAUCAGGC
((((((((.((..((((((((....((((((..........))))))....))))))))..))..)))))))) (-36.50)
...................................................TGGGATCGTGGGAGGATCAGGC	fox_22nt_0028612_0000002 + 52

>supercont2.1+_candidate_277_start_2007587_stop_2007814_length_228nt_hairpin_29_101_73nt_mappedmax_1 map_smallRNA_1
GCCUGAUCGUCUGCGGUCUCGGAAUGCUGUUCCUUUGCCCUGACAGCCCCAUGGGAUCGUGGGAGGAUCAGGC
((((((((.((..((((((((....((((((..........))))))....))))))))..))..)))))))) (-36.50)
...................................................TGGGATCGTGGGAGGATCAGGC	fox_22nt_0028612_0000002 + 52

>supercont2.1+_candidate_292_start_2219645_stop_2219868_length_224nt_hairpin_21_86_66nt_mappedmax_1 map_smallRNA_1
CUUGGCUUCGAGGCGUACGAGGUCUUUGGUGGUAUGCGAGGAAAGCGAUAUGCCCUCAAGGUGGAG
(((.((((.((((((((((...((((((........))))))...)).)))).)))).)))).))) (-23.30)
CTTGGCTTCGAGGCGTACG...............................................	fox_19nt_0053112_0000001 + 1

>supercont2.1+_candidate_2_start_456_stop_659_length_204nt_hairpin_43_128_86nt_mappedmax_3 map_smallRNA_2
GGGGUUAUACUGGUGGUGCUGGAUUCAUCCAAGCGCUUGCAGCUGGAUACUUCCUCUGGGAUUUAGUAGUCACCAGCAUUAACCUC
(((((((..((((((((((((((((((((((.((.......)))))))..........)))))))))).)))))))...))))))) (-33.70)
.........................................................GGGATTTAGTAGTCACCAGC.........	fox_20nt_0098981_0000001 + 58
...................................................................AGTCACCAGCATTAACCTC	fox_19nt_0079195_0000001 + 68

>supercont2.1+_candidate_311_start_2489054_stop_2489255_length_202nt_hairpin_40_117_78nt_mappedmax_1 map_smallRNA_1
UCUCUUGGCUAUUCCUCUGAUUGUCCUCGCCGCCAUUGGCAAGAAGGAUGGCAUUCCUGUCGGUAAAUGGAACGGAGA
(((((...(((((...(((((....((.((((....)))).)).((((......)))))))))..)))))...))))) (-20.10)
............................................................CGGTAAATGGAACGGAGA	fox_18nt_0018110_0000001 + 61

>supercont2.1+_candidate_320_start_2587769_stop_2587979_length_211nt_hairpin_97_160_64nt_mappedmax_1 map_smallRNA_1
AUGGGACACGAUGAGCAUUAACAAACACGAUAGAGGAUACACGACGUGCUGGCGUUGUUGGCGU
....((((((.(.(((((.........(......)..........))))).))).))))..... ( -8.61)
ATGGGACACGATGAGCAT..............................................	fox_18nt_0015082_0000002 + 1

>supercont2.1+_candidate_336_start_2746561_stop_2746827_length_267nt_hairpin_14_144_131nt_mappedmax_1 map_smallRNA_1
CCGAGGUGAGGGUCACGAUCUCUCCGGUCAAGAUGUGCCCUUGAACGAUGGCAGCUCCUGGACUGCUCGGGACCGUGAUCUCGACAGCGACGAGGAAGAGGAAGAGGAGGAUGCCCGAGGCUCCAUUCUGG
(((..(((.(((((.(((((.((((..((......((((.((....)).))))..((((.(.(((.((((((......)))))))))...).))))....))...)))))))...)).))))))))..))) (-43.00)
CCGAGGTGAGGGTCACGATCTCT............................................................................................................	fox_23nt_0024276_0000001 + 1

>supercont2.1+_candidate_337_start_2746699_stop_2746924_length_226nt_hairpin_123_180_58nt_mappedmax_1 map_smallRNA_1
ACGAGAGUGUGUGUUGCUUUCCUCACGUUCGGUAGUAAUGAUGGGAACGCAAUCUUGG
.(((((...((((((.((.((...((........))...)).)).)))))).))))). (-16.10)
ACGAGAGTGTGTGTTGCT........................................	fox_18nt_0027081_0000001 + 1

>supercont2.1+_candidate_352_start_2817943_stop_2818151_length_209nt_hairpin_30_84_55nt_mappedmax_1 map_smallRNA_1
UUCCCGAUAAAUGCAUAAUGCUGUUAGGAAUUGCAGCAGUGUAGAUAUCUUGGAG
.(((.((((..(((((..((((((........)))))))))))..))))..))). (-17.90)
....................................CAGTGTAGATATCTTGGAG	fox_19nt_0044598_0000001 + 37

>supercont2.1+_candidate_355_start_2850139_stop_2850416_length_278nt_hairpin_118_172_55nt_mappedmax_1 map_smallRNA_1
AUAUUGGAGCUGUCUGAAUUUCUUUGCUGAAAAGACACUUUAUACGCUUUUUUAU
(((..(((((.((.((((..(((((.....)))))...)))).)))))))..))) ( -9.10)
ATATTGGAGCTGTCTGAAT....................................	fox_19nt_0062321_0000001 + 1

>supercont2.1+_candidate_363_start_3007295_stop_3007513_length_219nt_hairpin_51_122_72nt_mappedmax_3 map_smallRNA_3
CCUUCCCUCUCUAAUCAGACGAGCUCAGGUGGCUAUUGACACACUGAAGCCUCUCUCUGAUAAGACGGAAGC
.(((((...(((.((((((.(((((((((((........))).))).)).)))..)))))).))).))))). (-25.80)
...............................................AGCCTCTCTCTGATAAGACGGA...	fox_22nt_0073250_0000001 + 48
.................................................CCTCTCTCTGATAAGACGGA...	fox_20nt_0039674_0000001 + 50
..................................................CTCTCTCTGATAAGACGGAAGC	fox_22nt_0019573_0000002 + 51

>supercont2.1+_candidate_366_start_3011280_stop_3011547_length_268nt_hairpin_85_241_157nt_mappedmax_1 map_smallRNA_1
ACGACGACGAGGACAUGUAUGGGGACGAGUAUGACGAUGAGAUGGAUUAUGGAGACGACGACAUUUCGGACGAAGAAGAUAAUAUCAGUGACGAUGACGAAGAACUUGGCGAAAUGGGCGAAAUUGAAGGUCUCCAUGGCGAGCCGGGCGUUGUCGA
.((((((((.((.(.(((((((((((........((.(((((((.....((....))....)))))))..))............(((((..((....))......(((.(......).))).)))))..)))))))).))).)))...)))))))). (-43.50)
ACGACGACGAGGACATGTATG........................................................................................................................................	fox_21nt_0083872_0000001 + 1

>supercont2.1+_candidate_380_start_3094756_stop_3094984_length_229nt_hairpin_8_221_214nt_mappedmax_1 map_smallRNA_0
UAUGAUAGUGUACGGAGUUGAAACACAUCGACACUCGUCUUUGUUGAUGACACAGGCUUCUCUCACCCUUUCCUUGGUGAUUCCCGAGAAUCAACGAGAAUUGCAGGCAAAACAUGAAACUCGACGAAAAGUAUAUCUCUUACCUGUCGCAGCUCCUCUAGCACUGAUUCUUCAACGCCGCUCUCCUCGAAAUCAACUCGCGAACUAUUGACAA
...((((((...(((((((((....((((((((........)))))))).....((.((((((((((........))))).....)))))))..((((....((.(((.............(((((..(((.......)))...)))))..(((.....)))..............)))))....))))...))))))).)).))))))..... (-52.60)

>supercont2.1+_candidate_382_start_3095145_stop_3095435_length_291nt_hairpin_64_193_130nt_mappedmax_2 map_smallRNA_8
GCAAACCCGUUCUUCAGAAGAGACCUGAAAAGGACCUUUUGACGAAGAGAUAUUGUAGUGCGGAUGUUGUUGCUGCAGUGCUCGAUAAAUGCACUUGAUGUAGAUGUAAAUUCGGCACUUAGCCACGGCG
......((((((.(((((((.(.(((....))).)))))))).))..............))))..(((((.((((.(((((.(((....((((((......)).))))...)))))))))))).))))). (-38.83)
....................................TTTTGACGAAGAGATATTGT..........................................................................	fox_20nt_0028143_0000002 + 37
.....................................TTTGACGAAGAGATATTGT..........................................................................	fox_19nt_0046461_0000001 + 38
................................................................TGTTGTTGCTGCAGTGCTCGA.............................................	fox_21nt_0060611_0000001 + 65
..............................................................................................TTGATGTAGATGTAAATTCGG...............	fox_21nt_0021648_0000002 + 95
..............................................................................................TTGATGTAGATGTAAATTCGGC..............	fox_22nt_0084564_0000001 + 95
...............................................................................................TGATGTAGATGTAAATTCGG...............	fox_20nt_0019611_0000002 + 96
...............................................................................................TGATGTAGATGTAAATTCGGC..............	fox_21nt_0003058_0000024 + 96
..................................................................................................TGTAGATGTAAATTCGGC..............	fox_18nt_0045870_0000001 + 99

>supercont2.1+_candidate_42_start_278370_stop_278589_length_220nt_hairpin_99_153_55nt_mappedmax_1 map_smallRNA_1
ACAGUGGAUCUUGGGAGUUGGGCGGCCGCAACUUGCCCAUUCUCAACCGCCCUGU
((((.((...((((((((.((((((.......))))))))))))))...)))))) (-22.60)
ACAGTGGATCTTGGGAGTTGGGC................................	fox_23nt_0029917_0000001 + 1

>supercont2.1+_candidate_437_start_3998636_stop_3998844_length_209nt_hairpin_129_200_72nt_mappedmax_2 map_smallRNA_2
AAGGAGCAGGAAUCGAGGCAUUGGCGAUGGCAGGAUGUUAUUAGCAUUUCCAAGCGUCGGUUCUUGUUCCGA
..((((((((((((((.((.((((.((((...............)))).)))))).)))))))))))))).. (-33.36)
................................................TCCAAGCGTCGGTTCTTGTTCCGA	fox_24nt_0019626_0000001 + 49
.................................................CCAAGCGTCGGTTCTTGTTC...	fox_20nt_0073459_0000001 + 50

>supercont2.1+_candidate_58_start_348687_stop_348932_length_246nt_hairpin_39_223_185nt_mappedmax_1 map_smallRNA_1
CAGUUGUGACGAUACGGUUUAUUUUUUCCCCCAUGGGAUAAGGCGAAGCACUUGAGUUUUAUUACGGAAUGGUACAUUAGCAAACGGAACUGUACGAGGCGUUGGCAGGUUAGGCCUUGUGUAGCCAACCCUUUUGGGGGUAUCCUUGAGGAGCAGGGCAGAGGAUGGAUCUACCACCACGAUCA
..((((((..(.((.((((((((((((((((((.(((....(.(((.((.(((((((((..((....((((...))))....))..)))))...)))))).))).).(((((.((...)).)))))..)))...))))))...(((((.....))))).)))))))))))))).)..)))))).. (-53.20)
CAGTTGTGACGATACGGT.......................................................................................................................................................................	fox_18nt_0044634_0000001 + 1

>supercont2.1+_candidate_60_start_349096_stop_349314_length_219nt_hairpin_34_119_86nt_mappedmax_1 map_smallRNA_1
UGCUCUCUGGCUUUUGUUUGUCCGACUGAUCCUCUUUCAUAGCUACAAUAAUGUAUCCCACAAGGACGACAUUGGCCAAGACAGCA
.(((.(((((((..((((.((((...(((.......)))....((((....))))........))))))))..)))).))).))). (-25.10)
..................................................................CGACATTGGCCAAGACAGCA	fox_20nt_0054136_0000001 + 67

>supercont2.1+_candidate_65_start_373958_stop_374185_length_228nt_hairpin_29_122_94nt_mappedmax_3 map_smallRNA_3
AUUCUUGAGGCCAAGUAUUCAUGUUCUGAUGCCCGGGGUGGGCGUUGGCGGACAAAGGUCCUAUUUUUGUAUUGAGUCAGUUGGAUUGGAGAUG
..((((.((.((((.((((((....(..((((((.....))))))..).((((....))))...........))))).).)))).)).)))).. (-29.60)
......................................................................ATTGAGTCAGTTGGATTG......	fox_18nt_0050549_0000001 + 71
........................................................................TGAGTCAGTTGGATTGGAGA..	fox_20nt_0082133_0000001 + 73
..........................................................................AGTCAGTTGGATTGGAGATG	fox_20nt_0088089_0000001 + 75

>supercont2.1+_candidate_85_start_551460_stop_551659_length_200nt_hairpin_48_121_74nt_mappedmax_1 map_smallRNA_1
GAUCUCUUACCCUCUCUCCUCAGAUCCUCGUCGAGAAGUCGCUCAAGGGCUGGAAGGAAGUAGAAUACGAGGUC
((((((.((..((((.(((((((.((((.(.(((....)))..).)))))))..)))))).))..)).)))))) (-19.60)
....................................................GAAGGAAGTAGAATACGAGGTC	fox_22nt_0017857_0000002 + 53

>supercont2.1+_candidate_90_start_594900_stop_595125_length_226nt_hairpin_25_115_91nt_mappedmax_2 map_smallRNA_2
GGGGACAGAUUUCUAUUGCCGAUGUAAACGAGGUCUACAACCGUCAGGAUAACUCCACCCGACCACCAGCUCGGCGAGUAGAAACUGACCC
.(((.(((.(((((((((((((.((....(((((.....))).)).(((....)))............))))))).))))))))))).))) (-29.40)
......................................................................TCGGCGAGTAGAAACTGACC.	fox_20nt_0032356_0000002 + 71
......................................................................TCGGCGAGTAGAAACTGACCC	fox_21nt_0093690_0000001 + 71

>supercont2.1+_candidate_95_start_640483_stop_640758_length_276nt_hairpin_32_121_90nt_mappedmax_1 map_smallRNA_1
UCCCUCUGUUCGACAUUUCCGCCCUCAUCAUACUCCAACUCGAGUAUAUCGCCGCUUUACUUGAGGCUCGGACAAUGACCGGACAUGGGC
.(((..((((((.((((((((.(((((..((((((......))))))..............)))))..)))).))))..)))))).))). (-26.79)
.....................................................................GGACAATGACCGGACATGGGC	fox_21nt_0106885_0000001 + 70

>supercont2.1+_candidate_96_start_640719_stop_641023_length_305nt_hairpin_26_226_201nt_mappedmax_1 map_smallRNA_1
UUCAUGAUCUCGUCGUGGCACAGAUCGAUAUGAAAGUCGAUUCGACACGAGUACCAUAGGUCGGAUGGACUGAGCUAUGCGACAGGAAUCUUGAGGACGGUACAUAUUUCCCCUUUUUCUUCUUUUUCUUUUCUUUGUUAUUGCAAGUGGCAGAUAUGAAUUUUGACCACAGGAAACGGUUUCACACGACGGGGUUAUGCA
..(((((((((((((((.....(((((((......))))))).((.((..(((((....((((.((((......)))).)))).....((.....)).)))))...(((((.......................((((....))))((((((((.......)))).)))).)))))..)).)).))))))))))))))).. (-60.00)
TTCATGATCTCGTCGTGGC......................................................................................................................................................................................	fox_19nt_0061276_0000001 + 1

>supercont2.1+_candidate_9_start_111033_stop_111304_length_272nt_hairpin_32_138_107nt_mappedmax_1 map_smallRNA_1
CGGUGCUCAGGGCGUCUUCUUCAACAGUCUGUUUGUGUCCUAUCUGAUCUCGCCCAAGAUUGUCCACAGGUUUGUCGGUUACCUUGAAGAAGAGGCUGUUCACACCU
.((((...(.(((.((((((((((....(((((((((..(.((((...........)))).)..)))))).....))).....)))))))))).))).)...)))). (-33.40)
......................................................................................AAGAAGAGGCTGTTCACACCT	fox_21nt_0056873_0000001 + 87

>supercont2.1-_candidate_113_start_794384_stop_794104_length_281nt_hairpin_100_202_103nt_mappedmax_2 map_smallRNA_2
CGCAACAUCGUCUCCUCGACGGUGCCGGUAACAUCCAAAACUGGCGCCACGAUCAUCUCAGUCUUCCCACAGUUGGUCACCACUUGAAGGGGAGGCCGUUGCU
.(((((...((((((((...(((((((((..........)))))))))..(((((.((..((......)))).)))))..........)))))))).))))). (-39.80)
CGCAACATCGTCTCCTCG.....................................................................................	fox_18nt_0040460_0000001 + 1
.GCAACATCGTCTCCTCGA....................................................................................	fox_18nt_0005666_0000005 + 2

>supercont2.1-_candidate_114_start_799743_stop_799539_length_205nt_hairpin_69_193_125nt_mappedmax_1 map_smallRNA_1
CGGUACCAACGAAACAUUUACUGAGGAUCUCGGCACAUUGAACGUAUACGACAUUGCCAAUUCCGAAUGGUUCCAUCAAGAAACGUCCGGAGAUACACCCAGCGUUCGUGUUAAUCCUUGUGCCG
((((((.((.(((((((...(((.((.....((((...((..((....)).)).))))..(((((.(((.(((......))).))).))))).....))))).....)))))..)).)))))))) (-29.30)
..........................................................................................................CGTGTTAATCCTTGTGCCG	fox_19nt_0049117_0000001 + 107

>supercont2.1-_candidate_127_start_893052_stop_892827_length_226nt_hairpin_11_113_103nt_mappedmax_1 map_smallRNA_1
UCCAUUGUCGGCGCCAAGACUGUUGAGGAGUUCGUCAGCAAGCUCAAGUCUCCUCGCCGUGUCAUGCUCCUGGUCCAGGCUGGUCAGGCUGUCGACGACUGGA
(((((((((((((((..(((((.(((((((..(...((....))...).))))))).)).)))......(..((....))..)...))).)))))))).)))) (-39.50)
...................................................................................TCAGGCTGTCGACGACTGGA	fox_20nt_0044467_0000001 + 84

>supercont2.1-_candidate_133_start_966824_stop_966452_length_373nt_hairpin_199_269_71nt_mappedmax_6 map_smallRNA_6
UGCAGGCCCGCCCUACCAUCGUCUGGUUUUGGUGUUUUCACACAUCUUAGUCGUGGUUGGGAGGCAGGACA
..(..(((..(((.((((.((.((((...(((((....))).))..)))).)))))).))).)))..)... (-24.10)
....GGCCCGCCCTACCATCGT.................................................	fox_18nt_0042903_0000001 + 5
....GGCCCGCCCTACCATCGTCT...............................................	fox_20nt_0077790_0000001 + 5
......CCCGCCCTACCATCGTCT...............................................	fox_18nt_0018213_0000001 + 7
...................................................CGTGGTTGGGAGGCAGGA..	fox_18nt_0015206_0000002 + 52
....................................................GTGGTTGGGAGGCAGGAC.	fox_18nt_0052049_0000001 + 53
.....................................................TGGTTGGGAGGCAGGACA	fox_18nt_0053781_0000001 + 54

>supercont2.1-_candidate_135_start_1015842_stop_1015630_length_213nt_hairpin_53_146_94nt_mappedmax_1 map_smallRNA_1
AUCAAGGUUAGGGACAUAUGCUGAUAUAACCCAUAUGGAAACGUCAGUGAAGAACUUCAAUGACUGUAACUGGAGCGAAUGUCGUUGAUCUGAU
((((.((((((.(((((.((((........((....))....((((.((((....)))).)))).........)))).))))).)))))))))) (-27.60)
.........................................................................AGCGAATGTCGTTGATCTGAT	fox_21nt_0069405_0000001 + 74

>supercont2.1-_candidate_180_start_1215270_stop_1215053_length_218nt_hairpin_99_192_94nt_mappedmax_2 map_smallRNA_2
GAAGGAGGUCAACAGCAGCCGUGCCGCCGACCAGAAGGCCAUCGACAAGGCUCUGAUUGCCAACAUCAAGAAGGUUGACAUGCUGGCUUCUUAC
..(((((((((.((.(((((.....(((........))).........(((.......)))...........)))))...)).))))))))).. (-29.10)
GAAGGAGGTCAACAGCAGC...........................................................................	fox_19nt_0023658_0000002 + 1
.AAGGAGGTCAACAGCAGCC..........................................................................	fox_19nt_0067514_0000001 + 2

>supercont2.1-_candidate_184_start_1221007_stop_1220763_length_245nt_hairpin_99_231_133nt_mappedmax_1 map_smallRNA_1
UUUCGACCGACUGUGGGGGAAGAAGGAGAUGCGAAUUCUGAUGGUUGGUCUUGAUGCCGCCGGUAAAACCACCAUCCUCUACAAGCUUAAGCUUGGUGAGAUUGUCACCACCAUUCCCACUAUCGGUAUGAGA
((((((((((..(((((((.....((.(((.........((((((.(((.....((((...))))..)))))))))(((..(((((....)))))..)))...))).))....)))))))..))))).))))) (-44.50)
TTTCGACCGACTGTGGGGGA.................................................................................................................	fox_20nt_0070491_0000001 + 1

>supercont2.1-_candidate_18_start_98938_stop_98631_length_308nt_hairpin_12_184_173nt_mappedmax_1 map_smallRNA_1
UUGUUGGAGAUGACCUGACUGUCACCAACCCCCUGCGAAUCAAGAAGGCCAUCGAGCUCAAGUCUUGCAACGCCCUUCUUCUCAAGGUCAACCAGAUUGGUACUCUGACCGAGUCCAUCCAGGCUGCUAAGGACUCCUACGCUGAUGGCUGGGGUGUCAUGGUCUCUCACCGA
......((((.((((((((........(((((..............(((((((.(((...(((((((((..(((......(((..((((((((.....)))....))))))))........))))))..)))))).....))))))))))))))))))).))))))))..... (-55.77)
TTGTTGGAGATGACCTGA...........................................................................................................................................................	fox_18nt_0041459_0000001 + 1

>supercont2.1-_candidate_201_start_1387397_stop_1387170_length_228nt_hairpin_52_123_72nt_mappedmax_2 map_smallRNA_2
UGCGGGUAGUAAGGAUUGUUACCCUGAAGCCUCAAUCUCCACUGAUCGUGGUGACAACUGGAAGACUCUGCA
.((((((..(..((.((((((((.(((....(((........)))))).))))))))))..)..)).)))). (-20.10)
................................................TGGTGACAACTGGAAGACTCTGC.	fox_23nt_0015321_0000002 + 49
..................................................GTGACAACTGGAAGACTCTGCA	fox_22nt_0066253_0000001 + 51

>supercont2.1-_candidate_227_start_1801832_stop_1801477_length_356nt_hairpin_66_190_125nt_mappedmax_2 map_smallRNA_2
AACUCCUACAGUGCCCAGCUUGGGCCUGCAUCAUCAUUGAAAAGAACUAAGCAGGACGGGCCAAUGUGGCCCGAUCAACCACCACUAACAGAAGGAGGAGGGACCAGGAAGGCAUAUGUAGAGAC
..(((.(((((((((...(((((.(((((....((........)).....))))).((((((.....)))))).....((.((.((......))..)).))..)))))..))))).))))))).. (-44.80)
........................................................................................................CAGGAAGGCATATGTAGAGA.	fox_20nt_0105269_0000001 + 105
.........................................................................................................AGGAAGGCATATGTAGAGAC	fox_20nt_0105798_0000001 + 106

>supercont2.1-_candidate_231_start_1803537_stop_1803130_length_408nt_hairpin_230_312_83nt_mappedmax_2 map_smallRNA_2
CGAUGUCAAGGCUGUCGGCAUGUCUCAGGCUGCCAUUUGGGGCGUUCUCGAUGGCGAACUGAUUACCGACUUCCCCGAUAUUU
.((((((..((..(((((......((((..(((((((.(((.....))))))))))..))))...)))))..))..)))))). (-30.30)
CGATGTCAAGGCTGTCGGC................................................................	fox_19nt_0054972_0000001 + 1
.GATGTCAAGGCTGTCGGC................................................................	fox_18nt_0019514_0000001 + 2

>supercont2.1-_candidate_232_start_1803822_stop_1803615_length_208nt_hairpin_84_140_57nt_mappedmax_1 map_smallRNA_1
AAUGCGACUAUCAGAUACUUUACUAAAACAAGGUGUUCGUGUCUUCGAUAUCGCAUU
(((((((.((((((((((..((((.......))))...))))))..))))))))))) (-17.30)
AATGCGACTATCAGATACTTTACT.................................	fox_24nt_0049881_0000001 + 1

>supercont2.1-_candidate_235_start_1817642_stop_1817414_length_229nt_hairpin_4_213_210nt_mappedmax_1 map_smallRNA_1
CUCGGGUGCUCCCGUGUGCGAAUUACCUAUUUAGGCAGUGCAACACCAACACCAUUGAAAUCUAGAAUAUAAUGCAAAAAAGACUCAAGUCACAGACAGAAUCAUGAAUGACUAAGACUGCAAACGGCCAAAAAAUGACAGCUGAUAGGCGCUGGAGACUUGCUCCCACCAGGGCUUGAACCUGAGACCUUCGCAUUACCGGAUACUCGG
..((((((.(((.(((((((((.......((((((((((((...............................((((.....(((....))).((..((......))..))........))))..((((............))))....))))))....(..((((......))))..)..))))))...)))))).))).))))))))). (-47.80)
............................................................................................................................................................................................CTTCGCATTACCGGATACTCGG	fox_22nt_0058143_0000001 + 189

>supercont2.1-_candidate_239_start_1854737_stop_1854422_length_316nt_hairpin_146_200_55nt_mappedmax_1 map_smallRNA_1
GGAGGAGCGCAUCUCUGAGCACGACACGCAUGCCGACUUCAGCGUUGACUUUUCC
(((((((..((.(.(((((..((.((....)).))..))))).).)).))))))) (-13.10)
GGAGGAGCGCATCTCTGAGCA..................................	fox_21nt_0050025_0000001 + 1

>supercont2.1-_candidate_243_start_1877393_stop_1877186_length_208nt_hairpin_99_156_58nt_mappedmax_3 map_smallRNA_2
UUUUAAGGCUGCGUAGUGAAGCCACAGUGUUAUUUAUACGUCAUUCGACAGUUUGAAA
.....((((((((.(((((.......((((.....)))).))))))).)))))).... (-11.40)
TTTTAAGGCTGCGTAGTGAA......................................	fox_20nt_0057304_0000001 + 1
TTTTAAGGCTGCGTAGTGAAG.....................................	fox_21nt_0033896_0000002 + 1

>supercont2.1-_candidate_247_start_1903061_stop_1902785_length_277nt_hairpin_109_256_148nt_mappedmax_1 map_smallRNA_1
CAGAACUCCUACGAAGCGCUCGCCCGUCAACGAUCCACCUCGCAGAUGUCCAGGGACUCAGAGCACUCAGUAUCAACCAAGGCCAGCUUCACCUUUUCGCGAUCAUCGUCAACUUCUACUAGGGCGUCAUCAGCUUCAUAUGUCUCUG
((((((...((.(((((...(((((((..(((((.....((((.((.(((....))))).((((.((..((....))..))....)))).........))))..)))))..))........)))))......))))).)).)).)))) (-32.90)
CAGAACTCCTACGAAGCG..................................................................................................................................	fox_18nt_0048504_0000001 + 1

>supercont2.1-_candidate_284_start_2159330_stop_2159057_length_274nt_hairpin_33_173_141nt_mappedmax_34 map_smallRNA_34
GGCAUGCAUCUGAGCAGACGUCCUCCUGAUGCUGAAUAAUUUUCACCGGAAUCAAUCCUCAGCGAAGGCGCGGUGGCAGAGUGGUCUAAUGCGAUAGACUAGAAAUCUAUUCUCUUCGGAGGCGUCUGUUCGAAUCAGGCC
(((.((.((.((((((((((.(((((.((....(((((....((((((((.....)))...((....))..))))).....(((((((......)))))))......)))))...))))))))))))))))).)))).))) (-51.90)
................................................................................................................TCTTCGGAGGCGTCTGTTC..........	fox_19nt_0001726_0000032 + 113
................................................................................................................TCTTCGGAGGCGTCTGTT...........	fox_18nt_0054637_0000001 + 113
................................................................................................................TCTTCGGAGGCGTCTGTTCG.........	fox_20nt_0006676_0000008 + 113
................................................................................................................TCTTCGGAGGCGTCTGTTCGA........	fox_21nt_0027425_0000002 + 113
.................................................................................................................CTTCGGAGGCGTCTGTTC..........	fox_18nt_0000445_0000113 + 114
.................................................................................................................CTTCGGAGGCGTCTGTTCG.........	fox_19nt_0001195_0000048 + 114
.................................................................................................................CTTCGGAGGCGTCTGTTCGA........	fox_20nt_0008334_0000006 + 114
..................................................................................................................TTCGGAGGCGTCTGTTCG.........	fox_18nt_0002930_0000011 + 115
..................................................................................................................TTCGGAGGCGTCTGTTCGA........	fox_19nt_0018007_0000002 + 115
..................................................................................................................TTCGGAGGCGTCTGTTCGAA.......	fox_20nt_0102075_0000001 + 115
...................................................................................................................TCGGAGGCGTCTGTTCGA........	fox_18nt_0010924_0000002 + 116
...................................................................................................................TCGGAGGCGTCTGTTCGAAT......	fox_20nt_0013755_0000003 + 116
....................................................................................................................CGGAGGCGTCTGTTCGAA.......	fox_18nt_0007558_0000003 + 117
....................................................................................................................CGGAGGCGTCTGTTCGAAT......	fox_19nt_0046930_0000001 + 117
.....................................................................................................................GGAGGCGTCTGTTCGAATC.....	fox_19nt_0010974_0000003 + 118
.....................................................................................................................GGAGGCGTCTGTTCGAATCAG...	fox_21nt_0019091_0000003 + 118
.....................................................................................................................GGAGGCGTCTGTTCGAATCAGG..	fox_22nt_0088822_0000001 + 118
.....................................................................................................................GGAGGCGTCTGTTCGAATCAGGC.	fox_23nt_0001772_0000033 + 118
......................................................................................................................GAGGCGTCTGTTCGAATCA....	fox_19nt_0009170_0000004 + 119
......................................................................................................................GAGGCGTCTGTTCGAATC.....	fox_18nt_0038341_0000001 + 119
......................................................................................................................GAGGCGTCTGTTCGAATCAGG..	fox_21nt_0033740_0000002 + 119
......................................................................................................................GAGGCGTCTGTTCGAATCAGGC.	fox_22nt_0001203_0000060 + 119
......................................................................................................................GAGGCGTCTGTTCGAATCAGGCC	fox_23nt_0016418_0000002 + 119
.......................................................................................................................AGGCGTCTGTTCGAATCA....	fox_18nt_0010494_0000002 + 120
.......................................................................................................................AGGCGTCTGTTCGAATCAG...	fox_19nt_0019030_0000002 + 120
.......................................................................................................................AGGCGTCTGTTCGAATCAGG..	fox_20nt_0008518_0000006 + 120
.......................................................................................................................AGGCGTCTGTTCGAATCAGGC.	fox_21nt_0000621_0000137 + 120
.......................................................................................................................AGGCGTCTGTTCGAATCAGGCC	fox_22nt_0012563_0000004 + 120
........................................................................................................................GGCGTCTGTTCGAATCAGGC.	fox_20nt_0006480_0000008 + 121
.........................................................................................................................GCGTCTGTTCGAATCAGGC.	fox_19nt_0004437_0000010 + 122
.........................................................................................................................GCGTCTGTTCGAATCAGGCC	fox_20nt_0085688_0000001 + 122
..........................................................................................................................CGTCTGTTCGAATCAGGC.	fox_18nt_0002494_0000014 + 123
..........................................................................................................................CGTCTGTTCGAATCAGGCC	fox_19nt_0055074_0000001 + 123
...........................................................................................................................GTCTGTTCGAATCAGGCC	fox_18nt_0016369_0000001 + 124

>supercont2.1-_candidate_29_start_165219_stop_165017_length_203nt_hairpin_99_200_102nt_mappedmax_2 map_smallRNA_2
AGGCCCCUUGACCAGAAGCGUGAUAAAUCAAGGUUUUUCGGCCUUCGCUCAAAGGUCUCGAUCCUCCACUCUAAAUCGAGUGUCGCGUCUGGUCAUGCGCCU
((((.(..((((((((.(((......(((.((..((((.(((....))).))))..)).)))....(((((......))))).))).)))))))).).)))) (-36.70)
AGGCCCCTTGACCAGAAGC...................................................................................	fox_19nt_0054859_0000001 + 1
AGGCCCCTTGACCAGAAGCG..................................................................................	fox_20nt_0073397_0000001 + 1

>supercont2.1-_candidate_308_start_2386826_stop_2386625_length_202nt_hairpin_36_200_165nt_mappedmax_1 map_smallRNA_1
GCCAACACUUUCGCCGGCGACUGCAAGAACUGCGGCUGGGGUUACAACUGGGACUCCUCUUCCGGCGGUCUCAAGGGUCUCAACUUCAUCCCUACCCUCUGGAACGACCAGCCUCUCCACACCGACCGCUUUGCCGACAACUGUGCCCAGGCUCUGAGUGAUGGC
((((.(((((..(((((.....(((.......((((.(((((..(....)..)))))......(((((((...((((............)))).....((((.....))))............)))))))..)))).......))))).)))...))))).)))) (-55.04)
...................................................................................................................................................CAGGCTCTGAGTGATGGC	fox_18nt_0010242_0000002 + 148

>supercont2.1-_candidate_323_start_2508387_stop_2508169_length_219nt_hairpin_131_202_72nt_mappedmax_1 map_smallRNA_1
UCGAGGUUGAGUUCAAGGGCGAGACCAAGACCUUCACCCCCGAGGAGAUCUCCGCCAUGAUCCUCACCAAGA
....(((.(((.(((..((((.((....((.((((........)))).)))))))).)))..)))))).... (-18.80)
TCGAGGTTGAGTTCAAGGGC....................................................	fox_20nt_0100770_0000001 + 1

>supercont2.1-_candidate_330_start_2588658_stop_2588428_length_231nt_hairpin_64_129_66nt_mappedmax_1 map_smallRNA_1
AGACUGCUUCACUGAUACCAAUUUCCAUAGCUAAGUUACUGAAGAUGAUGGAGGAGAGGAGGAUGU
...((.((((.((..((.((.((((..((((...))))..)))).)).))..)).)))).)).... (-10.00)
................................................TGGAGGAGAGGAGGATGT	fox_18nt_0054055_0000001 + 49

>supercont2.1-_candidate_349_start_2793397_stop_2793133_length_265nt_hairpin_122_215_94nt_mappedmax_1 map_smallRNA_1
UGUUGUUGUGUUGUUGUUGAUAGUGAGAUAUAGAUGUAGCUGAGGUGGGCGAGACAGCUGGAUCGUUGUACUUGAAAGGAGGAUAGAAGCGAGG
..(((((.((((.((.((...((((.......(((.((((((............)))))).)))....))))...)).)).))))..))))).. (-20.80)
TGTTGTTGTGTTGTTGTTG...........................................................................	fox_19nt_0075115_0000001 + 1

>supercont2.1-_candidate_351_start_2793595_stop_2793364_length_232nt_hairpin_62_127_66nt_mappedmax_2 map_smallRNA_1
CCGUAGUGAACAGGUCCAAGCUUGAGGAUGCGGUAGCUGUUGUUGGAGCUGGAGCUGGAGCUGGAG
...((((...(((.((((.((((.((.(.((....))...).)).)))))))).)))..))))... (-22.80)
............................TGCGGTAGCTGTTGTTGGAGC.................	fox_21nt_0089545_0000001 + 29

>supercont2.1-_candidate_352_start_2793695_stop_2793455_length_241nt_hairpin_88_210_123nt_mappedmax_1 map_smallRNA_1
AUUCACAAAGGUUACCGUGACUUUAGUGAAGGAUAACAUCAUGAAAGUCGGUCUUGUGCUCAUCGGCAUGCUCGCCGUAGUGAACAGGUCCAAGCUUGAGGAUGCGGUAGCUGUUGUUGGAGC
.(((((((.(((((((((((((((.((((.(.....).)))).))))))((.(((((..((((((((......))))..))))))))).))............))))))))).))).)))).. (-42.30)
......................................................................................................TGCGGTAGCTGTTGTTGGAGC	fox_21nt_0089545_0000001 + 103

>supercont2.1-_candidate_377_start_3025382_stop_3025157_length_226nt_hairpin_95_166_72nt_mappedmax_3 map_smallRNA_3
GAGCUCGAGGCUGAGUACUAAGCGGUUACGGAUGCGAUUACUGGAAUACCGACUUGUACCCAGUUUUAGCCU
..(((.(((((((.((((.(((((((..(((.........)))....)))).))))))).)))))))))).. (-23.30)
GAGCTCGAGGCTGAGTACTAAGCGGT..............................................	fox_26nt_0030439_0000001 + 1
.AGCTCGAGGCTGAGTACTAAGCGGT..............................................	fox_25nt_0046235_0000001 + 2
......GAGGCTGAGTACTAAGCGGT..............................................	fox_20nt_0034500_0000001 + 7

>supercont2.1-_candidate_390_start_3095495_stop_3095269_length_227nt_hairpin_0_226_227nt_mappedmax_6 map_smallRNA_3
CUUCGGUAUUUUGCAUCCGUGUGACGCAGUAAAUUAAUUGAUACUGAUUUGCCUCUUGCUUCUUUCGAUAUUUUAUUCGAAGCGUCUUUGCUUCGCAUUGCAGUUGAACUCAAUUCUUUCAUCGUUUAACAGUGGCCCCUAGCUAGGCGCAUCGCAUCGCCGUGGCUAAGUGCCGAAUUUACAUCUACAUCAAGUGCAUUUAUCGAGCACUGCAGCAACAACAUCCG
.((((((((((.((...((.((((.((.((((((((........))))))))...........(((((........)))))((((((..(((..(..(..(.(((((((..............))))))).)..)..)..))).))))))...)).))))))..)).))))))))))...............(((((.........)))))................ (-57.24)
..................................................................................................................TCTTTCATCGTTTAACAGTGG............................................................................................	fox_21nt_0012365_0000004 + 115
....................................................................................................................TTTCATCGTTTAACAGTGGC...........................................................................................	fox_20nt_0095846_0000001 + 117
.........................................................................................................................................................GCATCGCCGTGGCTAAGTGC......................................................	fox_20nt_0040781_0000001 + 154

>supercont2.1-_candidate_392_start_3143293_stop_3143079_length_215nt_hairpin_105_173_69nt_mappedmax_1 map_smallRNA_1
UGCAGCAAGCUUCUGAAGAUGAGACCACGGAUUCCUCAACGGCUGUCAAUUCCGAGGAAGCUUCCAUCA
....(.((((((((...((...(((..((..........))...)))...))...)))))))).).... (-15.20)
TGCAGCAAGCTTCTGAAG...................................................	fox_18nt_0042879_0000001 + 1

>supercont2.1-_candidate_396_start_3163013_stop_3162790_length_224nt_hairpin_62_145_84nt_mappedmax_1 map_smallRNA_1
CUUGGUUAUUGACCCCUUGUGCGUCUGUAGGCCGUGGAAAGUACUCUGAAGUCUUUGAAGGCAUCAAUGUCGUCAACUACCAGA
.(((((..(((((..(((((((.((...((((..((((......))))..))))..))..))).))).)..)))))..))))). (-23.30)
..................................................................ATGTCGTCAACTACCAGA	fox_18nt_0018064_0000001 + 67

>supercont2.1-_candidate_397_start_3164321_stop_3163992_length_330nt_hairpin_100_251_152nt_mappedmax_2 map_smallRNA_2
GUUAUGAUGAAAACCCUUGUAUCGUCAUCCUUAGUCGGAUCGGGGCUGGGGGUGGACGAAGUAUUGGCUUCGGCUGAUAUUGACACCUCUGCAGCCCUGAAAUGUCGAGCAAUUAAUCUUCUCUCUGAGAAAUGAGGCUUUUUAUUCGUAUU
..(((((((((((.((((...(((.(((((......)).(((((((((((((((.....(((((..((....))..)))))..))))))..))))))))).))).)))..........(((((...)))))..)))).)))))).))))).. (-54.70)
GTTATGATGAAAACCCTT......................................................................................................................................	fox_18nt_0014382_0000002 + 1
GTTATGATGAAAACCCTTG.....................................................................................................................................	fox_19nt_0083075_0000001 + 1

>supercont2.1-_candidate_399_start_3170309_stop_3170079_length_231nt_hairpin_42_116_75nt_mappedmax_2 map_smallRNA_2
CCGAACUGGCAAGGCUGUUAAGAAGUUCUCUAAGUUUUAAGUUGGGACUUUCUUCUGGCAUUUUUUUCGGCGUGA
(((((........(((...((((((.((((.............)))).))))))..)))......)))))..... (-14.16)
.......................................................TGGCATTTTTTTCGGCGTGA	fox_20nt_0044859_0000001 + 56
.........................................................GCATTTTTTTCGGCGTGA	fox_18nt_0021898_0000001 + 58

>supercont2.1-_candidate_408_start_3192538_stop_3192330_length_209nt_hairpin_91_161_71nt_mappedmax_4 map_smallRNA_4
CGAGAUUACGGACUCUGAGGUAAUGCAUGAGCUGGGGCGCGUCAUAUAAUUUAUCGGAGUCCUUGGGUUUG
..(((((..(((((((((...(((..((((((......)).))))...)))..)))))))))...))))). (-21.60)
CGAGATTACGGACTCTGA.....................................................	fox_18nt_0050828_0000001 + 1
CGAGATTACGGACTCTGAGGTAAT...............................................	fox_24nt_0024660_0000001 + 1
.....TTACGGACTCTGAGGTAATGCAT...........................................	fox_23nt_0057523_0000001 + 6
........CGGACTCTGAGGTAATGCAT...........................................	fox_20nt_0060885_0000001 + 9

>supercont2.1-_candidate_424_start_3418104_stop_3417888_length_217nt_hairpin_5_117_113nt_mappedmax_2 map_smallRNA_2
UAUCAACUCGAUAUGAGAAAAUAUGAGUCAAUCAGGAACUUGCCUUACCUAACUAACACUAUGAAUUUAGGCCCUCAUCGCCAAUAACCUCCAUGAACUCAUUCGAGAUGGCA
..(((.(((((.(((((......((((.(((........))).))))......................(((.......)))...............)))))))))).))).. (-19.50)
..............................................................................................GAACTCATTCGAGATGGC.	fox_18nt_0008746_0000003 + 95
..............................................................................................GAACTCATTCGAGATGGCA	fox_19nt_0061149_0000001 + 95

>supercont2.1-_candidate_425_start_3419675_stop_3419456_length_220nt_hairpin_94_158_65nt_mappedmax_4 map_smallRNA_4
GUUGAUGAACGCAUCAAGCAGGAACUCCGACACAUUGGAUUUCUUCCUCUUGAUGGAUUCGAAGC
.....((((..(((((((.(((((.(((((....)))))....))))))))))))..)))).... (-20.00)
.....TGAACGCATCAAGCAGGA..........................................	fox_18nt_0013755_0000002 + 6
.....TGAACGCATCAAGCAGGAA.........................................	fox_19nt_0018241_0000002 + 6
.....TGAACGCATCAAGCAGGAAC........................................	fox_20nt_0009376_0000005 + 6
.............................................CCTCTTGATGGATTCGAAGC	fox_20nt_0078951_0000001 + 46

>supercont2.1-_candidate_432_start_3532786_stop_3532566_length_221nt_hairpin_98_154_57nt_mappedmax_2 map_smallRNA_2
GCAGAAUACUGACACUCCUGCAGCGAUCAAAUAUCUUGAAGGAGGUCCAGAUUAUGC
(((.(((.(((((.(((((.(((.(((.....)))))).))))))).)))))).))) (-16.60)
GCAGAATACTGACACTCCTGCAG..................................	fox_23nt_0048642_0000001 + 1
.CAGAATACTGACACTCCTGCAG..................................	fox_22nt_0009745_0000005 + 2

>supercont2.1-_candidate_440_start_3580242_stop_3580026_length_217nt_hairpin_19_121_103nt_mappedmax_1 map_smallRNA_1
UCCUUUUCACCUCUCGUCGACACAACCUCUCAAGAUCACCCAAAACCACCUUCUUCAAACCAGCCAAAAUGGAGAACGACCGCGGCGAGAUUGUGGACCUGUA
.....(((((.((((((((.(......((....)).............(.(((((((............))))))).)...)))))))))..)))))...... (-20.10)
....................................................................................GCGAGATTGTGGACCTGTA	fox_19nt_0032668_0000001 + 85

>supercont2.1-_candidate_448_start_3728555_stop_3728339_length_217nt_hairpin_45_125_81nt_mappedmax_1 map_smallRNA_1
UCCAUCCUCGACCUUCGCAGCCGCCCCCUCCUCCGGCUGGAGCUAAUGAAGCGAUUGAGAACCAGAGGGCUGAGAAGAGGA
(((.((((((.(((((.((((((..........))))))..(((.....)))............))))).))))..))))) (-24.70)
...............................................................AGAGGGCTGAGAAGAGGA	fox_18nt_0013470_0000002 + 64

>supercont2.1-_candidate_463_start_3988436_stop_3988205_length_232nt_hairpin_146_219_74nt_mappedmax_1 map_smallRNA_1
UACAUGACAUUGAUAGGGGCGCUUGCUCUUCUUGAUGACCAGCUGUCAUCACAUUGUGCGCUUGAAUGCAUGGG
..((((.((((..((((.((((.((.......(((((((.....)))))))))..)))).)))))))))))).. (-22.21)
....................................................ATTGTGCGCTTGAATGCATGGG	fox_22nt_0063746_0000001 + 53

>supercont2.1-_candidate_473_start_4004397_stop_4003991_length_407nt_hairpin_13_364_352nt_mappedmax_2 map_smallRNA_3
UUGCGGGCGUUGGAGUUGGAGUUCAAGGCGUUCGGCGUAUUUGCAUUUCCUCUCGUCCUGUACUUGGUUUCCUCUGGGGGCUGGUCUGUGGUGAUGACAACUGUUUCACACACCAAAGUUGGCGAUUCACUUCACUUGCUCGGUAUGCCCUUCGGGGAAACUGACUUGUGUUGCGAACAUGUACCUCACUCAAGAACAGAGAUCUGAGCAGACCUCGAGGUUUUUCCUUUUCAUUUUUCAUUCAUGUAUUCUUCGCAAGUGCCUAGAGUAGCCGCAGUGACGAUAAUUUCCCUUUGCGUGAAGUUGUUCUCUUCCUUUGCGAACCCUCUCAUGGAGGUGUUUGCUGGGAAUA
...((.(((..((....((((..(((((((.....))).))))...))))..(((((((((....((((..(((((((.((..(.((.(((((.(((........)))..))))).)))..))....(((..(((..(.(((((...(((....)))..))))))..))).((((((...((((.......(((((..((((...(((.(((((....))))))))..)))).))))).......))))..)))))).)))))))))).)))))))).))))).......))..))).))...........(((((..((((((((((.....)))).)))))).))))).. (-107.44)
.....................................TATTTGCATTTCCTCTCGTCCTGTAC.................................................................................................................................................................................................................................................................................................	fox_26nt_0025386_0000001 + 38
......................................................................................................................................................................................................................................................TATTCTTCGCAAGTGCCT........................................................................................	fox_18nt_0015124_0000002 + 247
............................................................................................................................................................................................................................................................................................................................................GGAGGTGTTTGCTGGGAATA	fox_20nt_0070981_0000001 + 333

>supercont2.1-_candidate_55_start_477732_stop_477504_length_229nt_hairpin_21_166_146nt_mappedmax_2 map_smallRNA_2
GACACUUGUUCUCUACUGACAUUUUCCUGAUGUUGAACUGUUGCAUUUCCCAGCGCUUGUGUUCCGUCUUUCCGUUCGCGAACUAUCUGCUAUGGGUUUUCCGAAGUUUGCAUAUGUUAACGUUAAUGUCGGGUGGAACAAGCGUC
(((.((((((((...(((((((.....(((((((((.....((((...((((..((..((((((((..........)).)))).))..))..))))............))))....))))))))))))))))..)))))))).))) (-43.96)
.ACACTTGTTCTCTACTGACA.............................................................................................................................	fox_20nt_0089599_0000001 + 2
..............................................................................................................................TGTCGGGTGGAACAAGCGTC	fox_20nt_0070781_0000001 + 127

>supercont2.1-_candidate_6_start_76456_stop_76234_length_223nt_hairpin_126_195_70nt_mappedmax_4 map_smallRNA_4
AUGAGUAAGGACCUAAGAACGUUUCGACUGCCGAUCUACUCGCUUGUCUUGUUCUCAGCGUCCUUUUCUA
..(((.((((((((.((((((....(((...(((.....)))...))).)))))).)).))))))))).. (-21.00)
ATGAGTAAGGACCTAAGAAC..................................................	fox_20nt_0058745_0000001 + 1
.TGAGTAAGGACCTAAGAAC..................................................	fox_19nt_0063195_0000001 + 2
..GAGTAAGGACCTAAGAAC..................................................	fox_18nt_0039456_0000001 + 3
...................................................TTCTCAGCGTCCTTTTCTA	fox_19nt_0041602_0000001 + 52

>supercont2.1-_candidate_80_start_604193_stop_603896_length_298nt_hairpin_17_223_207nt_mappedmax_1 map_smallRNA_2
GUCGAGUAAGCUCGUUACUGUGUUUUGACUGAUGGUCGAUGUACAGUAUGAGUUUGGCGGCUGCUUGGGUUCCUCUUUGCUACUUGCAAGCGGCUUUUGAUGAAAUUUGGAGUUGGGUUUUGGACUGCACUGGCCUGCAAUGAAAAUGUUGGUCAAGCAUUUUGUGUUUUGUCUACCAGGAUAGCAUGGAACGAAGUGUUUGGCAAA
((((..(((((((((.((((((..(((((.....)))))..))))))))))))))).)))).((((.(.((((....(((((((((....((((((..(((...)))..)))))).....(((((.(((((((((.(((.(....)))).)))))........))))...))))).)))).))))).))))).)))).......... (-64.40)
.......................................TGTACAGTATGAGTTTGGCGGC..................................................................................................................................................	fox_22nt_0082407_0000001 + 40
....................................................................................................................................................TTGGTCAAGCATTTTGTG.........................................	fox_18nt_0050446_0000001 + 149

>supercont2.1-_candidate_86_start_605042_stop_604779_length_264nt_hairpin_24_248_225nt_mappedmax_2 map_smallRNA_2
AGCUGGCUUCCGAUUUCCUCGACCGACAGGCCCCUGUCUUCCGUGACGACACCUGCGUCUUCGUCUCUCAGUCUGGUGAGACUGCCGACUCCCUCAUGGCUCUCCGCUACUGCUUGGAGCGUGGUGCCCUGACUGUCGGUAUUGUUAACGUUGUCGGCUCCUCCAUCUCUCUCCUUACCCACUGUGGUGUCCACAUCAACGCCGGUCCCGAGAUCGGUGUCGCCU
.((.(((..((((((((...(((((((((....)))))....(((..((((((.(((....)))....((((..((((((..(((((((....(((.(((.(..((((.((....))))))..).))).)))..)))))))..((..((...))..))...............)))))).)))).))))))))).........))))..)))))))).))))).. (-78.80)
AGCTGGCTTCCGATTTCCT..............................................................................................................................................................................................................	fox_19nt_0038082_0000001 + 1
..CTGGCTTCCGATTTCCTCGAC..........................................................................................................................................................................................................	fox_21nt_0056133_0000001 + 3

>supercont2.10+_candidate_101_start_1022142_stop_1022369_length_228nt_hairpin_5_124_120nt_mappedmax_1 map_smallRNA_1
GCUGGCCACGAACACCAGUUGCCGACGAUUAUCAUGCACAGGAGAUCAGCAGUCCCAUGUCAUUGGCGUCAGGUGACGAUCCUGCGUUCCUUAAGCGGCAACUACGGAAUUCGGAGCAGC
((((.(..((((..((((((((((....(((....((.(((((..(((.(.(.((((......))).).).).)))...))))).))....))).))))))))..))..))))..))))) (-42.10)
...............................................................................................CGGCAACTACGGAATTCGGAGCAGC	fox_25nt_0049527_0000001 + 96

>supercont2.10+_candidate_102_start_1023857_stop_1024081_length_225nt_hairpin_31_120_90nt_mappedmax_1 map_smallRNA_1
UACAGUUUGUCAUUGAGAACAGUAACACGAUCUUCGAGGAUGCUUAGGGAGCUCGAGAUCUCUAUACGGAAAGGGCUUAUGAAGACUGUA
((((((((.((((.(((..(.(((....(((((.((((..(.(....).).)))))))))....))).....)..))))))))))))))) (-23.20)
.....................................................................AAAGGGCTTATGAAGACTGTA	fox_21nt_0100786_0000001 + 70

>supercont2.10+_candidate_103_start_1075291_stop_1075515_length_225nt_hairpin_3_122_120nt_mappedmax_1 map_smallRNA_1
UCCCCAGCAGGGUCGCGCCCAGCCUAUUACGCCGGGGCCCCCCAACCCCAAGGCUAUUGCUCUUGCCUCGUUCCUCCGAGGCCAGGAUCUCAAGCCCAGAACUGUGAUUCUGAACGGCGA
..(((....)))...(((((((...(((((...((((........))))..((((...(.((((((((((......))))).))))).)...)))).......))))).)))...)))). (-41.50)
......................................................................................................TGTGATTCTGAACGGCGA	fox_18nt_0025118_0000001 + 103

>supercont2.10+_candidate_130_start_1303395_stop_1303596_length_202nt_hairpin_31_103_73nt_mappedmax_1 map_smallRNA_1
CGUCAACAUGUUUGAAGAAUCUGAACUCGAGAGCUAUCAGCCCUGCAUUCCGCAGAUUCUCGAACUGUUCAAC
....((((.((((((.(((((((.....(((.((..........)).)))..))))))))))))))))).... (-19.10)
.......................................................ATTCTCGAACTGTTCAAC	fox_18nt_0047783_0000001 + 56

>supercont2.10+_candidate_138_start_1334576_stop_1334785_length_210nt_hairpin_0_209_210nt_mappedmax_4 map_smallRNA_4
CAGGACUUGGUAUGACGGUUUCUUGUGGAGUGAUCAUGAGCUACCUUAUGGGUAUUCGUUACUUGGCCAACGGUUAUAUUUCUUUGGCUGAACGCUUGCGAUGGAACUGGCUACGUGCUAAUGACGGAGAGGAGGAUACCCUGCUGGCUGCUCGAUUGAACCAAGACAUCAUCGGAACCCUCGUUCUACGCCUUGAGCCCAACCCGACUU
((((.(.(((.((((.((((((...(((..(((((..((((..((....((((((((.....(..(((((.((.......)).)))))..)...(((....((..(.((((.....)))).)..))..)))..))))))))....))..)))))))))..))).(....)...)))))).)))).))).).))))............... (-58.20)
CAGGACTTGGTATGACGG................................................................................................................................................................................................	fox_18nt_0037116_0000001 + 1
CAGGACTTGGTATGACGGTT..............................................................................................................................................................................................	fox_20nt_0093955_0000001 + 1
.AGGACTTGGTATGACGGT...............................................................................................................................................................................................	fox_18nt_0027112_0000001 + 2
.AGGACTTGGTATGACGGTTTCT...........................................................................................................................................................................................	fox_22nt_0023686_0000002 + 2

>supercont2.10+_candidate_139_start_1334653_stop_1334891_length_239nt_hairpin_4_234_231nt_mappedmax_1 map_smallRNA_2
CUUUGGCUGAACGCUUGCGAUGGAACUGGCUACGUGCUAAUGACGGAGAGGAGGAUACCCUGCUGGCUGCUCGAUUGAACCAAGACAUCAUCGGAACCCUCGUUCUACGCCUUGAGCCCAACCCGACUUCUAGCCACAGACGCAGACGAUCGCUUUCUCUACGAGGAGGCAAGGGUGUCAUUCGCGCGUGGACCACCAACCUCAACUACCGUGGAAAGGGCGUUGGAAAGG
((((..((.(((((((.(.((((...(((((((((((.((((((.(..((.(((....))).))..).((((((.(((.........)))..(((((....))))).....))))))...((((..(.(((.((.......))))).)...((((((((...))))))))..)))))))))).)))))))).))).............)))).)...))))))))).)))) (-68.39)
......................................................................................................................................................................................................ACCTCAACTACCGTGGAAAGGGCG.........	fox_24nt_0042256_0000001 + 199
.................................................................................................................................................................................................................CGTGGAAAGGGCGTTGGAAAGG	fox_22nt_0023748_0000002 + 210

>supercont2.10+_candidate_140_start_1334841_stop_1335047_length_207nt_hairpin_14_182_169nt_mappedmax_1 map_smallRNA_2
ACCUCAACUACCGUGGAAAGGGCGUUGGAAAGGAUCUCCUCCAGGAGGCUGUCCGUGUUACCAAGGAACGUUGUGGAAAGGAUGCUGAAGUUGGGUUCGCUCAAGAGCACGCCAACAGCGCCAUGUUACUGCCCGGCAUCUUCAACGCCCCCUUCCGACGUGACGAGGU
(((((..(...(((((((.((((((((((.((.((((..((((.((.(...(((.((....)).))).).)).))))..)))).))...(((((((..(((....))).(((.....)))..........)))))))...))))))))))..)))).))).)..))))) (-62.40)
ACCTCAACTACCGTGGAAAGGGCG.................................................................................................................................................	fox_24nt_0042256_0000001 + 1
...........CGTGGAAAGGGCGTTGGAAAGG........................................................................................................................................	fox_22nt_0023748_0000002 + 12

>supercont2.10+_candidate_152_start_1464776_stop_1464979_length_204nt_hairpin_86_188_103nt_mappedmax_1 map_smallRNA_1
CUGGACGGCGAUCAAGACUGGAUUCGUUGGCGUAAAGGCAGCACUGGGACACUUUUCCGGGUACGGAGGCGAACCUAGACGACCUUGCGUGGCGCCAUCUCAG
(((((.((((.(((.(...((....((((.(.....).)))).(((((...(.((((((....)))))).)..)))))....))...).))))))).)).))) (-33.50)
CTGGACGGCGATCAAGACT....................................................................................	fox_19nt_0021653_0000002 + 1

>supercont2.10+_candidate_160_start_1561757_stop_1562016_length_260nt_hairpin_55_119_65nt_mappedmax_1 map_smallRNA_1
GUUGUUGAAUGAGGUUAUGUGCUAUCCGUUGUUUGAUGGAGGAAAUAUUGGUCUGAGACGACGAC
(((((((..(.((..(((((....((((((....))))))....))).))..)).)..))))))) (-17.60)
...............................................TTGGTCTGAGACGACGAC	fox_18nt_0009252_0000002 + 48

>supercont2.10+_candidate_163_start_1589046_stop_1589262_length_217nt_hairpin_97_161_65nt_mappedmax_2 map_smallRNA_2
AUAUGACUGAGUUGUCGGGGCGGUGGAUGUCAAUAGUUCCUUAGCUCUACGACAACCUUUCAUCA
..((((..(.(((((((((((...(((..........)))...))))..))))))))..)))).. (-20.50)
...TGACTGAGTTGTCGGGGC............................................	fox_18nt_0010784_0000002 + 4
...........................................GCTCTACGACAACCTTTCATCA	fox_22nt_0025690_0000002 + 44

>supercont2.10+_candidate_167_start_1738168_stop_1738385_length_218nt_hairpin_100_190_91nt_mappedmax_1 map_smallRNA_1
UGUUUGAGAACUUCCAAGGAUCUCGUAUAGCUGCUUUCCCAAUUGCCCUGAGAUAUUGCAAGCACAUAAUGUUCCUCAAAGCUCUCGAAGA
..(((((((.(((...((((.(...(((.(((((..((.((.......)).))....)).)))..)))..).))))..))).))))))).. (-17.90)
TGTTTGAGAACTTCCAAGG........................................................................	fox_19nt_0017780_0000002 + 1

>supercont2.10+_candidate_168_start_1747074_stop_1747415_length_342nt_hairpin_181_238_58nt_mappedmax_1 map_smallRNA_1
UUUCGGAGUCCAAUUCUCGGUUAUCAGAUUCAUAUUCUUUAAGGAUUAGACUCGGCGU
...(.(((((.((((((..(.....(((.......))))..)))))).))))).)... (-12.00)
........................................AAGGATTAGACTCGGCGT	fox_18nt_0006831_0000004 + 41

>supercont2.10+_candidate_180_start_1987416_stop_1987635_length_220nt_hairpin_1_219_219nt_mappedmax_1 map_smallRNA_1
AUGUUUGGCAGUGCUGAAUUUAUAUAGAAGUUGACCCGCUGCGCUGGCAAACAUUUGACACUCGCCCAGCCGCUGCAACAACUCAGCCUUAGGAUAAUUUUAGGAUGGAUUUUAGGGCAAGAAAUUCGGUUCAUUUCUCUUUUUGCUUAACCUGGCCACGUAGAGGCUCGGUUUACGUUUAUAAAGAAGCAUUUGUCUGUAAAGUAUUGCCUGCAGCAU
.(((..(((((((((..((..(((.((((((.((((.((.((((((((...............).)))).))).)).........((((((((((.(((....)))..)))))))))).........)))).)))))).....(((((((((.((((.......)))).)))).............)))))..)))..))..))))))))).))).... (-60.07)
.......................................................................................................................................................................................................TAAAGTATTGCCTGCAGCAT	fox_20nt_0048759_0000001 + 200

>supercont2.10+_candidate_187_start_2065542_stop_2065758_length_217nt_hairpin_25_118_94nt_mappedmax_1 map_smallRNA_1
AGUGUUCUCGCACGACUCAAAAAAGGUGGCAUCGGGCUCUUCUGACAAUACGAUACGGAUCUGGGAUGCCGAAAUAGGUCGCUGUGAAGACGUC
...((..((((((((((.........(((((((.......((((...........)))).....))))))).....))))).)))))..))... (-25.24)
...........................................................................AGGTCGCTGTGAAGACGTC	fox_19nt_0020716_0000002 + 76

>supercont2.10+_candidate_38_start_383223_stop_383469_length_247nt_hairpin_45_242_198nt_mappedmax_2 map_smallRNA_2
AAUGGGGUAGAAUCUGGAGGAUGGAAAGAAGUUGACAGAGAUGGAAUGAUGGUCAUGGUAAACGAACGGCUAUGAGCUCACGAUUGGUAUGGAUUGGAAGAGAUAUGUAACAUUGCUUUGUUGGUGAAAGGAGUGCUUUGGUUUUCAAUUGAAAGUCUUUCUCGACUGCAUCAUCUUAUCCUUUCCUUCUGCCCCAGU
..((((((((((...((((((((((....((((((.((((((....(((.(.(((((((.........))))))).)))).........(.(((((((((...((.....((((.((((.......)))).))))...)).))))))))).)..)))))).))))))......)).))))))))..)))))))))).. (-57.60)
AATGGGGTAGAATCTGGAGGATGG..............................................................................................................................................................................	fox_24nt_0048805_0000001 + 1
..TGGGGTAGAATCTGGAGGATGG..............................................................................................................................................................................	fox_22nt_0060848_0000001 + 3

>supercont2.10+_candidate_41_start_402307_stop_402522_length_216nt_hairpin_8_71_64nt_mappedmax_1 map_smallRNA_1
AGACCUCGAGCGCUGGCAAUUUCCUCAGAGAAAACGCAGCAACGCAGAGCACAGCGAUGAUUCU
(((..(((..(((((((..((((......))))..((......))...)).))))).))).))) (-13.80)
AGACCTCGAGCGCTGGCA..............................................	fox_18nt_0049194_0000001 + 1

>supercont2.10+_candidate_6_start_117396_stop_117624_length_229nt_hairpin_34_125_92nt_mappedmax_2 map_smallRNA_2
CUCAUGAUCACGAUUAAGCCGGAGCGUCAAUUGCCAUCCCUUGGCCGAAAGGCUAAGGGUGCAUAGUUGGGGCUUGACUUUGUUGGUCGGAC
.((.((((((((((((((((..(((......(((...(((((((((....))))))))).)))..)))..)))))))..))).)))))))). (-40.20)
CTCATGATCACGATTAAGCC........................................................................	fox_20nt_0097931_0000001 + 1
..CATGATCACGATTAAGCCGG......................................................................	fox_20nt_0051122_0000001 + 3

>supercont2.10+_candidate_72_start_632161_stop_632373_length_213nt_hairpin_18_118_101nt_mappedmax_1 map_smallRNA_1
GGUAAGUAUUUUCACAUCUUAUUCAAAAACCAGUACUAAUUCAUGAUUAGGAGCCCGAGUCAAGCAAUUUCGAUGACAAUGACGAGAUUGAGAAGCUGACC
(((.(((.((((((.(((((..(((..........((((((...))))))........((((...........))))..))).)))))))))))))).))) (-17.90)
..................................................................................CGAGATTGAGAAGCTGACC	fox_19nt_0014145_0000002 + 83

>supercont2.10+_candidate_87_start_793035_stop_793364_length_330nt_hairpin_147_221_75nt_mappedmax_5 map_smallRNA_5
UUAUGGUUGUUUGGGUACGGUGUACGUUUAUAAGUCAUGCAGACAUGAGCUGUCCAUCGAGCCGGACAGCCGAAU
...(((((((((((.(.(((((.((((((((..(((.....))))))))).)).)))))).)))))))))))... (-29.60)
TTATGGTTGTTTGGGTACGGTGTACGTT...............................................	fox_28nt_0024976_0000001 + 1
.TATGGTTGTTTGGGTACGGTG.....................................................	fox_21nt_0107699_0000001 + 2
...TGGTTGTTTGGGTACGGTGTACGTT...............................................	fox_25nt_0005125_0000005 + 4
.....................................................CCATCGAGCCGGACAGCCG...	fox_19nt_0078482_0000001 + 54
......................................................CATCGAGCCGGACAGCCG...	fox_18nt_0008467_0000003 + 55

>supercont2.10-_candidate_113_start_1110325_stop_1110105_length_221nt_hairpin_98_153_56nt_mappedmax_1 map_smallRNA_1
UGCGGAGCUCUACAAGGCAUUGCAUUUGAUAUUGCUUUGCUUUCUCAAGUUUUGCA
.((((((((..(.((((((..(((........)))..)))))).)..)))))))). (-19.80)
TGCGGAGCTCTACAAGGCAT....................................	fox_20nt_0062051_0000001 + 1

>supercont2.10-_candidate_114_start_1149049_stop_1148824_length_226nt_hairpin_68_123_56nt_mappedmax_1 map_smallRNA_1
CUUGCUUGUCUGCCCUCUCAGUACGGUAACAAACUGGGAGGAACAGAUCAAGCAAC
.(((((((((((.(((((((((..(....)..)))))))))..)))).))))))). (-26.50)
...............................AACTGGGAGGAACAGATCAAGCAAC	fox_25nt_0020121_0000001 + 32

>supercont2.10-_candidate_115_start_1156351_stop_1156127_length_225nt_hairpin_109_187_79nt_mappedmax_1 map_smallRNA_1
AGGACUCCGAGAAGUACGCUGAGGCCGACAAAGAGCGCAAGGGUGCUAUCGAGGCUGCCAACCGUGCUGACAGCGUCCU
(((((.(.(...((((((.((.((((.......(((((....))))).....))))..))..))))))..).).))))) (-26.90)
AGGACTCCGAGAAGTACGC............................................................	fox_19nt_0059665_0000001 + 1

>supercont2.10-_candidate_120_start_1218993_stop_1218768_length_226nt_hairpin_100_218_119nt_mappedmax_1 map_smallRNA_1
AAGAACUUGAUGAAGGCGAACUCAGAAGAAUCCAAUGUGCAUUGCCAGAGCAAGUCAACCAGUCCGACAUGGCUCUGGCUCGAGCAGAGCCCGACUCAAACCGCAUUCAUCCAAGUCAA
..((.(((((((((.(((...................(((...((((((((..(((.........)))...))))))))....)))(((.....)))....))).))))).)))))).. (-36.60)
AAGAACTTGATGAAGGCG.....................................................................................................	fox_18nt_0054793_0000001 + 1

>supercont2.10-_candidate_125_start_1395649_stop_1395280_length_370nt_hairpin_61_208_148nt_mappedmax_1 map_smallRNA_1
CUUUCUCUCUUCUCUCCAAUUCAAAUAUUGAACAACGCAAAAAACCACGUUCAUGUUUCUCUACAUAUAAUUGAUGCGAGGUGCGUCGAAAGACCUGCGCCCAAGACCACCGAUUCAGAGGAACACAGAAUGGAGAGAAAAGCGAACA
..(((.((.(((((((((.(((......(((((...............))))).((((((((.((......))....(.((((((((....)))..))))))..............))))))))...)))))))))))).)).))).. (-44.46)
................................................................................................................................AATGGAGAGAAAAGCGAACA	fox_20nt_0057626_0000001 + 129

>supercont2.10-_candidate_129_start_1453954_stop_1453697_length_258nt_hairpin_88_154_67nt_mappedmax_1 map_smallRNA_1
AGUUGGAAUCACAUGGAAUUUGAGACUCGAUCUCGAUUCUCAACUGAUGAUUCAGUGACGUCAGACU
..((((..((((...((((((((((.(((....))).)))))......))))).))))..))))... (-17.40)
.................................................ATTCAGTGACGTCAGACT	fox_18nt_0022777_0000001 + 50

>supercont2.10-_candidate_130_start_1454165_stop_1453838_length_328nt_hairpin_138_227_90nt_mappedmax_1 map_smallRNA_1
GCGAUGGGUUUCCUUUUUACAAUCAUACACAGAUAAACAGAACUAUAGAUACGGGACGGUAAUGACCGGGAUGAACAGGAUAUACAGCGC
(((.((..(.((((.((((..(((.......)))......................((((....))))...)))).)))).)..)).))) (-15.10)
.......................................................................TGAACAGGATATACAGCGC	fox_19nt_0011248_0000003 + 72

>supercont2.10-_candidate_131_start_1454332_stop_1454045_length_288nt_hairpin_0_287_288nt_mappedmax_2 map_smallRNA_2
UGAAGGAACUGCGUUCAAUGUGUUGUUCAAGGUUAUCCAAGUUGCCAUUGGUAUCAGUGUCGGUUUGUUCAUGAGUGCACUAAUCGUCUACCCAUUGGGUAAGAGACGAAGUGGACUGUUCAGUUUCUAAGCUGAACGCACAUUCAUUUUUAUACUGCAUUUCAUUAUGGUCAUAAUAUUAGAGCGUCAGUUGUUUCAGGAUGGCUUAUCACAGCGAAUAUACAAAAGCAACAAGGGAAAUUGCUUGGAGUUAUUGUUUUCUUUGUCAUAUUGGAAUUGGGAUUGAAG
(((((.((((((((((...(((((((....((....)).....((((((((.((((((((..(..((...(((.((.((((..((((((((((...))))...)))))))))).)).((((((((....))))))))...))).))..)..)))))).)).)))..))))).)))))))..))))).))))).)))))........(((.((((.(((...((((.(((..((((........))))..))).)))).))).)))).))).................. (-76.10)
...........................................................................................................................................................................CATAATATTAGAGCGTCAGT.................................................................................................	fox_20nt_0103540_0000001 + 172
...................................................................................................................................................................................TAGAGCGTCAGTTGTTTCAGG........................................................................................	fox_21nt_0105418_0000001 + 180

>supercont2.10-_candidate_133_start_1454595_stop_1454332_length_264nt_hairpin_1_55_55nt_mappedmax_1 map_smallRNA_1
UCGACUCGGACUCCUGGUCCCUCCCAACACUCAACGACCCCGAGUCUCGACCCGG
.((..((((((((..((((................))))..))))).)))..)). (-15.99)
.....................................CCCCGAGTCTCGACCCGG	fox_18nt_0044733_0000001 + 38

>supercont2.10-_candidate_134_start_1454859_stop_1454525_length_335nt_hairpin_265_319_55nt_mappedmax_1 map_smallRNA_1
UCGACUCGGACUCCUGGUCCCUCCCAACACUCAACGACCCCGAGUCUCGACCCGG
.((..((((((((..((((................))))..))))).)))..)). (-15.99)
.....................................CCCCGAGTCTCGACCCGG	fox_18nt_0044733_0000001 + 38

>supercont2.10-_candidate_141_start_1456450_stop_1456159_length_292nt_hairpin_99_187_89nt_mappedmax_2 map_smallRNA_2
ACUGAUUGAGGACUAUGAUAAUCCAAAGGGUUCACCGCCAGCUGGGUCGAAUACCAUUGAAGAUGCAGGAUAUUUCGGUCUUCGACAAC
..((.(((((((((..((((.(((...((.....))....((....((((......))))....)).)))))))..))))))))))).. (-23.40)
ACTGATTGAGGACTATGA.......................................................................	fox_18nt_0016477_0000001 + 1
....ATTGAGGACTATGATAAT...................................................................	fox_18nt_0022884_0000001 + 5

>supercont2.10-_candidate_156_start_1670273_stop_1670007_length_267nt_hairpin_99_209_111nt_mappedmax_1 map_smallRNA_1
GGGCGUGUGGUCUAGGGGUAUGAUGUUCGCUUCGCAUUUUCGUGCAUCUGCGAAAGGUCGAGGGUUCAAUUCCCUCCUCGUCCAAGCUUUACCUUUUUGCUAGUCUCGUGC
(.(((.(((((..(((((((.....(((((...((((....))))....))))).((.((((((..........)))))).))......)))))))..))))..).))).) (-32.80)
GGGCGTGTGGTCTAGGGG.............................................................................................	fox_18nt_0019769_0000001 + 1

>supercont2.10-_candidate_162_start_1816367_stop_1816099_length_269nt_hairpin_85_185_101nt_mappedmax_1 map_smallRNA_1
AACAACUACGAUUCGGCUUCAUGGUCUAGCGGUAUGAUUCUCGCUUUGGGUGCGAGAGGUCCCGGGUUCAAUCCCCGGUGGAGCCCUAAUUGUUUCUUUUU
.......((((((.((((((.................(((((((.......)))))))...(((((.......))))).))))))..))))))........ (-30.70)
...................................................................................CCCTAATTGTTTCTTTTT	fox_18nt_0017136_0000001 + 84

>supercont2.10-_candidate_164_start_1980147_stop_1979859_length_289nt_hairpin_99_188_90nt_mappedmax_4 map_smallRNA_7
UCCGGUGUGGUGUAUCGGUUAUCAUUCCGCGUUUUCAAUUGUUCUGCAAUUAAGCGCCGCGGCGAGCGGGGUUCGACUCCCCGCACCGGA
((((((((((.(..((((.....(((((((......(((((.....)))))...(((....))).)))))))))))..).)))))))))) (-38.40)
TCCGGTGTGGTGTATCGG........................................................................	fox_18nt_0001885_0000020 + 1
TCCGGTGTGGTGTATCGGT.......................................................................	fox_19nt_0001941_0000028 + 1
.CCGGTGTGGTGTATCGGT.......................................................................	fox_18nt_0000749_0000062 + 2
.....................................................................GGTTCGACTCCCCGCACC...	fox_18nt_0008722_0000003 + 70
.....................................................................GGTTCGACTCCCCGCACCG..	fox_19nt_0009274_0000004 + 70
......................................................................GTTCGACTCCCCGCACCG..	fox_18nt_0014846_0000002 + 71
........................................................................TCGACTCCCCGCACCGGA	fox_18nt_0014769_0000002 + 73

>supercont2.10-_candidate_166_start_1981445_stop_1981228_length_218nt_hairpin_36_116_81nt_mappedmax_2 map_smallRNA_2
UUGUCCGCGGUGCCGCUGCUACCAUUGAUCGUGAGAUGGGCUUCAUCGGCCGCCACCUUCUCCACGGCAUCAUCGAGACUC
..(((((.(((((((.((.........(((....))).((((.....))))...........)))))))))..)).))).. (-24.90)
..............................................................CACGGCATCATCGAGACT.	fox_18nt_0018809_0000001 + 63
...............................................................ACGGCATCATCGAGACTC	fox_18nt_0022103_0000001 + 64

>supercont2.10-_candidate_181_start_2204695_stop_2204456_length_240nt_hairpin_4_119_116nt_mappedmax_6 map_smallRNA_4
UCGGCUUAGCGUCUUAGCAGGCGAUUCUUCCACGGCGCUCGAAGCGCGUCGUGGUAUUUCGCGUAUUGUAAUUUCAACACGAGCGGGGUCAAAUCCUUUGCAGACGACUUAGCUGA
((((((.(((((((..(((((.((((...(((((((((.......))))))))).((..(((((.(((......))).))..)))..))..)))).)))))))))).)).)))))) (-44.90)
.............................................................................................TCCTTTGCAGACGACTTAGCTGA	fox_23nt_0006858_0000005 + 94
...............................................................................................CTTTGCAGACGACTTAGCTGA	fox_21nt_0068829_0000001 + 96
................................................................................................TTTGCAGACGACTTAGCTGA	fox_20nt_0008317_0000006 + 97
..................................................................................................TGCAGACGACTTAGCTGA	fox_18nt_0014874_0000002 + 99

>supercont2.10-_candidate_21_start_359825_stop_359606_length_220nt_hairpin_99_186_88nt_mappedmax_3 map_smallRNA_3
AAAGGGCUGCAAAGGCAUACGGGCAUGAUUGCAUUGCGCAUACGGGGAGACUCACGACAUAGACUUGAAUGUCUUGCGCGGAUUCAGA
...(((((((.(((((((.((((((((..(((.....)))...(((....)))....))).).)))).)))))))..)))).)))... (-26.40)
AAAGGGCTGCAAAGGCATACG...................................................................	fox_21nt_0086301_0000001 + 1
.AAGGGCTGCAAAGGCATACG...................................................................	fox_20nt_0053454_0000001 + 2
..AGGGCTGCAAAGGCATACGGG.................................................................	fox_21nt_0078779_0000001 + 3

>supercont2.10-_candidate_5_start_62027_stop_61795_length_233nt_hairpin_9_230_222nt_mappedmax_9 map_smallRNA_9
AUCCACUUUACAUCUUGGGUCCAGAUUGUGGUCCGAGCAUUGCACUUUCACGCUGCAUUUUCAGCCUCAUGAAUUUCCACAAAUAUUACAAUUCUGACGUGAAAUAUUACUGGAGACGAUGAGAUUUGUUGGCGAGCGGCCUCACCGAAGCCCGGGCCAUGGGAACUGGGGAAAUUCGCAUCAUCGUCAAGUUGUGCACUAAUAAGCGAGAUUUUUGGUCAU
....(((..(.((((((..(((((.(..(((((((.((.(((.........(((((.((.((((((((((...((((((..((((((.((.........)).))))))..))))))..)))))....))))).))))))).....))).)).)))))))..)...))))).......(((.((.(.....).))))).........)))))).)..)))... (-56.94)
ATCCACTTTACATCTTGG............................................................................................................................................................................................................	fox_18nt_0022773_0000001 + 1
.....................................................................................................AAATATTACTGGAGACGATGA....................................................................................................	fox_21nt_0025541_0000002 + 102
......................................................................................................AATATTACTGGAGACGATGA....................................................................................................	fox_20nt_0033269_0000002 + 103
.......................................................................................................ATATTACTGGAGACGATGA....................................................................................................	fox_19nt_0007588_0000005 + 104
.......................................................................................................ATATTACTGGAGACGATGAG...................................................................................................	fox_20nt_0023292_0000002 + 104
........................................................................................................TATTACTGGAGACGATGA....................................................................................................	fox_18nt_0007593_0000003 + 105
........................................................................................................TATTACTGGAGACGATGAGA..................................................................................................	fox_20nt_0016593_0000003 + 105
.........................................................................................................ATTACTGGAGACGATGAG...................................................................................................	fox_18nt_0004002_0000007 + 106
.........................................................................................................ATTACTGGAGACGATGAGA..................................................................................................	fox_19nt_0013624_0000003 + 106

>supercont2.10-_candidate_73_start_915553_stop_915321_length_233nt_hairpin_65_126_62nt_mappedmax_1 map_smallRNA_1
CUUUGUUCAAACGCCACACUCAUGUCUCAGACACUAGAAGCUUGAGUGUAGAUUGAUCAAGG
(((((.((((.(...(((((((.(..((........))..).))))))).).)))).))))) (-18.20)
............................................AGTGTAGATTGATCAAGG	fox_18nt_0034218_0000001 + 45

>supercont2.10-_candidate_75_start_918140_stop_917927_length_214nt_hairpin_18_124_107nt_mappedmax_1 map_smallRNA_1
UAUGGAUAUAUGAUGGACUUGAGUGUGCGAUCGAUUGAUUGAUUUGUGCAGCGCGAAGAAUGAUUUUUGUUUUUCGACGACCAAAACUCACGGCAUCUAUGUUCUUG
...(((((((.((((..(.((((((..(((((((....)))).)))..)..(((((((((..(...)..))))))).))......))))).).)))))))))))... (-29.30)
TATGGATATATGATGGAC.........................................................................................	fox_18nt_0042114_0000001 + 1

>supercont2.11+_candidate_116_start_1965565_stop_1965786_length_222nt_hairpin_1_216_216nt_mappedmax_2 map_smallRNA_2
AUAGACAAAGACAAGGACGACCCGCAACUGAGAGAUGUACUUGCUCAGCGACCAGAUGGACCUAACCGUGGUCGAAGAAGACGCGGCCCACCGGCGUAAACGACUGUUGUAGGUUGGCAUACGAACCUGGCUGCUGAGAGGGGACGCUGAACGAGCACGAUUAACGAUUUACGCCAACCGAAAUGUGAUGGGAAGCGCUCUUUGCUUUGGCGUUAU
.....(((((.((((((((..((((..(((((..(.....)..)))))((((((..(((......)))))))))........))))((((..((((((((((...((((.(((((.(....).))))).((((.(.((.(....).)).).).))).))))...)).)))))))).((......))..))))...)).)))))))))))....... (-64.70)
ATAGACAAAGACAAGGAC......................................................................................................................................................................................................	fox_18nt_0020881_0000001 + 1
.TAGACAAAGACAAGGACGA....................................................................................................................................................................................................	fox_19nt_0042463_0000001 + 2

>supercont2.11+_candidate_17_start_817478_stop_817713_length_236nt_hairpin_41_128_88nt_mappedmax_1 map_smallRNA_1
GUAGCUUUCUCAACAUGUCUGCAUCAAUACUCAAGCGAGCAACUUGCUCAAUCGCUAGCAAGACAUACUCUCAUGGACGGAUAGCUGC
((((((.(((...((((............(((....)))...((((((........)))))).........))))...))).)))))) (-21.80)
GTAGCTTTCTCAACATGT......................................................................	fox_18nt_0017504_0000001 + 1

>supercont2.11+_candidate_18_start_817792_stop_818046_length_255nt_hairpin_44_228_185nt_mappedmax_1 map_smallRNA_1
GAGAGUCUUGUUGAAGCUGGUGGAAAAGGUAUGUCAACCACACAAUUGAACUAAACAGGAACUAACUUAAGUACAGUGUAUUGUUUGGAUCGUGCUGAUCAGCCUGACGAAGGAUGGCAUGAAGCUCAAGCACGCGUCGUUCCAGAAUGGGGCGGAUCUCUACACUACCGCAAACAAGACGUAUC
....((((((((...((.(((((....(((......)))...........((((((((..(((.((....))..)))...))))))))..((((((((((((((...(....)..))).)))...)).))))))..(((((((.....))))))).........))))))).))))))))..... (-54.50)
.......................................................................................................................................................................CCGCAAACAAGACGTATC	fox_18nt_0050799_0000001 + 168

>supercont2.11+_candidate_1_start_331016_stop_331242_length_227nt_hairpin_21_127_107nt_mappedmax_3 map_smallRNA_3
CUUUCUCGAGGGUGUCAAGUCAGCGCUCCUCGCAGCAAAGGGAUGCACGUCUGCAGGAAGUAUCCAAGGACGUGUUGAAACAACAGACGGGACAUGGACUGAGAAGG
(((((((.((.(((((..(((.((((.....)).))...(....((((((((...(((....)))..)))))))).....)....)))..)))))...))))))))) (-36.70)
.....................................................................................GACGGGACATGGACTGAG....	fox_18nt_0052792_0000001 + 86
.....................................................................................GACGGGACATGGACTGAGAA..	fox_20nt_0065895_0000001 + 86
.....................................................................................GACGGGACATGGACTGAGAAGG	fox_22nt_0018776_0000002 + 86

>supercont2.11+_candidate_39_start_1033051_stop_1033278_length_228nt_hairpin_97_159_63nt_mappedmax_2 map_smallRNA_2
CAUUUAAGCAAGGAUUGUACGUUCGAAGCGCAAGUCAUGAGAGUAUCAACACAUUGCGAGAUG
(((((..(((((..((((((.((((..((....))..)))).))).)))..).)))).))))) (-15.40)
CATTTAAGCAAGGATTGTAC...........................................	fox_20nt_0093234_0000001 + 1
...TTAAGCAAGGATTGTACG..........................................	fox_18nt_0018361_0000001 + 4

>supercont2.11+_candidate_40_start_1033262_stop_1033547_length_286nt_hairpin_48_193_146nt_mappedmax_2 map_smallRNA_2
CGGAAAUUCCGCUGGGCUCCAAAUGCCAUCUUUUAUAAGAUGAGUCUACGAUAAGAGGCACUUGUUUAUCUGGCCAAGAGCACGGCAUCGUGCUGCAUUGAGGGUACUUCCUCAACAUAAAUCUCUGGAGUCAAGCGGAAUUUUCU
.((((((((((((.(((((((...((((......(((((.((..(((......)))..))))))).....))))....((((((....))))))...(((((((....)))))))..........))))))).)))))))))))). (-57.70)
CGGAAATTCCGCTGGGCTCCA.............................................................................................................................	fox_21nt_0099102_0000001 + 1
.............................................................................................................................TGGAGTCAAGCGGAATTTTC.	fox_20nt_0051018_0000001 + 126

>supercont2.11+_candidate_44_start_1139417_stop_1139625_length_209nt_hairpin_4_140_137nt_mappedmax_1 map_smallRNA_1
UGACCUCAUGAGCCGCAAGUCGCUUGAGGGUAUACCACUUCUCAUCCUGGGGAAUAAGUCCGAUCUUCCGGACAAGCUUUCGGUGGAUGAGUUGAUUGACGAGCUAGACCUGAAGAGCAUACGUGGCCGUGAGGUGU
..((((((((.(((((..((.((((..((((.......(((((......)))))...(((((......))))).((((((((((.((....)).))))).)))))..))))...))))))..))))))))))))).. (-51.10)
TGACCTCATGAGCCGCAAG......................................................................................................................	fox_19nt_0036414_0000001 + 1

>supercont2.11+_candidate_60_start_1443032_stop_1443261_length_230nt_hairpin_63_117_55nt_mappedmax_1 map_smallRNA_1
ACUCACGCAUUCUAUGCGGCUGAUAUUCGAAUGGGAGUUGGUAGAAUGGUAGAGG
.(((((.((((((((.(((((..(((....)))..))))))))))))))).))). (-17.70)
...............................TGGGAGTTGGTAGAATGGTAGAGG	fox_24nt_0008073_0000003 + 32

>supercont2.11+_candidate_75_start_1586558_stop_1586783_length_226nt_hairpin_115_179_65nt_mappedmax_1 map_smallRNA_1
CGCAAGACUGUCACCUCCCUCGACGUAGUCUACGCUCUCAAGCGCCAGGGACGUACCCUCUAUGG
..(((((..((.((.(((((.(((...)))..((((....))))..))))).))))..))).)). (-14.30)
CGCAAGACTGTCACCTCC...............................................	fox_18nt_0013965_0000002 + 1

>supercont2.11+_candidate_7_start_596639_stop_597008_length_370nt_hairpin_66_212_147nt_mappedmax_1 map_smallRNA_1
GUCGCGGAUCGAUUUUCCUUUCUUCUUCAGAUAGACAAGAACGUUCGCCGCACGCUGUCUAGUGUAGAGAGUGGACAGCAUUGUAGGCAGGGUCUUUGGACUCGAGAACAGUUCUUAGAAGAAUAUUGGGAAAUUGGAUCCGUCGUU
..((((((((((((((((.(((((((..........((((((((((((((((.((((((((.(......).))))))))..))).))).(((((....)))))..)))).)))))))))))))....)))))))).)))))).)).. (-57.40)
................................................................................................................................GGAAATTGGATCCGTCGTT	fox_19nt_0057950_0000001 + 129

>supercont2.11-_candidate_101_start_1075651_stop_1075284_length_368nt_hairpin_118_174_57nt_mappedmax_1 map_smallRNA_1
UGAAAUGGCACCUUUGUGUCGAGAUUUGCCAGUCGGCGGCGAAGAGGUAGAAUUUGA
..((((...((((((.(((((.(((......)))..))))).))))))...)))).. (-15.40)
.....................................GGCGAAGAGGTAGAATTTGA	fox_20nt_0089780_0000001 + 38

>supercont2.11-_candidate_117_start_1108069_stop_1107835_length_235nt_hairpin_79_220_142nt_mappedmax_2 map_smallRNA_2
CUCGGACACCGACAACAACACCGACAAUGGUAACUCGGAUGAUGGCAACAGUGGCAACCGCGAUGUCUUCGGUAACAGUGGCGAGGGUGACAAGUCUGCUAAGCAGAAGGCCACCACUGCUGGUAUUGCUGUUGGUGCCGUU
..(((.((((((((.(((.((((.((.((((..(.(((.((.((....))....)).))).)..((((((.((...((((((...(....)..))).)))..)).)))))).)))).)).)))).))).))))))))))).. (-52.60)
CTCGGACACCGACAACAACACC........................................................................................................................	fox_22nt_0083137_0000001 + 1
.TCGGACACCGACAACAACACCGACAATG.................................................................................................................	fox_28nt_0012866_0000002 + 2

>supercont2.11-_candidate_124_start_1142677_stop_1142466_length_212nt_hairpin_145_200_56nt_mappedmax_1 map_smallRNA_1
CUUAUCUUUUGUGACGGAUGAUUAUGAGAAAUGUAACAAGGCACGGAUUGGUUUGG
.((((((........))))))...............((((.((.....)).)))). ( -5.70)
......................................AGGCACGGATTGGTTTGG	fox_18nt_0040724_0000001 + 39

>supercont2.11-_candidate_130_start_1157104_stop_1156884_length_221nt_hairpin_92_175_84nt_mappedmax_2 map_smallRNA_2
UCACAAACGAGAACUCCAUGUACAGAGCCCAGGCGCGAUAUCUAUUGGAGCGAUCUGAUGCUGAGCUGUGGGGUUUCGUGCUGA
...((.((((((.((((((((.(((....(((((((..((.....))..))).))))...))).)).))))))))))))..)). (-27.80)
TCACAAACGAGAACTCCATGTAC.............................................................	fox_23nt_0066619_0000001 + 1
.......CGAGAACTCCATGTACAGAGC........................................................	fox_21nt_0052882_0000001 + 8

>supercont2.11-_candidate_134_start_1159004_stop_1158782_length_223nt_hairpin_38_119_82nt_mappedmax_1 map_smallRNA_1
CUCGAGACUGCCUCGUGCAUCUACAUGAACCGAAUUUCGAGCGAGACGAUUUUCACAACAUGCACGGACGACGGCUCUUCUG
...(((.((((.((((((((.....((((.....((((....)))).....))))....))))))))..).))))))..... (-18.40)
................................................................CGGACGACGGCTCTTCTG	fox_18nt_0021789_0000001 + 65

>supercont2.11-_candidate_160_start_1384878_stop_1384629_length_250nt_hairpin_130_206_77nt_mappedmax_1 map_smallRNA_1
CGGAACCGACGAAGAUGGUCGAGCUGCGCAAGCCAUAGAAGAGUUUGCAACACGCAGUGACUGUGUCUACGGUUUCG
((((((((..((..((((((..((((((((((((......).)))))).....))))))))))).))..)))))))) (-27.80)
CGGAACCGACGAAGATGGT..........................................................	fox_19nt_0024063_0000002 + 1

>supercont2.11-_candidate_39_start_660500_stop_660212_length_289nt_hairpin_24_171_148nt_mappedmax_27 map_smallRNA_27
UCACCCCGUCGUGGCAGUCAGCUCAGGCAGCGAUGAUAUACCCAAAAAGCACCUUAGCGUUUAAUAACUCAUCUAGCCCUCUUGGCCAAGUGGUAAGGCGUCGCACUCGUAAUGCGAAGAUCACUGGUUCGAUUCCAGUACGGGGCAA
...((((((..(((.(((((((.(((...((((((...(((((.....((......)).................(((.....)))...).))))...))))))..(((.....)))......)))))).)))))))..))))))... (-44.70)
.........................................................................................................................CACTGGTTCGATTCCAGTACGG.....	fox_22nt_0006018_0000009 + 122
..........................................................................................................................ACTGGTTCGATTCCAGTAC.......	fox_19nt_0010813_0000003 + 123
..........................................................................................................................ACTGGTTCGATTCCAGTACG......	fox_20nt_0013713_0000003 + 123
..........................................................................................................................ACTGGTTCGATTCCAGTACGG.....	fox_21nt_0002074_0000036 + 123
..........................................................................................................................ACTGGTTCGATTCCAGTACGGG....	fox_22nt_0002032_0000033 + 123
...........................................................................................................................CTGGTTCGATTCCAGTACGG.....	fox_20nt_0003251_0000018 + 124
...........................................................................................................................CTGGTTCGATTCCAGTACGGG....	fox_21nt_0053001_0000001 + 124
............................................................................................................................TGGTTCGATTCCAGTACG......	fox_18nt_0029374_0000001 + 125
............................................................................................................................TGGTTCGATTCCAGTACGG.....	fox_19nt_0006894_0000006 + 125
............................................................................................................................TGGTTCGATTCCAGTACGGG....	fox_20nt_0029443_0000002 + 125
............................................................................................................................TGGTTCGATTCCAGTACGGGG...	fox_21nt_0020029_0000003 + 125
............................................................................................................................TGGTTCGATTCCAGTACGGGGC..	fox_22nt_0023824_0000002 + 125
.............................................................................................................................GGTTCGATTCCAGTACGG.....	fox_18nt_0009047_0000003 + 126
.............................................................................................................................GGTTCGATTCCAGTACGGG....	fox_19nt_0074885_0000001 + 126
.............................................................................................................................GGTTCGATTCCAGTACGGGG...	fox_20nt_0089839_0000001 + 126
.............................................................................................................................GGTTCGATTCCAGTACGGGGC..	fox_21nt_0011862_0000005 + 126
.............................................................................................................................GGTTCGATTCCAGTACGGGGCA.	fox_22nt_0025278_0000002 + 126
..............................................................................................................................GTTCGATTCCAGTACGGG....	fox_18nt_0012699_0000002 + 127
..............................................................................................................................GTTCGATTCCAGTACGGGG...	fox_19nt_0013255_0000003 + 127
..............................................................................................................................GTTCGATTCCAGTACGGGGC..	fox_20nt_0014373_0000003 + 127
..............................................................................................................................GTTCGATTCCAGTACGGGGCA.	fox_21nt_0017601_0000003 + 127
...............................................................................................................................TTCGATTCCAGTACGGGGC..	fox_19nt_0009715_0000004 + 128
...............................................................................................................................TTCGATTCCAGTACGGGGCA.	fox_20nt_0034565_0000001 + 128
................................................................................................................................TCGATTCCAGTACGGGGC..	fox_18nt_0008564_0000003 + 129
................................................................................................................................TCGATTCCAGTACGGGGCA.	fox_19nt_0021312_0000002 + 129
.................................................................................................................................CGATTCCAGTACGGGGCAA	fox_19nt_0010562_0000003 + 130
.................................................................................................................................CGATTCCAGTACGGGGCA.	fox_18nt_0052567_0000001 + 130

>supercont2.11-_candidate_3_start_114290_stop_114073_length_218nt_hairpin_110_185_76nt_mappedmax_4 map_smallRNA_1
CAAGUUGAAGGAUUUUGCAUUUUGUUUGUUUGUUUGUUUUGUUUGUUUGUUUGUUUGUUUGUAUAUUUUUCGUCUG
..((.((((((((..((((........................................)))).)))))))).)). ( -5.70)
..........................................................TTGTATATTTTTCGTCTG	fox_18nt_0051929_0000001 + 59

>supercont2.11-_candidate_43_start_811725_stop_811455_length_271nt_hairpin_7_243_237nt_mappedmax_1 map_smallRNA_1
CGGAUAUGAAUUGAGACAUAGCGGAACCAGACAACAUUGAAACACCAUGACGCUACGAUUGGACUGGCUGCUUUGCAGCUAAACGCGACGACGAUUUCAGACUGGACAAAGAACAUGGGUGUAGCGAGUACAACUGCACAACCAUGGGAACGUGGAAAAGAGGCUUGGCCUCGUGACUGUAUUUUUUUAUUCCUAUACUUGGAGAACUUUUCUGGCGACUGUUCUCAUGCGCAUGCG
..(.((((...(((((.((((((...(((((..........((((((((......((.((((..(((((((...)))))))..).)))))...........((......))..))).)))))...(((((((....(((..(((((....)))))....(((((...))))))))..))))))).....((((.......))))......))))))).)))))))))....))))). (-61.40)
CGGATATGAATTGAGACA...........................................................................................................................................................................................................................	fox_18nt_0031609_0000001 + 1

>supercont2.11-_candidate_52_start_865846_stop_865541_length_306nt_hairpin_145_279_135nt_mappedmax_1 map_smallRNA_1
UUAACCUUAACACCAAUUUCCUGGUGGAGCAAUCCUCCUGGGUUCGAGUCCCAGUCUCAUCAAUGAGUUUCAUUUUUUUACAUCUUACGAUGUUCUUUUUGAUGGAGGGUCUUGGGACAAUGGGGUUAUCGGUUA
.(((((.((((.(((...(((.((.(((....))).)).))).....((((((((((((((((.(((............(((((....))))).))).))))).))))...)))))))..))).))))..))))) (-43.92)
TTAACCTTAACACCAATT.....................................................................................................................	fox_18nt_0001544_0000025 + 1

>supercont2.11-_candidate_69_start_1039939_stop_1039717_length_223nt_hairpin_46_115_70nt_mappedmax_4 map_smallRNA_4
AUGUCUAGUCCGGCCUAUCCUCUAUCAUGGGAUUUAAGGUUCUGUGAUAGUUGAUUGGGCAACUAGAAGU
...((((((...(((((((..((((((((((((.....))))))))))))..)).))))).))))))... (-29.00)
ATGTCTAGTCCGGCCTATCCT.................................................	fox_21nt_0076005_0000001 + 1
.TGTCTAGTCCGGCCTATC...................................................	fox_18nt_0039216_0000001 + 2
....CTAGTCCGGCCTATCCTCT...............................................	fox_19nt_0021423_0000002 + 5
.............................................GATAGTTGATTGGGCAAC.......	fox_18nt_0025104_0000001 + 46

>supercont2.11-_candidate_77_start_1041633_stop_1041299_length_335nt_hairpin_47_184_138nt_mappedmax_1 map_smallRNA_1
AUUCUUGGUGUCGUCUCUGGUCUUCUGCCUUCCGUUGCUCUCUCCAUCCUCAUGUCCUUGGUUCCUGUUUUCAUGCGCCUUUGUGCCAGGCAGGCAGGUUGUGUUUCCAUCUCCCAGGCCGAGCUCUUCACCCAGAAC
.((((.((((..(.(((.((((((((((((.((...((.....(((............))).....))......((((....))))..)).)))))))..(((....))).....))))))))..)..)))).)))). (-35.30)
.......................................................................................................................CGAGCTCTTCACCCAGAAC	fox_19nt_0048087_0000001 + 120

>supercont2.11-_candidate_8_start_187456_stop_187222_length_235nt_hairpin_0_234_235nt_mappedmax_1 map_smallRNA_1
CGGUGGUACUGAAAUGGUUGGCCUCGCUGCCGCUGAGACUGCUAACCCCCGAAAGUCUGUUCCCACUGCCUCCAAGCAGGUCUUUUGGCGUAUUGCUCUCUUCUACGUCAUCAACCUUUUCAUUGUCGGAAUCAUUCUCCGAUCUGAUGAUGAGCGUCUCCUCGGUGCUUCUGGCGCCAACACAAAGGCCUCGCCUUUCGUCCUCGCCAUUCAAGAUGCAGGCAUCAAGGUUCUG
.(((((...(((((.(((.(((((.((....)).(((((.((.((..((((((((((((((.............)))))).))))))).)..)))).........((((((((...........((((((.......)))))).))))))))...)))))...(((((.....))))).......)))))..))))))))...)))))......((((....))))......... (-69.42)
CGGTGGTACTGAAATGGTTGGC.....................................................................................................................................................................................................................	fox_22nt_0048226_0000001 + 1

>supercont2.112-_candidate_1_start_3775_stop_3574_length_202nt_hairpin_80_151_72nt_mappedmax_5 map_smallRNA_5
UCUUGUUGACAUUUCUCUCGACGGAAAAUAAAGUGGGAUCCCGAUCAAAGGCCGAGACGAGCUGUAGCCAGA
(((.((((.((.(((((((...((.........(((....)))........)))))).))).)))))).))) (-14.33)
TCTTGTTGACATTTCTCTCGA...................................................	fox_21nt_0073816_0000001 + 1
..TTGTTGACATTTCTCTCGA...................................................	fox_19nt_0020094_0000002 + 3
..TTGTTGACATTTCTCTCGAC..................................................	fox_20nt_0085137_0000001 + 3
...TGTTGACATTTCTCTCGAC..................................................	fox_19nt_0068880_0000001 + 4
......................................................AGACGAGCTGTAGCCAGA	fox_18nt_0007242_0000003 + 55

>supercont2.112-_candidate_2_start_4057_stop_3831_length_227nt_hairpin_55_129_75nt_mappedmax_15 map_smallRNA_13
AGAUUAUUUUUCUUUUUCUUUCUUUUUCUUUUUUUGCCCUGGAGUGGAAGAGAUGGACGAAACGAUGAAUGAUGA
..(((((((.(((((((((.((((((((.((((.......)))).)))))))).))).)))).)).))))))).. (-15.30)
............................................TGGAAGAGATGGACGAAACGA..........	fox_21nt_0003862_0000018 + 45
.............................................GGAAGAGATGGACGAAACGA..........	fox_20nt_0098521_0000001 + 46
...............................................AAGAGATGGACGAAACGATGAA......	fox_22nt_0057386_0000001 + 48
................................................AGAGATGGACGAAACGATGA.......	fox_20nt_0073100_0000001 + 49
................................................AGAGATGGACGAAACGATGAA......	fox_21nt_0021947_0000002 + 49
................................................AGAGATGGACGAAACGATGAATGA...	fox_24nt_0032691_0000001 + 49
..................................................AGATGGACGAAACGATGAA......	fox_19nt_0007354_0000005 + 51
..................................................AGATGGACGAAACGATGAATGA...	fox_22nt_0011869_0000004 + 51
...................................................GATGGACGAAACGATGAAT.....	fox_19nt_0012208_0000003 + 52
.....................................................TGGACGAAACGATGAATGA...	fox_19nt_0021273_0000002 + 54
.....................................................TGGACGAAACGATGAATGAT..	fox_20nt_0011205_0000004 + 54
.....................................................TGGACGAAACGATGAATGATG.	fox_21nt_0017556_0000003 + 54
.....................................................TGGACGAAACGATGAATGATGA	fox_22nt_0016173_0000003 + 54

>supercont2.115+_candidate_13_start_26837_stop_27085_length_249nt_hairpin_129_204_76nt_mappedmax_15 map_smallRNA_3
CUAAAAAGAAAGCAGUACGCUUCAUAUUUUUUUCUUAUAAGAAAAAAAUAUGUAAAGUUAUUCGCUUUUUUUUAAA
...((((((((((((((.(((((((((((((((((....)))))))))))))..)))))))).))))))))))... (-23.20)
CTAAAAAGAAAGCAGTACG.........................................................	fox_19nt_0012396_0000003 + 1
CTAAAAAGAAAGCAGTACGC........................................................	fox_20nt_0030751_0000002 + 1
CTAAAAAGAAAGCAGTACGCT.......................................................	fox_21nt_0025116_0000002 + 1

>supercont2.115+_candidate_20_start_40516_stop_40911_length_396nt_hairpin_79_271_193nt_mappedmax_23 map_smallRNA_22
GGUUACAGCUGGAGUAUAUUUAUUAAUUCGUUCAUCACCUUUAAUAGAAUAUAGCUCUGCUGUAUUAUUAAUCUGUUUAUGAUUAGGAGCUAUUACUACAAUAUUUAGUUCAUUAAUAGGAUUAUUUCAACAAGAUAUAAAAAAAAUUAUCGCAUAUUCUACUAUGAGUCAAUUAGGUAUGAUGGUAAUAGCU
...((((((.((((((((((((((((...((.....))..))))).)))))).)))))))))))...((((((.......)))))).(((((((((((..((((((((((.(((.((((((.....)).....((((..........))))..........)))).))).))))))))))..))))))))))) (-44.30)
.....CAGCTGGAGTATATTTATTAAT......................................................................................................................................................................	fox_22nt_0061569_0000001 + 6
.........................................TAATAGAATATAGCTCTGCT....................................................................................................................................	fox_20nt_0064543_0000001 + 42
.........................................TAATAGAATATAGCTCTGCTGTA.................................................................................................................................	fox_23nt_0021510_0000002 + 42
..........................................AATAGAATATAGCTCTGCTG...................................................................................................................................	fox_20nt_0078390_0000001 + 43
..........................................AATAGAATATAGCTCTGCTGT..................................................................................................................................	fox_21nt_0100898_0000001 + 43
..........................................AATAGAATATAGCTCTGCTGTA.................................................................................................................................	fox_22nt_0047142_0000001 + 43
...........................................ATAGAATATAGCTCTGCTGTA.................................................................................................................................	fox_21nt_0027960_0000002 + 44
............................................TAGAATATAGCTCTGCTGTA.................................................................................................................................	fox_20nt_0099201_0000001 + 45
.............................................AGAATATAGCTCTGCTGT..................................................................................................................................	fox_18nt_0008468_0000003 + 46
..............................................................................................ACTACAATATTTAGTTCATT...............................................................................	fox_20nt_0064813_0000001 + 95
................................................................................................TACAATATTTAGTTCATTAATA...........................................................................	fox_22nt_0018261_0000002 + 97
...............................................................................................................................................................TACTATGAGTCAATTAGGT...............	fox_19nt_0030343_0000001 + 160
...............................................................................................................................................................TACTATGAGTCAATTAGGTATGATGG........	fox_26nt_0029128_0000001 + 160
..................................................................................................................................................................TATGAGTCAATTAGGTATG............	fox_19nt_0060990_0000001 + 163
..................................................................................................................................................................TATGAGTCAATTAGGTATGA...........	fox_20nt_0027831_0000002 + 163
..................................................................................................................................................................TATGAGTCAATTAGGTATGATG.........	fox_22nt_0065434_0000001 + 163
...................................................................................................................................................................ATGAGTCAATTAGGTATGA...........	fox_19nt_0023877_0000002 + 164
....................................................................................................................................................................TGAGTCAATTAGGTATGATGG........	fox_21nt_0050600_0000001 + 165
....................................................................................................................................................................TGAGTCAATTAGGTATGATGGT.......	fox_22nt_0019530_0000002 + 165
...........................................................................................................................................................................ATTAGGTATGATGGTAATAGC.	fox_21nt_0052933_0000001 + 172
............................................................................................................................................................................TTAGGTATGATGGTAATAGC.	fox_20nt_0015611_0000003 + 173
.............................................................................................................................................................................TAGGTATGATGGTAATAGCT	fox_20nt_0018307_0000003 + 174

>supercont2.115+_candidate_23_start_43358_stop_43750_length_393nt_hairpin_19_149_131nt_mappedmax_2 map_smallRNA_3
GUUCACAGUAAGGUGCACCCAAGCUCCAUAUAGUGGGGGAGGAGGGUAUUCCCUCCGGGAAUCGCGCAAGCUCGAAAAAAAAUACAUUUUUAGGCGCGAACGAAGUUCCUACCCCGCGCCUUACUGUGGGC
((((((((((((((((.(((..(((......)))..))).((((((....)))))).(((((..((...(((..((((........))))..))).....))..)))))......)))))))))))))))) (-58.50)
........................................................................................TTTAGGCGCGAACGAAGT.........................	fox_18nt_0013586_0000002 + 89
................................................................................................................CCCGCGCCTTACTGTGGGC	fox_19nt_0083015_0000001 + 113
.................................................................................................................CCGCGCCTTACTGTGGGC	fox_18nt_0005760_0000004 + 114

>supercont2.115+_candidate_24_start_43670_stop_44087_length_418nt_hairpin_82_152_71nt_mappedmax_18 map_smallRNA_3
GACGCUUCACAACCUAGUAAUAUAAGUUACUUAUGAAAUUUCGGAUCUUUAUUAUUAGUUUGUUUAGUUAU
...(((..((((.(((((((((.(((.......(((....)))...)))))))))))).))))..)))... (-11.90)
...GCTTCACAACCTAGTAATA.................................................	fox_19nt_0044592_0000001 + 4
....CTTCACAACCTAGTAATATAAG.............................................	fox_22nt_0081561_0000001 + 5
.................................................TATTATTAGTTTGTTTAGT...	fox_19nt_0048142_0000001 + 50

>supercont2.115-_candidate_15_start_25693_stop_25358_length_336nt_hairpin_12_215_204nt_mappedmax_21 map_smallRNA_14
UGUAUAAUCAUUAUUUGAAUAAUAAUUGUUAUUUGUAUAAUCAUUAUUUGAAUAAUAAUUGUUAUUUGUAUAAUUAUUAUUUCUAGAAUAACCAUCAUUAGCUACGCCUGUUUUAGAGUUUCUUAUGUAUGAGCCUCCAUAAUAUUUCCCUCAUAAAUUUGAAUAAAUAAAAAUAAAAGGUUUAACUACUAGAAAUUCUAGUAU
...(((((.(((((.((((((((((((((((((((.(((.....))).)))))))))))))))))))).))))).)))))................................(((((((((((...((((((((((......(((((...(((......)))..)))))........)))))))..))).)))))))))))... (-37.64)
...........TATTTGAATAATAATTGTTA.............................................................................................................................................................................	fox_20nt_0062812_0000001 + 12
............ATTTGAATAATAATTGTTATT...........................................................................................................................................................................	fox_21nt_0017470_0000003 + 13
............................................TATTTGAATAATAATTGTTA............................................................................................................................................	fox_20nt_0062812_0000001 + 45
.............................................ATTTGAATAATAATTGTTATT..........................................................................................................................................	fox_21nt_0017470_0000003 + 46
..............................................................................................................TTTTAGAGTTTCTTATGTATG.........................................................................	fox_21nt_0015870_0000003 + 111
...............................................................................................................TTTAGAGTTTCTTATGTATGA........................................................................	fox_21nt_0024830_0000002 + 112
...............................................................................................................TTTAGAGTTTCTTATGTATGAGC......................................................................	fox_23nt_0018318_0000002 + 112
................................................................................................................TTAGAGTTTCTTATGTATGAGC......................................................................	fox_22nt_0020119_0000002 + 113
................................................................................................................TTAGAGTTTCTTATGTATGAGCC.....................................................................	fox_23nt_0045472_0000001 + 113
.................................................................................................................TAGAGTTTCTTATGTATGAGC......................................................................	fox_21nt_0018523_0000003 + 114
.................................................................................................................TAGAGTTTCTTATGTATGAGCC.....................................................................	fox_22nt_0016699_0000003 + 114
..................................................................................................................AGAGTTTCTTATGTATGAGCC.....................................................................	fox_21nt_0074037_0000001 + 115
...................................................................................................................GAGTTTCTTATGTATGAGC......................................................................	fox_19nt_0009080_0000004 + 116
......................................................................................................................................................................................TAACTACTAGAAATTCTAG...	fox_19nt_0066685_0000001 + 183

>supercont2.115-_candidate_1_start_473_stop_0_length_474nt_hairpin_0_473_474nt_mappedmax_25 map_smallRNA_15
UCAAUAUACAAUGUCAAAUUCUAAUAAAUAACCUCCUAAAAAUAAAAUACUAGUAAAUAUACACAUUAAUACAAUACUAGCAUAUUCAGCUAAGAAGAAAAAGACAAAUAUUACUGCAGCGUGUUCUGUCAUAAAUCCACUUACCAGUUCAGAUUCAGCCUCUGCUAAAUCAAAUGGUGCUCUAUUAGUCUCUGCCACAGAUCCUAUAAAGAAUAUUAUUAAUAUACAUAAUAGGGGUAAAGCUAAUCAUACUAUUUUUUGGAAUUGUACAUUUAUAUUUAAAUUUAAGCUAUUUGUUAUCAUUAUUAUUAUUAGGGAGACAGAACUUAACACUAAUUCGUAGCUAAUUAAUUGAGCUGUAAUAUUAAAGAUCCUAAGAAAGCAUACUUACUAUUAGCACUUCAUCCUGCAAGUAAACGGAGUAAGAGCAAGAGAUGAAACUGCCUGCAUAUACCACUUCCUAAACGAUUCCCG
..((((((.(((((..((((((((.((((((((.((((...........((((((..(((........)))...)))))).((((((.(((((..(((....(((((((((.........))))).))))...........(((((.....((((.(((....))).))))...))))).))).))))).((((...)))).........))))))...............)))))))..............))))).))))))))..)))))))))))................................((((((((..............(((((..(((((.........)))))..).))))..............(((..((((((......(((((.....).))))......)))))).(((...........))).)))........)))))))).......... (-69.83)
TCAATATACAATGTCAAATT......................................................................................................................................................................................................................................................................................................................................................................................................................................................................	fox_20nt_0030073_0000002 + 1
....TATACAATGTCAAATTCTAA..................................................................................................................................................................................................................................................................................................................................................................................................................................................................	fox_20nt_0083356_0000001 + 5
.........................................................................................................................................................................................................................................................TACTATTTTTTGGAATTGTACA...........................................................................................................................................................................................................	fox_22nt_0006663_0000008 + 250
...........................................................................................................................................................................................................................................................CTATTTTTTGGAATTGTACA...........................................................................................................................................................................................................	fox_20nt_0027692_0000002 + 252
............................................................................................................................................................................................................................................................TATTTTTTGGAATTGTAC............................................................................................................................................................................................................	fox_18nt_0047928_0000001 + 253
............................................................................................................................................................................................................................................................TATTTTTTGGAATTGTACA...........................................................................................................................................................................................................	fox_19nt_0082077_0000001 + 253
............................................................................................................................................................................................................................................................TATTTTTTGGAATTGTACAT..........................................................................................................................................................................................................	fox_20nt_0044703_0000001 + 253
............................................................................................................................................................................................................................................................TATTTTTTGGAATTGTACATT.........................................................................................................................................................................................................	fox_21nt_0033934_0000002 + 253
...............................................................................................................................................................................................................................................................TTTTTGGAATTGTACATTTATA.....................................................................................................................................................................................................	fox_22nt_0022885_0000002 + 256
................................................................................................................................................................................................................................................................TTTTGGAATTGTACATTTAT......................................................................................................................................................................................................	fox_20nt_0049756_0000001 + 257
................................................................................................................................................................................................................................................................TTTTGGAATTGTACATTTATA.....................................................................................................................................................................................................	fox_21nt_0007392_0000008 + 257
.................................................................................................................................................................................................................................................................TTTGGAATTGTACATTTATA.....................................................................................................................................................................................................	fox_20nt_0009292_0000005 + 258
.................................................................................................................................................................................................................................................................TTTGGAATTGTACATTTATATT...................................................................................................................................................................................................	fox_22nt_0018248_0000002 + 258
..................................................................................................................................................................................................................................................................TTGGAATTGTACATTTATA.....................................................................................................................................................................................................	fox_19nt_0037210_0000001 + 259
..................................................................................................................................................................................................................................................................TTGGAATTGTACATTTATATTTA.................................................................................................................................................................................................	fox_23nt_0040497_0000001 + 259

>supercont2.115-_candidate_26_start_40900_stop_40457_length_444nt_hairpin_239_305_67nt_mappedmax_20 map_smallRNA_9
UAAUACAGCAGAGCUAUAUUCUAUUAAAGGUGAUGAACGAAUUAAUAAAUAUACUCCAGCUGUAACC
...((((((.(((.((((((.((((((..((.....))...)))))))))))))))..))))))... (-15.80)
...TACAGCAGAGCTATATTCTATT..........................................	fox_22nt_0034020_0000001 + 4
......AGCAGAGCTATATTCTATT..........................................	fox_19nt_0049326_0000001 + 7
.........AGAGCTATATTCTATTAAAGG.....................................	fox_21nt_0040715_0000001 + 10
............GCTATATTCTATTAAAGG.....................................	fox_18nt_0022912_0000001 + 13
............GCTATATTCTATTAAAGGTGA..................................	fox_21nt_0022866_0000002 + 13
..........................................TAATAAATATACTCCAGCTGT....	fox_21nt_0036780_0000002 + 43
...........................................AATAAATATACTCCAGCTGT....	fox_20nt_0091200_0000001 + 44
.............................................TAAATATACTCCAGCTGTAACC	fox_22nt_0076814_0000001 + 46
...............................................AATATACTCCAGCTGTAACC	fox_20nt_0083760_0000001 + 48

>supercont2.115-_candidate_28_start_43589_stop_43368_length_222nt_hairpin_34_93_60nt_mappedmax_2 map_smallRNA_2
CUAUAAUGGGUAUAUAUUUAUUUAUUUUUUUUUUAGUAAUAUUAGGUAGCCCACAGUAAG
.(((..(((((...((((((.(((((........)))))...)))))))))))..))).. ( -9.40)
.....................................AATATTAGGTAGCCCACAGT...	fox_20nt_0031170_0000002 + 38
.......................................TATTAGGTAGCCCACAGTAAG	fox_21nt_0059163_0000001 + 40

>supercont2.115-_candidate_29_start_43664_stop_43448_length_217nt_hairpin_109_168_60nt_mappedmax_3 map_smallRNA_2
CUAUAAUGGGUAUAUAUUUAUUUAUUUUUUUUUUAGUAAUAUUAGGUAGCCCACAGUAAG
.(((..(((((...((((((.(((((........)))))...)))))))))))..))).. ( -9.40)
.....................................AATATTAGGTAGCCCACAGT...	fox_20nt_0031170_0000002 + 38
.......................................TATTAGGTAGCCCACAGTAAG	fox_21nt_0059163_0000001 + 40

>supercont2.116+_candidate_10_start_2548_stop_2887_length_340nt_hairpin_130_213_84nt_mappedmax_2 map_smallRNA_2
AAUGGACAAUAGUAAAAACAAAGAACCUCACAGUGUAUAUAAAAAUAAAUAGUAGCUCGCACUUACUUUAUUAUCUGAUCCAUA
.(((((((((((((((......(.....)..(((((.(((...........)))....)))))...)))))))).)).))))). (-10.50)
AATGGACAATAGTAAAAAC.................................................................	fox_19nt_0009830_0000004 + 1
.ATGGACAATAGTAAAAAC.................................................................	fox_18nt_0004009_0000007 + 2

>supercont2.116+_candidate_18_start_9278_stop_9522_length_245nt_hairpin_20_149_130nt_mappedmax_8 map_smallRNA_7
CGCCCCAUCCUUUGUUAGCAAGCUCGCUCUACUAUUAGCCGUAAUAGCUCCAGUUAGCACAAGCUACUUUUUAUAGCAUAGCUAUGAAUACGAGGAGCUUUGCUAAGCCUUGUUAACGAAGAGAGGGGCU
.(((((.(((((((((((((((((.(((........))).((((.((((((...((((....))))...((((((((...)))))))).....))))))))))..)).))))))))))))).))))))). (-53.10)
..CCCCATCCTTTGTTAGCAAGC...........................................................................................................	fox_21nt_0026727_0000002 + 3
........................................................................................TACGAGGAGCTTTGCTAAGC......................	fox_20nt_0105424_0000001 + 89
........................................................................................................AAGCCTTGTTAACGAAGAGAGG....	fox_22nt_0072941_0000001 + 105
.........................................................................................................AGCCTTGTTAACGAAGAGAG.....	fox_20nt_0075335_0000001 + 106
............................................................................................................CTTGTTAACGAAGAGAGGGGC.	fox_21nt_0058940_0000001 + 109
.............................................................................................................TTGTTAACGAAGAGAGGG...	fox_18nt_0039734_0000001 + 110
.............................................................................................................TTGTTAACGAAGAGAGGGGC.	fox_20nt_0067972_0000001 + 110

>supercont2.116+_candidate_25_start_12226_stop_12442_length_217nt_hairpin_106_173_68nt_mappedmax_4 map_smallRNA_2
GCGCCUAUAAUGGGUAUAUAUUUAUUUAUUUUUUUUUUAGUAAUAUUAGGUAGCCCACAGUAAGGCGC
((((((((..(((((...((((((.(((((........)))))...)))))))))))..)).)))))) (-19.80)
.........................................AATATTAGGTAGCCCACAGT.......	fox_20nt_0031170_0000002 + 42
...........................................TATTAGGTAGCCCACAGTAAG....	fox_21nt_0059163_0000001 + 44

>supercont2.116+_candidate_26_start_12301_stop_12522_length_222nt_hairpin_35_94_60nt_mappedmax_2 map_smallRNA_2
CUAUAAUGGGUAUAUAUUUAUUUAUUUUUUUUUUAGUAAUAUUAGGUAGCCCACAGUAAG
.(((..(((((...((((((.(((((........)))))...)))))))))))..))).. ( -9.40)
.....................................AATATTAGGTAGCCCACAGT...	fox_20nt_0031170_0000002 + 38
.......................................TATTAGGTAGCCCACAGTAAG	fox_21nt_0059163_0000001 + 40

>supercont2.116+_candidate_3_start_726_stop_1079_length_354nt_hairpin_123_303_181nt_mappedmax_2 map_smallRNA_1
UGUUAGUUAAAGAUAGAUGUAAGUUACCACCUAAAACUUCUAAAUUUAAUAUGUCUCUUAUUUCAAAUUGAUCUAAAGGACUUCUUAUUUCUUCAGCUUGCGCUAAGAAUAAAUUUUGUUUUUCUAUAGAAAACAUCUAGUAGUAUUAUUACUACUAUAAUAUAUAAAUCUUUAAAAAGCU
.(((..((((((((..(((((.(((.......(((((....(((((((....(((..(((..((.....))..)))..))).......(((((.(((....))))))))))))))).))))).........)))...((((((((....))))))))...)))))..))))))))..))). (-34.59)
TGTTAGTTAAAGATAGATG..................................................................................................................................................................	fox_19nt_0009750_0000004 + 1

>supercont2.116+_candidate_5_start_1305_stop_1638_length_334nt_hairpin_38_314_277nt_mappedmax_4 map_smallRNA_4
GUUUUAUUAUUUUUUUUUUAUUAAAAUAUUGCUUAUUUUAGUUAUAUUUAUAGCUAUAGCAUUAUUAAUGCGGGCUUUUAGCUUUUAGAUUGCUUUUAGCACCCGAAGGAAUAUGGAUAGCACUAAUAUAUAUUAUAUUUUAUUAAUAAACAUACGUGAUAAGAAUAAACGCACUAUUCUUGGUAAUAUAUAUUUAGAUAAUACGUAUAGAAUAAAUACUAUUAUAGCAAAAGCAAAUACUAUUUCAUUCAUAUAAUAAAAAGGUACUAAUUGUGGC
(((..((((...(((((((((((.((((.((((.....(((((((....))))))).)))).)))).....(((((...(((.........)))...))).)).(((((((((......((...((((((((((((.............((....))..((((((((.......))))))))))))))))))))...((((((.((((.......)))))))))).......))......)))))).)))...)))))))))))...))))...))) (-45.80)
.............................................................................................................................................................................................................................................................TAATAAAAAGGTACTAATTGT...	fox_21nt_0066934_0000001 + 254
..............................................................................................................................................................................................................................................................AATAAAAAGGTACTAATTGTGG.	fox_22nt_0081413_0000001 + 255
...............................................................................................................................................................................................................................................................ATAAAAAGGTACTAATTGTGG.	fox_21nt_0052953_0000001 + 256
...............................................................................................................................................................................................................................................................ATAAAAAGGTACTAATTGTGGC	fox_22nt_0061152_0000001 + 256

>supercont2.116+_candidate_8_start_1768_stop_2167_length_400nt_hairpin_38_300_263nt_mappedmax_4 map_smallRNA_3
AUUAAAGAAGGAUAUACACCUAAUAUAACUGUAAAUAAUACUAAUAUAAAUAAUAAGAUAAAUUCUCUUUUAUUUACAUCGUAUAUACUUUCUUCUAAGAAUCUAGUGAAAGAACCACCGAAAGAUAUUCUAUUAAACAUAUAUAUAGUGUAGGCUGCAGAAAAUACUACAGAAGAGCAAGCGAAAACACCUAAUACUGGUAAUCUUUCUAUUAUACUAUAAAGUGACAUAAAUUCACCUACGAAAUUUAAAGUUAAUGGAGC
....(((((((((((((.............(((.....))).....(((((((..(((.....)))...)))))))....)))))).)))))))......((((.(((.......)))....)))).(((((((((.......((((((((((.(((.((......)).)))..........((((..(((.......)))....))))..))))))))))..((((.......))))...............))))))))). (-39.00)
................................................................................GTATATACTTTCTTCTAA.....................................................................................................................................................................	fox_18nt_0042451_0000001 + 81
.................................................................................TATATACTTTCTTCTAAG....................................................................................................................................................................	fox_18nt_0022328_0000001 + 82
.....................................................................................................................................................................................................................................................ATTTAAAGTTAATGGAGC	fox_18nt_0054396_0000001 + 246

>supercont2.116-_candidate_11_start_12532_stop_12140_length_393nt_hairpin_18_148_131nt_mappedmax_2 map_smallRNA_3
GUUCACAGUAAGGUGCACCCAAGCUCCAUAUAGUGGGGGAGGAGGGUAUUCCCUCCGGGAAUCGCGCAAGCUCGAAAAAAAAUACAUUUUUAGGCGCGAACGAAGUUCCUACCCCGCGCCUUACUGUGGGC
((((((((((((((((.(((..(((......)))..))).((((((....)))))).(((((..((...(((..((((........))))..))).....))..)))))......)))))))))))))))) (-58.50)
........................................................................................TTTAGGCGCGAACGAAGT.........................	fox_18nt_0013586_0000002 + 89
................................................................................................................CCCGCGCCTTACTGTGGGC	fox_19nt_0083015_0000001 + 113
.................................................................................................................CCGCGCCTTACTGTGGGC	fox_18nt_0005760_0000004 + 114

>supercont2.116-_candidate_9_start_11505_stop_11288_length_218nt_hairpin_56_210_155nt_mappedmax_4 map_smallRNA_4
AAUUCAGUUAAUAAAUAUGGUUUACAUAAUUUUGCCUUUAUUGUAUUAGAAUUAUUCCCUGAAAUAGUUAAUCAAGAAAAUAAUAAAAAAUUAUUAGAUUUAGAAGAUUUUUAUCUAAAAUCUCUUUUACCUGACUAUAAUAUAUUAACCGAAGC
..(((.(((((((..(((((((...((((((((....(((((.......(((((((......))))))).........)))))...))))))))......(((((((..(((.....)))..)))))))...)))))))...))))))).))).. (-22.49)
..TTCAGTTAATAAATATGGTT.....................................................................................................................................	fox_20nt_0103718_0000001 + 3
...................................................................................................................................TGACTATAATATATTAACCG....	fox_20nt_0021560_0000002 + 132
......................................................................................................................................CTATAATATATTAACCGAAG.	fox_20nt_0092751_0000001 + 135
......................................................................................................................................CTATAATATATTAACCGAAGC	fox_21nt_0105082_0000001 + 135

>supercont2.117+_candidate_10_start_2640_stop_2979_length_340nt_hairpin_130_213_84nt_mappedmax_2 map_smallRNA_2
AAUGGACAAUAGUAAAAACAAAGAACCUCACAGUGUAUAUAAAAAUAAAUAGUAGCUCGCACUUACUUUAUUAUCUGAUCCAUA
.(((((((((((((((......(.....)..(((((.(((...........)))....)))))...)))))))).)).))))). (-10.50)
AATGGACAATAGTAAAAAC.................................................................	fox_19nt_0009830_0000004 + 1
.ATGGACAATAGTAAAAAC.................................................................	fox_18nt_0004009_0000007 + 2

>supercont2.117+_candidate_18_start_9370_stop_9614_length_245nt_hairpin_20_149_130nt_mappedmax_8 map_smallRNA_7
CGCCCCAUCCUUUGUUAGCAAGCUCGCUCUACUAUUAGCCGUAAUAGCUCCAGUUAGCACAAGCUACUUUUUAUAGCAUAGCUAUGAAUACGAGGAGCUUUGCUAAGCCUUGUUAACGAAGAGAGGGGCU
.(((((.(((((((((((((((((.(((........))).((((.((((((...((((....))))...((((((((...)))))))).....))))))))))..)).))))))))))))).))))))). (-53.10)
..CCCCATCCTTTGTTAGCAAGC...........................................................................................................	fox_21nt_0026727_0000002 + 3
........................................................................................TACGAGGAGCTTTGCTAAGC......................	fox_20nt_0105424_0000001 + 89
........................................................................................................AAGCCTTGTTAACGAAGAGAGG....	fox_22nt_0072941_0000001 + 105
.........................................................................................................AGCCTTGTTAACGAAGAGAG.....	fox_20nt_0075335_0000001 + 106
............................................................................................................CTTGTTAACGAAGAGAGGGGC.	fox_21nt_0058940_0000001 + 109
.............................................................................................................TTGTTAACGAAGAGAGGG...	fox_18nt_0039734_0000001 + 110
.............................................................................................................TTGTTAACGAAGAGAGGGGC.	fox_20nt_0067972_0000001 + 110

>supercont2.117+_candidate_19_start_9473_stop_9738_length_266nt_hairpin_5_62_58nt_mappedmax_1 map_smallRNA_6
UACGAGGAGCUUUGCUAAGCCUUGUUAACGAAGAGAGGGGCUUUGCUAAGCCUUCAUA
...((((.((((.((.((((((..((.......))..)))))).)).))))))))... (-20.80)
TACGAGGAGCTTTGCTAAGC......................................	fox_20nt_0105424_0000001 + 1
................AAGCCTTGTTAACGAAGAGAGG....................	fox_22nt_0072941_0000001 + 17
.................AGCCTTGTTAACGAAGAGAG.....................	fox_20nt_0075335_0000001 + 18
....................CTTGTTAACGAAGAGAGGGGC.................	fox_21nt_0058940_0000001 + 21
.....................TTGTTAACGAAGAGAGGG...................	fox_18nt_0039734_0000001 + 22
.....................TTGTTAACGAAGAGAGGGGC.................	fox_20nt_0067972_0000001 + 22

>supercont2.117+_candidate_26_start_12320_stop_12536_length_217nt_hairpin_106_173_68nt_mappedmax_4 map_smallRNA_2
GCGCCUAUAAUGGGUAUAUAUUUAUUUAUUUUUUUUUUAGUAAUAUUAGGUAGCCCACAGUAAGGCGC
((((((((..(((((...((((((.(((((........)))))...)))))))))))..)).)))))) (-19.80)
.........................................AATATTAGGTAGCCCACAGT.......	fox_20nt_0031170_0000002 + 42
...........................................TATTAGGTAGCCCACAGTAAG....	fox_21nt_0059163_0000001 + 44

>supercont2.117+_candidate_27_start_12395_stop_12616_length_222nt_hairpin_35_94_60nt_mappedmax_2 map_smallRNA_2
CUAUAAUGGGUAUAUAUUUAUUUAUUUUUUUUUUAGUAAUAUUAGGUAGCCCACAGUAAG
.(((..(((((...((((((.(((((........)))))...)))))))))))..))).. ( -9.40)
.....................................AATATTAGGTAGCCCACAGT...	fox_20nt_0031170_0000002 + 38
.......................................TATTAGGTAGCCCACAGTAAG	fox_21nt_0059163_0000001 + 40

>supercont2.117+_candidate_3_start_818_stop_1171_length_354nt_hairpin_123_303_181nt_mappedmax_2 map_smallRNA_1
UGUUAGUUAAAGAUAGAUGUAAGUUACCACCUAAAACUUCUAAAUUUAAUAUGUCUCUUAUUUCAAAUUGAUCUAAAGGACUUCUUAUUUCUUCAGCUUGCGCUAAGAAUAAAUUUUGUUUUUCUAUAGAAAACAUCUAGUAGUAUUAUUACUACUAUAAUAUAUAAAUCUUUAAAAAGCU
.(((..((((((((..(((((.(((.......(((((....(((((((....(((..(((..((.....))..)))..))).......(((((.(((....))))))))))))))).))))).........)))...((((((((....))))))))...)))))..))))))))..))). (-34.59)
TGTTAGTTAAAGATAGATG..................................................................................................................................................................	fox_19nt_0009750_0000004 + 1

>supercont2.117+_candidate_5_start_1397_stop_1730_length_334nt_hairpin_38_314_277nt_mappedmax_4 map_smallRNA_4
GUUUUAUUAUUUUUUUUUUAUUAAAAUAUUGCUUAUUUUAGUUAUAUUUAUAGCUAUAGCAUUAUUAAUGCGGGCUUUUAGCUUUUAGAUUGCUUUUAGCACCCGAAGGAAUAUGGAUAGCACUAAUAUAUAUUAUAUUUUAUUAAUAAACAUACGUGAUAAGAAUAAACGCACUAUUCUUGGUAAUAUAUAUUUAGAUAAUACGUAUAGAAUAAAUACUAUUAUAGCAAAAGCAAAUACUAUUUCAUUCAUAUAAUAAAAAGGUACUAAUUGUGGC
(((..((((...(((((((((((.((((.((((.....(((((((....))))))).)))).)))).....(((((...(((.........)))...))).)).(((((((((......((...((((((((((((.............((....))..((((((((.......))))))))))))))))))))...((((((.((((.......)))))))))).......))......)))))).)))...)))))))))))...))))...))) (-45.80)
.............................................................................................................................................................................................................................................................TAATAAAAAGGTACTAATTGT...	fox_21nt_0066934_0000001 + 254
..............................................................................................................................................................................................................................................................AATAAAAAGGTACTAATTGTGG.	fox_22nt_0081413_0000001 + 255
...............................................................................................................................................................................................................................................................ATAAAAAGGTACTAATTGTGG.	fox_21nt_0052953_0000001 + 256
...............................................................................................................................................................................................................................................................ATAAAAAGGTACTAATTGTGGC	fox_22nt_0061152_0000001 + 256

>supercont2.117+_candidate_8_start_1860_stop_2259_length_400nt_hairpin_38_300_263nt_mappedmax_4 map_smallRNA_3
AUUAAAGAAGGAUAUACACCUAAUAUAACUGUAAAUAAUACUAAUAUAAAUAAUAAGAUAAAUUCUCUUUUAUUUACAUCGUAUAUACUUUCUUCUAAGAAUCUAGUGAAAGAACCACCGAAAGAUAUUCUAUUAAACAUAUAUAUAGUGUAGGCUGCAGAAAAUACUACAGAAGAGCAAGCGAAAACACCUAAUACUGGUAAUCUUUCUAUUAUACUAUAAAGUGACAUAAAUUCACCUACGAAAUUUAAAGUUAAUGGAGC
....(((((((((((((.............(((.....))).....(((((((..(((.....)))...)))))))....)))))).)))))))......((((.(((.......)))....)))).(((((((((.......((((((((((.(((.((......)).)))..........((((..(((.......)))....))))..))))))))))..((((.......))))...............))))))))). (-39.00)
................................................................................GTATATACTTTCTTCTAA.....................................................................................................................................................................	fox_18nt_0042451_0000001 + 81
.................................................................................TATATACTTTCTTCTAAG....................................................................................................................................................................	fox_18nt_0022328_0000001 + 82
.....................................................................................................................................................................................................................................................ATTTAAAGTTAATGGAGC	fox_18nt_0054396_0000001 + 246

>supercont2.117-_candidate_11_start_12626_stop_12234_length_393nt_hairpin_18_148_131nt_mappedmax_2 map_smallRNA_3
GUUCACAGUAAGGUGCACCCAAGCUCCAUAUAGUGGGGGAGGAGGGUAUUCCCUCCGGGAAUCGCGCAAGCUCGAAAAAAAAUACAUUUUUAGGCGCGAACGAAGUUCCUACCCCGCGCCUUACUGUGGGC
((((((((((((((((.(((..(((......)))..))).((((((....)))))).(((((..((...(((..((((........))))..))).....))..)))))......)))))))))))))))) (-58.50)
........................................................................................TTTAGGCGCGAACGAAGT.........................	fox_18nt_0013586_0000002 + 89
................................................................................................................CCCGCGCCTTACTGTGGGC	fox_19nt_0083015_0000001 + 113
.................................................................................................................CCGCGCCTTACTGTGGGC	fox_18nt_0005760_0000004 + 114

>supercont2.117-_candidate_9_start_11599_stop_11382_length_218nt_hairpin_56_210_155nt_mappedmax_4 map_smallRNA_4
AAUUCAGUUAAUAAAUAUGGUUUACAUAAUUUUGCCUUUAUUGUAUUAGAAUUAUUCCCUGAAAUAGUUAAUCAAGAAAAUAAUAAAAAAUUAUUAGAUUUAGAAGAUUUUUAUCUAAAAUCUCUUUUACCUGACUAUAAUAUAUUAACCGAAGC
..(((.(((((((..(((((((...((((((((....(((((.......(((((((......))))))).........)))))...))))))))......(((((((..(((.....)))..)))))))...)))))))...))))))).))).. (-22.49)
..TTCAGTTAATAAATATGGTT.....................................................................................................................................	fox_20nt_0103718_0000001 + 3
...................................................................................................................................TGACTATAATATATTAACCG....	fox_20nt_0021560_0000002 + 132
......................................................................................................................................CTATAATATATTAACCGAAG.	fox_20nt_0092751_0000001 + 135
......................................................................................................................................CTATAATATATTAACCGAAGC	fox_21nt_0105082_0000001 + 135

>supercont2.12+_candidate_13_start_80559_stop_80779_length_221nt_hairpin_3_215_213nt_mappedmax_1 map_smallRNA_1
UCUUCUAAGGGGCAUAUCCCGCAUACCCUGGUCUCAUAUCUUGAACGUGUCGCUUAAGCAGUGCCCUGGGUGAGGUAGCCAGUGAGGCCAUCGAAGAUGUUGGAGACGGGCUGGAUGAUGGGUCCAAGAGGGGUGCCCGAAAGGGUGUUGAGGAUGUUGGAGAGGAUGUCGACGAGACCGGGAACGAUGUCGCCGAUGAGCUGUGUGACGAGG
........((((....))))......(((((((((...((((.(((((.((.......(((..((((...((.((((.((..((.(.((((((.((...(((....))).))...)))))).).))....)).))))))..))))..))).))))))).)))).(....)...))))))))).....((((((((......)).))))))... (-70.50)
...................................................................................................................................................................................................ATGAGCTGTGTGACGAGG	fox_18nt_0011773_0000002 + 196

>supercont2.12+_candidate_14_start_98717_stop_98940_length_224nt_hairpin_1_216_216nt_mappedmax_1 map_smallRNA_1
UGAUGGGUAUCUGAAGAAGAUCAAGUCGUUGAGCAGGGAGAACUUGGGUCCUUGUGAGAAGUUUGGAAUUGUCGGUAGGUAAACAUGUCACUGAGAUUGUUGGAAGAGUGCUAACGAAAGGUAGCAUACGAUGACGCAGCAGCUAUUUGUCUCGAGCACUUUCACAUUCUCGACAACAACCCCGAAUUCAAGCUCGGCCUUCUCAUUGCCUACUAC
...((((((..(((.((((..(..........(((((((.........)))))))....((((((((....((((..(((.....((((...((((.(((.(((((.((((((.(....).)))))).(((.(((((....)).....))))))....)))))))).))))))))...))))))).)))))))).)..))))))).)))))).... (-62.50)
......................................................................................................................................................................................................CTTCTCATTGCCTACTAC	fox_18nt_0040509_0000001 + 199

>supercont2.12+_candidate_21_start_151059_stop_151277_length_219nt_hairpin_100_211_112nt_mappedmax_2 map_smallRNA_2
UAUGGACUUGGAGGAACGGUUAGCCCUCUUAUUGCGACUAGCAUGAUCACUCAGGCCAAUCUGGGCUGGUAUGACUUUUACUACGUGCUUGUAAGUUCUCUUUACAUCCAUU
.(((((..(((((((((.....((.........)).((.((((((......(((.((.....)).)))(((.......)))..)))))).))..)))).)))))..))))). (-27.90)
TATGGACTTGGAGGAACGGT............................................................................................	fox_20nt_0049748_0000001 + 1
..TGGACTTGGAGGAACGGT............................................................................................	fox_18nt_0015650_0000002 + 3

>supercont2.12+_candidate_24_start_203928_stop_204216_length_289nt_hairpin_99_181_83nt_mappedmax_2 map_smallRNA_2
CGGGCGAAUGGUUUAGUGGUAUAAUACUCCCUUAGCAUAAUUCAUUGGAAUAAUCUGGGAGUGGUCCAGGGUUCGAUUCCCUG
((((.((((.(..(..(((.....(((((((..((.((.((((....)))).)))))))))))..)))..)..).)))))))) (-24.80)
.GGGCGAATGGTTTAGTGG................................................................	fox_18nt_0002210_0000016 + 2
.................................................................CCAGGGTTCGATTCCCTG	fox_18nt_0042598_0000001 + 66

>supercont2.12+_candidate_25_start_301931_stop_302219_length_289nt_hairpin_150_223_74nt_mappedmax_24 map_smallRNA_23
AGUCAAGCCACUAACCGGCGGAUUAGUAGUUGGGUCGGUGACGACCAGCGAAUCCCCGCUGUUGUAUGUUUUCU
....((((...(((((((.(((((....(((((.(((....)))))))).))))))))..))))...))))... (-25.10)
AGTCAAGCCACTAACCGGCGG.....................................................	fox_21nt_0009678_0000006 + 1
AGTCAAGCCACTAACCGGCGGA....................................................	fox_22nt_0002334_0000028 + 1
.GTCAAGCCACTAACCGGCGG.....................................................	fox_20nt_0008177_0000006 + 2
.GTCAAGCCACTAACCGGCGGA....................................................	fox_21nt_0006143_0000010 + 2
.GTCAAGCCACTAACCGGCGGAT...................................................	fox_22nt_0030270_0000002 + 2
..TCAAGCCACTAACCGGCGGA....................................................	fox_20nt_0096800_0000001 + 3
...CAAGCCACTAACCGGCGGA....................................................	fox_19nt_0037049_0000001 + 4
...CAAGCCACTAACCGGCGGAT...................................................	fox_20nt_0021779_0000002 + 4
...CAAGCCACTAACCGGCGGATT..................................................	fox_21nt_0021141_0000002 + 4
.....AGCCACTAACCGGCGGATT..................................................	fox_19nt_0014418_0000002 + 6
......GCCACTAACCGGCGGATT..................................................	fox_18nt_0011479_0000002 + 7
......GCCACTAACCGGCGGATTAG................................................	fox_20nt_0013614_0000003 + 7
.......CCACTAACCGGCGGATTA.................................................	fox_18nt_0005567_0000005 + 8
.......CCACTAACCGGCGGATTAG................................................	fox_19nt_0076898_0000001 + 8
........CACTAACCGGCGGATTAG................................................	fox_18nt_0006812_0000004 + 9
.................................................GAATCCCCGCTGTTGTAT.......	fox_18nt_0029256_0000001 + 50
.................................................GAATCCCCGCTGTTGTATGT.....	fox_20nt_0000268_0000315 + 50
..................................................AATCCCCGCTGTTGTATG......	fox_18nt_0037109_0000001 + 51
..................................................AATCCCCGCTGTTGTATGT.....	fox_19nt_0000134_0000538 + 51
..................................................AATCCCCGCTGTTGTATGTT....	fox_20nt_0034005_0000001 + 51
...................................................ATCCCCGCTGTTGTATGT.....	fox_18nt_0000140_0000377 + 52
...................................................ATCCCCGCTGTTGTATGTT....	fox_19nt_0009669_0000004 + 52
.....................................................CCCCGCTGTTGTATGTTT...	fox_18nt_0033376_0000001 + 54

>supercont2.12+_candidate_41_start_889172_stop_889452_length_281nt_hairpin_107_252_146nt_mappedmax_4 map_smallRNA_4
UCGUAUAGGGGUCAGUACAUCAGUUUGUGGCUAUUGAAAGCACUGAAAACGCAAGUUCGAGUCUUGCUGACGGCAAACCCAUUCUUUUUGCUUUUUUUUUCACUUAAAAUGGCUUCAAAUCAAGUCUGUGCUGACUUUCUGUGUUU
...((((((((((((((((...(((((.(((((((..(((...((((((.(((((.......)))))....((((((.........))))))....)))))))))..))))))).)))))......))))))))).)))))))... (-41.00)
TCGTATAGGGGTCAGTACA...............................................................................................................................	fox_19nt_0016152_0000002 + 1
TCGTATAGGGGTCAGTAC................................................................................................................................	fox_18nt_0040946_0000001 + 1
.CGTATAGGGGTCAGTACA...............................................................................................................................	fox_18nt_0023212_0000001 + 2
....ATAGGGGTCAGTACATCA............................................................................................................................	fox_18nt_0012105_0000002 + 5

>supercont2.12+_candidate_50_start_1093473_stop_1093678_length_206nt_hairpin_2_68_67nt_mappedmax_1 map_smallRNA_1
UGGAUGGUCUUCUGAACAGUCAGCAUGAGCCUACCCCUGGUCUGACAGAGUUCAAGAAGGUCAUUCA
.(((((..(((((((((.(((((.....(((.......))))))))...)))).)))))..))))). (-26.60)
TGGATGGTCTTCTGAACA.................................................	fox_18nt_0018049_0000001 + 1

>supercont2.12+_candidate_60_start_1370265_stop_1370516_length_252nt_hairpin_43_226_184nt_mappedmax_1 map_smallRNA_1
GACAACGCCGGUGUCCAGCUCCUCGCCUUCGCCUGUGCCUCUGCCGGUGCUUCCAUCUGGGUCAUGUGGUGCACCAAGCACAACGCCCACGUCUCCUCCACAUACUCGCUUAUCUCAUCGCUCGCUGGUGUUGGUAUCGCUACUGUUGGUGCUAGCAAGGUCGAGUGGGGUUGGAACGGUGGUC
.....(((((...((((((((((((((((.((..(..((.(.((.((((((..((((.(((..((((((.((............))))))))..)))..........((..........)).....))))..))))))))....)..))..)..)))))).)))..))))))))).)))))... (-65.80)
....................................................................................................................................................................GTGGGGTTGGAACGGTGGTC	fox_20nt_0097904_0000001 + 165

>supercont2.12+_candidate_67_start_1371676_stop_1371944_length_269nt_hairpin_93_238_146nt_mappedmax_2 map_smallRNA_2
UCCAUGUGCAUCACCGGUGCCACCGUCGGUGUCGGUCUCUGCAACGGCAGCCUCAAGGCCGUCAACUGGAAGCGAGUUUUCCUCCUCGUCUUCUCCUGGAUCAUGACCAUCCCCAUCGCUGGUCUCAUCGGUGGAUGCCUCAUGGG
.(((((.((((((((((((..((((.(((((..((((........(((.(((....))).)))....(((((((((........)))).)))))..........)))).....))))).))))..))))))).)))))..))))). (-58.70)
TCCATGTGCATCACCGGTGC..............................................................................................................................	fox_20nt_0095789_0000001 + 1
TCCATGTGCATCACCGGTGCC.............................................................................................................................	fox_21nt_0105956_0000001 + 1

>supercont2.12-_candidate_22_start_418470_stop_418200_length_271nt_hairpin_0_270_271nt_mappedmax_10 map_smallRNA_10
UCCUGCAACAAGAUUUGAUGACAGGCACUAAUGCAGCCAGCUUGCAGUAUGAAGUGUAGAUAAAGCCUAAGUAUAUCUCUCAUAUCAUCCAAUAGAUCCGCCUCUAUAGCUCAGUGGUAGAGCGUUGCACUUGUAAUGCAAAGGUCCAUCGUUCAAUCCGGUGUGGAGGCAUUUCUUCAUCUUUUGCUAUUUUAAGCAAAUUACAAUUAACAUAUCAAUUCUUUUUUCUUUUUACUCAGCCCUUAUUAAUAAUAGAGCUUUAGAUGAUUUU
.(((.((((..((((.(((((..(((.((......((((.((.((.(.((((.(((.(((((..((....)).)))))..))).)))).).(((((......))))).))..))))))...(((((((....)))))))..)))))..))))).))))..)).)).))).......((((((((((((......)))))).....................................(((.((..........)).)))..)))))).... (-53.10)
.............................................................................................................................................AGGTCCATCGTTCAATCCGGT.............................................................................................................	fox_21nt_0029724_0000002 + 142
...............................................................................................................................................GTCCATCGTTCAATCCGGT.............................................................................................................	fox_19nt_0039846_0000001 + 144
................................................................................................................................................TCCATCGTTCAATCCGGTGT...........................................................................................................	fox_20nt_0085543_0000001 + 145
...................................................................................................................................................ATCGTTCAATCCGGTGTGG.........................................................................................................	fox_19nt_0022879_0000002 + 148
...................................................................................................................................................ATCGTTCAATCCGGTGTGGA........................................................................................................	fox_20nt_0036940_0000001 + 148
......................................................................................................................................................GTTCAATCCGGTGTGGAG.......................................................................................................	fox_18nt_0028467_0000001 + 151
......................................................................................................................................................GTTCAATCCGGTGTGGAGG......................................................................................................	fox_19nt_0011178_0000003 + 151
......................................................................................................................................................GTTCAATCCGGTGTGGAGGC.....................................................................................................	fox_20nt_0001674_0000040 + 151
.......................................................................................................................................................TTCAATCCGGTGTGGAGGC.....................................................................................................	fox_19nt_0023837_0000002 + 152
........................................................................................................................................................TCAATCCGGTGTGGAGGC.....................................................................................................	fox_18nt_0008016_0000003 + 153

>supercont2.12-_candidate_26_start_582285_stop_582017_length_269nt_hairpin_33_179_147nt_mappedmax_3 map_smallRNA_5
GAGCGCGUCGUUUCGCUUCAGGUUCCUGGGACACAAUUCUCGCCCCCUCUUGCAACAAAACAGCUAGGUUCCGUGGUCUAGUUGGUUAUGGCAUCUCGUUAACACCGAGAAGGUCCCCGGUUCGAUCCCGGGCGGAACCACGUUUUU
....((((.(((((((((..((((((.(((((....((((((........(((.......(((((((..(....)..)))))))......)))............)))))).))))).))...))))..))))))))).)))).... (-47.67)
..................................................................GGTTCCGTGGTCTAGTTGGTT............................................................	fox_21nt_0002639_0000028 + 67
..................................................................GGTTCCGTGGTCTAGTTGGTTA...........................................................	fox_22nt_0003412_0000018 + 67
........................................................................................................................TTCGATCCCGGGCGGAACCAC......	fox_21nt_0099573_0000001 + 121
...........................................................................................................................GATCCCGGGCGGAACCAC......	fox_18nt_0014635_0000002 + 124
...............................................................................................................................CCGGGCGGAACCACGTTTTT	fox_20nt_0071349_0000001 + 128

>supercont2.12-_candidate_30_start_681018_stop_680803_length_216nt_hairpin_1_190_190nt_mappedmax_1 map_smallRNA_1
UGUAAGUUCCCAUAACUCUACCAUUAAAUGAAGCAGUCGCUAAUUAUGAUAUAGGAUCGGUGACAAGCCUUACUAAAUGUCAACGCCGACAUGGACGGAUGCUUAGGUUCGGGAUAGCUGGCAGUGAUCUUUUGAUGUAUCUUUUUCACUUCAAGUUAUGAGAGCGACUCACCAGGGCUAUGAACUCACA
.((.(((((..(((.((((..(((...)))..(.(((((((..(((((((..(((((((.((...(((........(((((......)))))...(((((......))))).....)))..)).))))))).(((.((.........)).))).))))))).))))))))...)))).)))))))).)). (-43.40)
..........................................................................................................................................................................ACCAGGGCTATGAACTCACA	fox_20nt_0083108_0000001 + 171

>supercont2.12-_candidate_39_start_730497_stop_730279_length_219nt_hairpin_97_215_119nt_mappedmax_6 map_smallRNA_6
GUUCGGUACUACUCCCGACGGCGAGGAGCCCAACGAUCAUGAGAAGGCGACUCUUCGACGUGUAGGAGAGAACCUCCCUGCUUCAGCUUUCCUCAUCGCUGUUGUCGAGUUGACGGAAC
((((.((...((((.(((((((((.(((....(((.((..((((.(....))))).)))))(((((.(((...))))))))..........))).)))))))))..))))..)).)))) (-41.10)
.TTCGGTACTACTCCCGACGGC.................................................................................................	fox_21nt_0101796_0000001 + 2
.TTCGGTACTACTCCCGACGGCG................................................................................................	fox_22nt_0083496_0000001 + 2
..TCGGTACTACTCCCGACGG..................................................................................................	fox_19nt_0076020_0000001 + 3
..TCGGTACTACTCCCGACGGCG................................................................................................	fox_21nt_0079689_0000001 + 3
.............................................................................................CATCGCTGTTGTCGAGTTGACGGAAC	fox_26nt_0032674_0000001 + 94
...................................................................................................TGTTGTCGAGTTGACGGAA.	fox_19nt_0044658_0000001 + 100

>supercont2.12-_candidate_44_start_932068_stop_931849_length_220nt_hairpin_102_166_65nt_mappedmax_1 map_smallRNA_1
UGGGCUAUAGAUAUUCAUGUUAAUUAAUUUACCAUUCUCACUGAUGCUGUUGGUCAUGUAGCUCA
.(((((((((((...(((((((...................))))).))...))).)))))))). (-12.11)
TGGGCTATAGATATTCATGT.............................................	fox_20nt_0026364_0000002 + 1

>supercont2.13+_candidate_103_start_955681_stop_955896_length_216nt_hairpin_100_174_75nt_mappedmax_2 map_smallRNA_2
CGGUCAAAAGAACGGCGACUGGACACUCAUCUCUGCCGGUACGAGAAACACUGUCGAGUUUUUUUUUUCUUGCCG
(((.(((.((((..(.((((.((((....((((((....)).)))).....)))).)))).)..)))).)))))) (-18.10)
CGGTCAAAAGAACGGCGA.........................................................	fox_18nt_0031800_0000001 + 1
CGGTCAAAAGAACGGCGACT.......................................................	fox_20nt_0071911_0000001 + 1

>supercont2.13+_candidate_104_start_956374_stop_956590_length_217nt_hairpin_95_162_68nt_mappedmax_2 map_smallRNA_2
AUGUCUGUUGAGCACUGGAAGGCUGCUGAGAAGGAGCUCUCAAGCCUUCUCCAAGUCCUCGAGGACAA
.(((((.(((((.(((((((((((..(((((......)))))))))))))...))).)))))))))). (-29.00)
ATGTCTGTTGAGCACTGGAAGGC.............................................	fox_23nt_0027797_0000001 + 1
.TGTCTGTTGAGCACTGGAAGGC.............................................	fox_22nt_0048806_0000001 + 2

>supercont2.13+_candidate_26_start_232371_stop_232602_length_232nt_hairpin_101_185_85nt_mappedmax_1 map_smallRNA_1
CUGAGAAACGAACUCGCGAUGGCACACGAAGCGGAAACCAGAUCAACCCUGAAGACUUCCGUGGUGUAGCUGAGUUCGUUCUUGG
(..((((.(((((((((....((((.....((((((..(((.......))).....)))))).)))).)).)))))))))))..) (-31.10)
CTGAGAAACGAACTCGCG...................................................................	fox_18nt_0050036_0000001 + 1

>supercont2.13+_candidate_48_start_525813_stop_526056_length_244nt_hairpin_15_123_109nt_mappedmax_6 map_smallRNA_6
UCUUGUUUCUCUUUUUGCUAUUGGACUGCGUUUUCUCUCAGGUAUCUACACCAUAGAGGAUCUCAUUGGAUUGGUUCUGAUUGGAUUGGAUGGACAUAGGAUAGACGGA
..((((((.((((..(((((((.((.......((((((..(((......)))..))))))(((.((..((.....))..)).))))).))))).)).)))).)))))). (-23.40)
......................................................................................TGGATGGACATAGGATAGACG..	fox_21nt_0072436_0000001 + 87
......................................................................................TGGATGGACATAGGATAGACGG.	fox_22nt_0027331_0000002 + 87
........................................................................................GATGGACATAGGATAGACG..	fox_19nt_0038695_0000001 + 89
........................................................................................GATGGACATAGGATAGACGG.	fox_20nt_0044274_0000001 + 89
........................................................................................GATGGACATAGGATAGACGGA	fox_21nt_0078196_0000001 + 89
.........................................................................................ATGGACATAGGATAGACG..	fox_18nt_0025357_0000001 + 90

>supercont2.13+_candidate_49_start_539431_stop_539653_length_223nt_hairpin_4_220_217nt_mappedmax_1 map_smallRNA_0
CAGGGUUACGAGUACUUUGUUCAGGAGCCCAACUCUCGCAAGUUUGCACCUAAGGCUUAUGCCAACAACUUCCUGUACUCUGCCAGGAAGCUUAAGCACAUCAGGACGAAAUAGAUGGCUCGGACAGCCCGGCUCCACGUAAAUAUGUUAUAAAGGCUCAUUUAAGUUCAGUAACUUUCAAAUACAUGAAACCUUAGGCAAUGUCACCCGUGAACUG
..((((.((((((.((((((...((((((........(((....)))......((((....((.....(((((((........)))))))....(((.((((...........))))))).))..)))).)))))).(((....)))..))))))))))..((((((((((((.........))).))))..))))).....)).))))........ (-53.20)

>supercont2.13+_candidate_55_start_603092_stop_603407_length_316nt_hairpin_100_188_89nt_mappedmax_7 map_smallRNA_7
UCCGGUGUGGUGUAUCGGUUUAUCAUUCCGCGUUUUCAAUUACCAUGUAAUAAAACCGCGGCGAGCGGGGUUCGACUCCCCGCACCGGA
((((((((((.(..((((....((.(((((((((((..(((((...))))))))).))))).))..))...))))..).)))))))))) (-32.70)
TCCGGTGTGGTGTATCGG.......................................................................	fox_18nt_0001885_0000020 + 1
TCCGGTGTGGTGTATCGGT......................................................................	fox_19nt_0001941_0000028 + 1
.CCGGTGTGGTGTATCGGT......................................................................	fox_18nt_0000749_0000062 + 2
....................................................................GGTTCGACTCCCCGCACC...	fox_18nt_0008722_0000003 + 69
....................................................................GGTTCGACTCCCCGCACCG..	fox_19nt_0009274_0000004 + 69
.....................................................................GTTCGACTCCCCGCACCG..	fox_18nt_0014846_0000002 + 70
.......................................................................TCGACTCCCCGCACCGGA	fox_18nt_0014769_0000002 + 72

>supercont2.13+_candidate_64_start_640232_stop_640534_length_303nt_hairpin_5_170_166nt_mappedmax_2 map_smallRNA_1
GGUAGCGUAACUCAACCGGCUCGUUCUUUCAACAAACCUCGAUUCGAGGAGCCACUUGGCCAUCAAAGACGUGAUUCGUUCUUCACCUGAGCUCUAGGGCUCUAACGAAUUCGCAAGCGUCACCCUUGAUCGACGAACCAAUCCUGAGCUUCGUGUUUACGUUACU
((((((((((..((...((((((((.....)))...(.(((((.(((((.(((....))).......(((((((((((((........(((((....))))).)))))))).....)))))..)))))))))).)..........)))))...)).)))))))))) (-51.70)
..TAGCGTAACTCAACCGGC..................................................................................................................................................	fox_18nt_0053471_0000001 + 3

>supercont2.13+_candidate_66_start_641641_stop_641888_length_248nt_hairpin_46_166_121nt_mappedmax_2 map_smallRNA_2
AGCAGCUUCAGAGGCGCCGCCGCCGUUCCGAGAAGACCCUGACAGUGCAGGAGGUUAUUGACUGUCAGCAUGCUUCGGAAAAGGAACUGAGCUGGACAUUCGGUAGCCCUCUGGAUAUGCU
((((..((((((((.((..((((((((((..((((...((((((((.(((.......)))))))))))....))))......)))))......)).....)))..))))))))))..)))) (-47.10)
....................................................................................................CGGTAGCCCTCTGGATATGCT	fox_21nt_0063735_0000001 + 101
.....................................................................................................GGTAGCCCTCTGGATATGCT	fox_20nt_0033928_0000001 + 102

>supercont2.13+_candidate_82_start_778198_stop_778414_length_217nt_hairpin_99_206_108nt_mappedmax_2 map_smallRNA_2
AAGGACUGGUCAAGAAGACUAUCAGCAUCACGUACCAAGGCGUGCCUCACCACCUCGUCAGUUACUACCAUGUGGAAGACGUCAAGGCUGGUCUUUUGCCUAGUCCUG
.((((((((...(((((((...((((..(((((......)))))...........((((..((((......))))..)))).....)))))))))))..)))))))). (-36.90)
AAGGACTGGTCAAGAAGAC.........................................................................................	fox_19nt_0026243_0000001 + 1
.AGGACTGGTCAAGAAGAC.........................................................................................	fox_18nt_0040183_0000001 + 2

>supercont2.13+_candidate_93_start_876439_stop_876656_length_218nt_hairpin_101_156_56nt_mappedmax_1 map_smallRNA_1
ACUGUUUUGACUUUGGCUAUUAUGACGGCCAACGCGUAUGUCAAGGAUGAAACAGA
.((((((((.(((((((...((((.((.....)))))).))))))).)))))))). (-20.30)
.....................................ATGTCAAGGATGAAACAGA	fox_19nt_0044194_0000001 + 38

>supercont2.13-_candidate_103_start_693074_stop_692857_length_218nt_hairpin_26_120_95nt_mappedmax_4 map_smallRNA_4
CUUGUUGUUCUUUCCGCCGAAGAGACGCAUUAUGAGUGAAUAGUAGGCCGGUCCUAGUAAUCCAAAAAUGUCUUUGAAGGUAGAGCAACGACGGG
.((((((((((..((..((((((..(((.......)))..((.((((.....)))).))...........))))))..)).)))))))))).... (-25.20)
........................................................................TTTGAAGGTAGAGCAACGAC...	fox_20nt_0027302_0000002 + 73
.........................................................................TTGAAGGTAGAGCAACGA....	fox_18nt_0016657_0000001 + 74
.........................................................................TTGAAGGTAGAGCAACGAC...	fox_19nt_0010365_0000003 + 74
..........................................................................TGAAGGTAGAGCAACGACGGG	fox_21nt_0069727_0000001 + 75

>supercont2.13-_candidate_106_start_783118_stop_782902_length_217nt_hairpin_94_170_77nt_mappedmax_5 map_smallRNA_5
GCUGUGACGGAAGAGUGUAGGGUUGACGUGAUCUGGGAGCUGUUUUACGUCAUUUUGCAUGGUCUGUCUGUCGCAGA
.((((((((((((((((((((((.(((((((...(....)....))))))))))))))))..))).)))))))))). (-32.80)
GCTGTGACGGAAGAGTGTAGGGT......................................................	fox_23nt_0012620_0000003 + 1
GCTGTGACGGAAGAGTGTAGGGTTGACGT................................................	fox_29nt_0037944_0000001 + 1
...GTGACGGAAGAGTGTAGGGTTGACGT................................................	fox_26nt_0024432_0000001 + 4
.....GACGGAAGAGTGTAGGGTTGACGT................................................	fox_24nt_0024851_0000001 + 6
......ACGGAAGAGTGTAGGGTTGACGT................................................	fox_23nt_0039970_0000001 + 7

>supercont2.13-_candidate_118_start_912313_stop_912094_length_220nt_hairpin_25_129_105nt_mappedmax_1 map_smallRNA_1
AGUUGCACUCAUCCGUCGCGCUUCACGUAUCUCUGCCGCUGCUCAUCGUGCCGUGGCUGAGCGUCUCCUUACUAUGCGCAAUGAGCAAGACGUCGAGGCAGUUCU
..((((.(((...((((..((((..((((((((.(((((.((.......)).))))).)))............)))))....))))..))))..))))))).... (-32.80)
...................................................................................AGCAAGACGTCGAGGCAGTTCT	fox_22nt_0037587_0000001 + 84

>supercont2.13-_candidate_120_start_912485_stop_912258_length_228nt_hairpin_51_107_57nt_mappedmax_1 map_smallRNA_1
CAACUUCGUCCUGAGAAGACUCUCUAUGUCCUUCAUUCUGAUCAGGCUCCUAAGUUG
((((((.(.(((((..(((......(((.....))))))..)))))...).)))))) (-12.00)
....................................TCTGATCAGGCTCCTAAGTTG	fox_21nt_0024941_0000002 + 37

>supercont2.13-_candidate_146_start_1346962_stop_1346739_length_224nt_hairpin_26_151_126nt_mappedmax_1 map_smallRNA_1
CCAUGUGGAAGAUGAUCAUCGGUCAAUCGAUCUACCAGCUCAUCGUAUGUUUCGUCCUCUGGUUCGGUCGCGAUUCAAUCCUCGGCUAUGAAGAACGCGAAGUCCGAUCCCUCAUCUUCAACAUCU
..((((.((((((((..(((((.(...(((...(((((.....((.......))....)))))))).(((((.((((..(....)...))))...))))).).)))))...)))))))).)))).. (-36.70)
CCATGTGGAAGATGATCATCGG........................................................................................................	fox_22nt_0074869_0000001 + 1

>supercont2.13-_candidate_14_start_59821_stop_59556_length_266nt_hairpin_14_233_220nt_mappedmax_1 map_smallRNA_1
UGCUGCAAUGUGUAUAUGUGAUUUUAAACUAAAAACCACCUUAGCUCGCUAAACUGACGUCGGACCUUGCAUCAAUGGAACCUUCUGGAGGUGGAUGGAUGCGAAUUUAGAAAACAUGAAAAUCAUGUCAUUAGUCGUAGAACAUAUAUAGCCUGUUAGUUAUUAUACAAACCAACCGUUUGAAUUUCCCGUGGUUCGUCGCGGAAUGCCUCUUGUAUCA
.(.(((((...((((.((((((...........((((((.(((((..((((........((.(((.(((((((......(((((...))))).....))))))).........(((((.....))))).....)))...)).......))))..)))))........(((((.....)))))........)))))).))))))..))))...))))).). (-45.06)
.........................................................................................................................................................................................................CGGAATGCCTCTTGTATCA	fox_19nt_0081515_0000001 + 202

>supercont2.13-_candidate_154_start_1426668_stop_1426385_length_284nt_hairpin_80_144_65nt_mappedmax_2 map_smallRNA_2
GGCAAUCCUCCGCGAGUUCUGGACAAAGCUGGACAAUGACCAAAUGCAGUUUUGCGGUCGAUGCC
((((.((..(((((((..(((.(......(((.......)))..).))).)))))))..)))))) (-19.10)
...AATCCTCCGCGAGTTCTGG...........................................	fox_19nt_0036464_0000001 + 4
....................GGACAAAGCTGGACAATGA..........................	fox_19nt_0039971_0000001 + 21

>supercont2.13-_candidate_155_start_1426827_stop_1426610_length_218nt_hairpin_49_206_158nt_mappedmax_3 map_smallRNA_2
GUCGCCGUGGUCCUGCCCCUGGUACAGGAGGGCGGCCAAGAAAAUCUCGAAGGCAAACUCGAUCGUCGAUGCCGCCACGGCGUAUUCGGAGUCCAGUGAUAAUUCCACCUGAAGAAUCGGCGGUCUUUCAUGCGCAAGAUCCGGUGUGGAAUGGCGAC
((((((((..(((((((((((...))))..((((((...((.....((((.(.....)))))...))...))))))...((((((..((((.((..((((..(((.....)))..))))..)).)))).)))))).......)))).))))))))))) (-54.90)
...........................................................................................................................................TCCGGTGTGGAATGGCGA.	fox_18nt_0006543_0000004 + 140
...........................................................................................................................................TCCGGTGTGGAATGGCGAC	fox_19nt_0003400_0000014 + 140

>supercont2.13-_candidate_19_start_83151_stop_82925_length_227nt_hairpin_100_180_81nt_mappedmax_1 map_smallRNA_1
GAGAAGAUCUUGGACUGGCUUAACCAGGGCAAGGAUGUCCGCAAGGGUACCUGGGGCCCCAAGGAGGUAAGACUUUUUCUC
(((((((..((..(((..(((.....((((.(((.(..((....))..))))...)))).)))..)))..))..))))))) (-28.50)
GAGAAGATCTTGGACTGGC..............................................................	fox_19nt_0041967_0000001 + 1

>supercont2.13-_candidate_33_start_242462_stop_242239_length_224nt_hairpin_57_117_61nt_mappedmax_1 map_smallRNA_1
AAGUCCUGCGUAUUCAAGGGAGAUUUCUAGAAAAGGGAUAAUCUUUUCGGAUCGAGGACGC
..(((((.((.((((((((((.((..((.....))..))..)))))).))))))))))).. (-18.60)
..........................................CTTTTCGGATCGAGGACGC	fox_19nt_0079900_0000001 + 43

>supercont2.13-_candidate_45_start_319053_stop_318712_length_342nt_hairpin_117_230_114nt_mappedmax_1 map_smallRNA_1
GACGGUUUCCUUAAGCGAAGGCAGGCAGUGAGGGAUUUUACCAAGUCCCUAUUGGAACAGAACCAGGCCAACACCAAGGCCUGGAUCAACGAGGCUUUCGAAAAGUAUAACCGC
..(((((..(((...(((((((...((((.((((((((....)))))))))))).....((.(((((((........))))))).))......)))))))..)))...))))). (-45.60)
...............................................................................................TTTCGAAAAGTATAACCGC	fox_19nt_0060488_0000001 + 96

>supercont2.13-_candidate_53_start_464494_stop_464270_length_225nt_hairpin_53_120_68nt_mappedmax_1 map_smallRNA_1
UCUUCUUGAGGCCUUAAGCAUCUAAACAAGCAACUCCUUGCCUUGUAAUUGUUGAACGCUGAAAGGAA
..(((((..(((.((.((((.....((((((((....))).)))))...)))).)).)))..))))). (-14.80)
.................................................TGTTGAACGCTGAAAGGAA	fox_19nt_0078442_0000001 + 50

>supercont2.13-_candidate_60_start_503824_stop_503611_length_214nt_hairpin_30_173_144nt_mappedmax_2 map_smallRNA_2
UACACUCUUUUUGCCGGCUUGGAAGCGCUCAUAAAGCGUCUUCUUGUCCUUGGCUUCUUCGGAGGGAUUUGACGAGGAAGACGAAGAGUUGCCCAUGAUGGUGUUUUUGAUAAAGAGGCUUCUAAAUUGGCUUGAGAUUAUGUU
.....((((...(((((.((((((((.(((......((((((((((((.....((((....)))).....))).))))))))).((((..(((......)))..))))......))))))))))).)))))..))))....... (-48.50)
..............CGGCTTGGAAGCGCTCATA...............................................................................................................	fox_19nt_0061464_0000001 + 15
..............................................................................................................................TTGGCTTGAGATTATGTT	fox_18nt_0049888_0000001 + 127

>supercont2.13-_candidate_62_start_504490_stop_504068_length_423nt_hairpin_220_321_102nt_mappedmax_12 map_smallRNA_12
UCGUCUCUCAUUCGAGGCAUGGAACCUUGUCAUUCAUUUAGUCUGAGCGACUCAAGUUUGGAAAACAUGAACCCAAGGUCGGAUGUCACUCGAAAGAGACGC
.(((((((..((((((((((...((((((...(((((....((..(((.......)))..))....)))))..))))))...))))..))))))))))))). (-36.30)
..........................................................................AAGGTCGGATGTCACTCGA.........	fox_19nt_0052192_0000001 + 75
..........................................................................AAGGTCGGATGTCACTCGAAAGAGAC..	fox_26nt_0049557_0000001 + 75
...........................................................................AGGTCGGATGTCACTCGAAAGA.....	fox_22nt_0045875_0000001 + 76
...........................................................................AGGTCGGATGTCACTCGAAAGAGAC..	fox_25nt_0051677_0000001 + 76
...........................................................................AGGTCGGATGTCACTCGAAAGAGACGC	fox_27nt_0012220_0000002 + 76
............................................................................GGTCGGATGTCACTCGAAAGAGACGC	fox_26nt_0014257_0000002 + 77
..............................................................................TCGGATGTCACTCGAAAGAGA...	fox_21nt_0088696_0000001 + 79
..............................................................................TCGGATGTCACTCGAAAGAGAC..	fox_22nt_0049817_0000001 + 79
..............................................................................TCGGATGTCACTCGAAAGAGACG.	fox_23nt_0019215_0000002 + 79
...............................................................................CGGATGTCACTCGAAAGAGACG.	fox_22nt_0010266_0000004 + 80
...............................................................................CGGATGTCACTCGAAAGAGACGC	fox_23nt_0009309_0000004 + 80
..................................................................................ATGTCACTCGAAAGAGACG.	fox_19nt_0055285_0000001 + 83

>supercont2.13-_candidate_66_start_505576_stop_505259_length_318nt_hairpin_62_128_67nt_mappedmax_7 map_smallRNA_7
UGCCCAUUUUUCUCUCGUCAGCAUGGUCAGUUCAAACUGGUCGUGUUGAUGAUAGGGGGAUGUGGCU
.((((((((..((.(((((((((((..((((....))))..))))))))))).))..))))).))). (-39.20)
.GCCCATTTTTCTCTCGTC................................................	fox_18nt_0029680_0000001 + 2
.GCCCATTTTTCTCTCGTCAGCATGGTCA......................................	fox_28nt_0023537_0000001 + 2
.........................................CGTGTTGATGATAGGGGGATGTGGC.	fox_25nt_0030563_0000001 + 42
...........................................TGTTGATGATAGGGGGATGTGGC.	fox_23nt_0012293_0000003 + 44
...........................................TGTTGATGATAGGGGGATGTGGCT	fox_24nt_0018433_0000002 + 44
............................................GTTGATGATAGGGGGATGT....	fox_19nt_0054612_0000001 + 45
............................................GTTGATGATAGGGGGATGTGGC.	fox_22nt_0085130_0000001 + 45

>supercont2.13-_candidate_6_start_7218_stop_7013_length_206nt_hairpin_25_110_86nt_mappedmax_1 map_smallRNA_1
GCCACCGCCCUUCCUCCUGGUCUGCCGCAUGGUCUAACAAAAGUCAGUUUACAACAAGUGGCACGAGACCGAGCUGGAGCGCUGGC
((((.(((((...(((..((((((((((.((....(((........))).....)).)))))...))))))))..)).))).)))) (-31.50)
....................................................................CCGAGCTGGAGCGCTGGC	fox_18nt_0051070_0000001 + 69

>supercont2.13-_candidate_76_start_615572_stop_615156_length_417nt_hairpin_195_253_59nt_mappedmax_1 map_smallRNA_1
UCUUUAUUCUCUUUGUUUUUGAUACCACACUGGAAGCAAUGACGAUUGGUGGAUAAAGC
.((((((((.(((((((.(((...((.....))...))).)))))..)).)))))))). (-14.30)
.......................................TGACGATTGGTGGATAAAGC	fox_20nt_0038266_0000001 + 40

>supercont2.13-_candidate_84_start_617076_stop_616775_length_302nt_hairpin_16_75_60nt_mappedmax_1 map_smallRNA_1
GAUACUGCCAAGGACGCACGUGGUGGCCUUGCUGCCGCCGAGCGUGACCUCCGCACUAUC
((((.(((..(((...(((((((((((......))))))..))))).)))..))).)))) (-25.80)
GATACTGCCAAGGACGCAC.........................................	fox_19nt_0014890_0000002 + 1

>supercont2.13-_candidate_85_start_617312_stop_616934_length_379nt_hairpin_129_359_231nt_mappedmax_8 map_smallRNA_8
CGUCUCAAGAAGAUGAUUCUGGAGUGCCAGCAGCACGAGGACUACUCUCAGGCCAUUCAGACUCUUCUGCGCCUGGCUGAGACUUACAGCCGCCACGGCCGCACUCUUGGCCAAGGCUCUACCGAUACUGCCAAGGACGCACGUGGUGGCCUUGCUGCCGCCGAGCGUGACCUCCGCACUAUCAUUGAGCGAUUCGCCAACGGCACCUCCACUGAGGAUCUUUGGGAGGCC
.(((((..((((((..((((((((((((.((.((.((.((.........((((....((((....)))).))))(((((.......))))).)).)))).))....(((((.((.((((....((((.(((..(((...(((((((((((......))))))..))))).)))..))).))))...))))..)).))))).)))).)))))..))).))))))..))))). (-92.40)
...CTCAAGAAGATGATTCTGG.................................................................................................................................................................................................................	fox_19nt_0065467_0000001 + 4
...........................................................................................................................GATACTGCCAAGGACGCAC.........................................................................................	fox_19nt_0014890_0000002 + 124
..............................................................................................................................................................................................................CTCCACTGAGGATCTTTGGGA....	fox_21nt_0091477_0000001 + 207
..............................................................................................................................................................................................................CTCCACTGAGGATCTTTGGGAGGC.	fox_24nt_0007078_0000004 + 207
...............................................................................................................................................................................................................TCCACTGAGGATCTTTGGGAGGC.	fox_23nt_0014923_0000002 + 208
................................................................................................................................................................................................................CCACTGAGGATCTTTGGGAGGC.	fox_22nt_0027319_0000002 + 209
..................................................................................................................................................................................................................ACTGAGGATCTTTGGGAGGC.	fox_20nt_0055500_0000001 + 211
...................................................................................................................................................................................................................CTGAGGATCTTTGGGAGGCC	fox_20nt_0051723_0000001 + 212

>supercont2.14+_candidate_109_start_1595176_stop_1595486_length_311nt_hairpin_109_191_83nt_mappedmax_2 map_smallRNA_2
GCCGAGUGGUCUAAGGCGCUGCACUCAAGAUACGGUCUUACCCAGUUAACUGGGGCGUUUUGCAGUAUCGAAAGAUUCUUGGG
.(((((.(((((..(..((((((...(((((...))))).(((((....)))))......))))))..)...)))))))))). (-29.70)
...........................................................TTGCAGTATCGAAAGATTC.....	fox_19nt_0036793_0000001 + 60
..............................................................CAGTATCGAAAGATTCTTGGG	fox_21nt_0040554_0000001 + 63

>supercont2.14+_candidate_110_start_1595373_stop_1595683_length_311nt_hairpin_109_191_83nt_mappedmax_2 map_smallRNA_2
GCCGAGUGGUCUAAGGCGCUGCACUCAAGACUAGGUCUUCCCUAGUUAACUAGGGCGUUUUGCAGUAUCGAAAGAUUCUUGGG
.(((((.(((((..(..((((((...(((((...)))))((((((....)))))).....))))))..)...)))))))))). (-30.70)
...........................................................TTGCAGTATCGAAAGATTC.....	fox_19nt_0036793_0000001 + 60
..............................................................CAGTATCGAAAGATTCTTGGG	fox_21nt_0040554_0000001 + 63

>supercont2.14+_candidate_20_start_689742_stop_689966_length_225nt_hairpin_17_193_177nt_mappedmax_1 map_smallRNA_1
UCGUCCGCUGUUGUGCCUCUUACCUUUCUCGAGCGUGCUCGCUCUGUGGUUAAGAAGGCUGUUGGCAAGGUAAUGCACCCCCUGGUGGAACGAAGUGAUAGCAAAACGCGACAUCGGGCCAACAGUAGUGCUGCUAGCUCCACCGGCGACAACGUAAGCAUGUACAAUAACGGGCCU
..(((((.((((((((..(((((.......(((((....))))).((.((...(..((..(((((((.......((((...(((.(((..(((.((....((.....)).)).)))..))).)))..))))))))))).))..).)).))...)))))...)))))))).))))).. (-59.71)
TCGTCCGCTGTTGTGCCT...............................................................................................................................................................	fox_18nt_0031495_0000001 + 1

>supercont2.14+_candidate_32_start_762674_stop_762899_length_226nt_hairpin_106_204_99nt_mappedmax_2 map_smallRNA_2
UGGACGGAUGUAGCUGAAUACAUUUCAUCUAUUCGUUGUAUCUUAUAACUCCUGUCGAUGUGUGCGUGAGGGGAAUUUGUAUCCAGCUGGAUCUGUCCU
.((((((((.((((((.(((((............((((((...))))))((((.((.(((....))))).))))...))))).)))))).)))))))). (-38.00)
TGGACGGATGTAGCTGAATAC..............................................................................	fox_21nt_0021136_0000002 + 1
..GACGGATGTAGCTGAATACATT...........................................................................	fox_22nt_0033247_0000001 + 3

>supercont2.14+_candidate_33_start_775285_stop_775554_length_270nt_hairpin_188_251_64nt_mappedmax_1 map_smallRNA_1
ACUCGUGAUAUCAAUUUUUGGUGUUUUGGCCUCUUUUUGCUUGCCAUGUGUUGUGUCGUUGAGG
.(((((((((.((((...((((.....(((........))).))))...))))))))).)))). (-13.50)
ACTCGTGATATCAATTTTT.............................................	fox_19nt_0049618_0000001 + 1

>supercont2.14+_candidate_39_start_825599_stop_825880_length_282nt_hairpin_81_152_72nt_mappedmax_1 map_smallRNA_1
UGGUUCUUAGGGUUUUCUGUAUAGUAGAACAAAAAGGUAUGAUGGAAGGGGAACGGAGCAACCUUGGAAUCA
.((((((.((((((((((((................................)))))).)))))))))))). (-15.25)
TGGTTCTTAGGGTTTTCTGTA...................................................	fox_21nt_0083173_0000001 + 1

>supercont2.14+_candidate_44_start_890690_stop_890913_length_224nt_hairpin_68_127_60nt_mappedmax_1 map_smallRNA_1
ACUACCACCACUGCUGCUAUCGUCUCUACCACCGAGACUGCUAGCACCGAGGCUGGUACU
..(((((((.(.(.(((((.((((((.......))))).).)))))).).)).))))).. (-19.30)
..................................AGACTGCTAGCACCGAGGCTGGTACT	fox_26nt_0032246_0000001 + 35

>supercont2.14+_candidate_48_start_907208_stop_907488_length_281nt_hairpin_135_192_58nt_mappedmax_4 map_smallRNA_34
GAAAUCUAUUCUCCUCGGAGGCGUCUGUUCGAAUCAGGCCUGCGUCGAUUGGUAUUUU
((((((((...((..((.((((..(((.......))))))).))..)).))).))))) (-13.70)
GAAATCTATTCTCCTCGGAGG.....................................	fox_21nt_0088559_0000001 + 1
.AAATCTATTCTCCTCGGA.......................................	fox_18nt_0051252_0000001 + 2
.AAATCTATTCTCCTCGGAG......................................	fox_19nt_0040291_0000001 + 2
.AAATCTATTCTCCTCGGAGGC....................................	fox_21nt_0026104_0000002 + 2
..............TCGGAGGCGTCTGTTCGA..........................	fox_18nt_0010924_0000002 + 15
..............TCGGAGGCGTCTGTTCGAAT........................	fox_20nt_0013755_0000003 + 15
...............CGGAGGCGTCTGTTCGAA.........................	fox_18nt_0007558_0000003 + 16
...............CGGAGGCGTCTGTTCGAAT........................	fox_19nt_0046930_0000001 + 16
................GGAGGCGTCTGTTCGAATC.......................	fox_19nt_0010974_0000003 + 17
................GGAGGCGTCTGTTCGAATCAG.....................	fox_21nt_0019091_0000003 + 17
................GGAGGCGTCTGTTCGAATCAGG....................	fox_22nt_0088822_0000001 + 17
................GGAGGCGTCTGTTCGAATCAGGC...................	fox_23nt_0001772_0000033 + 17
.................GAGGCGTCTGTTCGAATCA......................	fox_19nt_0009170_0000004 + 18
.................GAGGCGTCTGTTCGAATC.......................	fox_18nt_0038341_0000001 + 18
.................GAGGCGTCTGTTCGAATCAGG....................	fox_21nt_0033740_0000002 + 18
.................GAGGCGTCTGTTCGAATCAGGC...................	fox_22nt_0001203_0000060 + 18
.................GAGGCGTCTGTTCGAATCAGGCC..................	fox_23nt_0016418_0000002 + 18
..................AGGCGTCTGTTCGAATCA......................	fox_18nt_0010494_0000002 + 19
..................AGGCGTCTGTTCGAATCAG.....................	fox_19nt_0019030_0000002 + 19
..................AGGCGTCTGTTCGAATCAGG....................	fox_20nt_0008518_0000006 + 19
..................AGGCGTCTGTTCGAATCAGGC...................	fox_21nt_0000621_0000137 + 19
..................AGGCGTCTGTTCGAATCAGGCC..................	fox_22nt_0012563_0000004 + 19
...................GGCGTCTGTTCGAATCAGGC...................	fox_20nt_0006480_0000008 + 20
....................GCGTCTGTTCGAATCAGGC...................	fox_19nt_0004437_0000010 + 21
....................GCGTCTGTTCGAATCAGGCC..................	fox_20nt_0085688_0000001 + 21
.....................CGTCTGTTCGAATCAGGC...................	fox_18nt_0002494_0000014 + 22
.....................CGTCTGTTCGAATCAGGCC..................	fox_19nt_0055074_0000001 + 22
......................GTCTGTTCGAATCAGGCC..................	fox_18nt_0016369_0000001 + 23
..........................GTTCGAATCAGGCCTGCGTC............	fox_20nt_0024654_0000002 + 27
..........................GTTCGAATCAGGCCTGCGTCG...........	fox_21nt_0025087_0000002 + 27
...........................TTCGAATCAGGCCTGCGTC............	fox_19nt_0065674_0000001 + 28
...........................TTCGAATCAGGCCTGCGTCG...........	fox_20nt_0104065_0000001 + 28
............................TCGAATCAGGCCTGCGTCG...........	fox_19nt_0018419_0000002 + 29
.............................CGAATCAGGCCTGCGTCG...........	fox_18nt_0025033_0000001 + 30

>supercont2.14+_candidate_53_start_1063867_stop_1064068_length_202nt_hairpin_19_107_89nt_mappedmax_1 map_smallRNA_1
CCUACGCAAGGGAUUCUUCGAGACACAGGAAAAGGUCAACGGAUGGAUUACAAACAUCAAGAAGAAGAUCGAGGAGAACUUUGAUGAGA
.((...(((((..(((((((((((.(.......))))....((((.........))))..........))))))))..)))))...)). (-21.40)
......................................................................GAGGAGAACTTTGATGAGA	fox_19nt_0072157_0000001 + 71

>supercont2.14+_candidate_62_start_1140569_stop_1140863_length_295nt_hairpin_5_127_123nt_mappedmax_1 map_smallRNA_1
AAGGGACUCAGCUUCCCUCUCCCCCACCGCAUCACCAAGGAGAACACCAAGAAGAUCUUCAGCGCGAAGCGACCUUCCACUUUCGCUUAGAAUGAUUUCGGUUUAGAGGACGGUUGGGCUCUG
.((((.(((((((..(((((.....((((.((((....(((((.(........).))))).(((.((((.(......).)))))))......))))..))))..)))))..))))))))))). (-35.40)
.........................................................................................................GAGGACGGTTGGGCTCTG	fox_18nt_0022177_0000001 + 106

>supercont2.14-_candidate_106_start_1266892_stop_1266673_length_220nt_hairpin_136_201_66nt_mappedmax_1 map_smallRNA_1
AGGCAGUUGUAGGCAGUUGUUGCGUAGUAUUUGCUCCGGUUACGCACGACUAUCGCGCUACUGUCU
(((((((.((.(..((((((.((((((............))))))))))))..)..)).))))))) (-23.70)
................................................ACTATCGCGCTACTGTCT	fox_18nt_0049424_0000001 + 49

>supercont2.14-_candidate_110_start_1310145_stop_1309927_length_219nt_hairpin_68_122_55nt_mappedmax_1 map_smallRNA_1
UAACCUAUGUCUUCUGCAAUGGUUACAUUCUACUAGAGUAGGAGGCAUGGAAAUA
....(((((((((((((..((((........))))..)))))))))))))..... (-21.90)
TAACCTATGTCTTCTGCA.....................................	fox_18nt_0051291_0000001 + 1

>supercont2.14-_candidate_120_start_1325680_stop_1325423_length_258nt_hairpin_92_241_150nt_mappedmax_3 map_smallRNA_2
AUCGUCGUUUGAUCGCGAACGGUACGACUAUGCUGCACCAGAACUGUGGUCUCGGCCUGCAGGGGCGACGAGCCCGACCGGCAGAUUCCCAUCUGAUGAACAUUUCGGAAUGGUGCAAACAUACGAUCCGAGCGGCUCACCAACGGCGAU
((((((((((((((((...(((..((..((((.(((((((...(((((((....))).))))((((.....))))..(((((((((....))))).........))))..)))))))..))))))..))).)))).)))..))))))))) (-55.10)
......GTTTGATCGCGAACGGTACG............................................................................................................................	fox_20nt_0065547_0000001 + 7
.......TTTGATCGCGAACGGTAC.............................................................................................................................	fox_18nt_0006347_0000004 + 8

>supercont2.14-_candidate_134_start_1383271_stop_1383050_length_222nt_hairpin_98_168_71nt_mappedmax_7 map_smallRNA_7
UUGUCCAAGCGUUGGGACUACGGUGCGCUCAACCUGCACUUUACGCAGUAUGGUCGUGUCAAUGCUGGCAA
.((.(((.(((((((.((.((.((((((................)).)))).)).)).)))))))))))). (-22.59)
TTGTCCAAGCGTTGGGACTACGG................................................	fox_23nt_0045836_0000001 + 1
TTGTCCAAGCGTTGGGACTACGGT...............................................	fox_24nt_0050353_0000001 + 1
.TGTCCAAGCGTTGGGACTACGGT...............................................	fox_23nt_0007016_0000005 + 2
...TCCAAGCGTTGGGACTACGGT...............................................	fox_21nt_0064834_0000001 + 4
...TCCAAGCGTTGGGACTACGGTGCG............................................	fox_24nt_0020807_0000001 + 4
....CCAAGCGTTGGGACTACGGT...............................................	fox_20nt_0013577_0000003 + 5
......AAGCGTTGGGACTACGGT...............................................	fox_18nt_0036394_0000001 + 7

>supercont2.14-_candidate_135_start_1383381_stop_1383163_length_219nt_hairpin_50_163_114nt_mappedmax_1 map_smallRNA_1
UCAUGCUCGCAGGCUGGGUGAACCUCCUCUGGAUGCUGUACCCCAUCGCCUAUGGUAUCUCUGACGGCGGUAACGUGGUUGGUGUCACUGGAAGCUUCAUCUUCUUCGGUAUCC
..((((.((.(((..((((((((.(((....(((((((.((((.((((((...((.....))...))))))...).))))))))))...))).).))))))).))))))))).. (-32.30)
...............................................................................................TTCATCTTCTTCGGTATCC	fox_19nt_0038206_0000001 + 96

>supercont2.14-_candidate_140_start_1441780_stop_1441362_length_419nt_hairpin_202_262_61nt_mappedmax_3 map_smallRNA_3
CCUUCGGUGUCUUCUGUGUCAUGGGUGGUCUCUACUACUUCAUGCAGGGCAGCACUGGAUU
..(((((((.((.((.((.((((((((((....))))).))))))).)).))))))))).. (-22.60)
CCTTCGGTGTCTTCTGTGTCATGGGT...................................	fox_26nt_0013474_0000002 + 1
..TTCGGTGTCTTCTGTGTCAT.......................................	fox_20nt_0073811_0000001 + 3
...TCGGTGTCTTCTGTGTCATGGGTGG.................................	fox_25nt_0044405_0000001 + 4

>supercont2.14-_candidate_153_start_1499454_stop_1499227_length_228nt_hairpin_98_209_112nt_mappedmax_4 map_smallRNA_4
UGCAUUGACUGUAGGAGGCGACGAGUCGCUGUAAGUCAUACUCAUUCUAUGUGCCACACAAACUUUUUAUAUGGACUUAUAUGCCAACCCUUGUCUCCAUUAUUGUAGUGCC
.((((((...(((((((((((.(.((.((((((((((............((((...)))).............)))))))).))..))).))))))))..)))..)))))). (-29.01)
TGCATTGACTGTAGGAGGCGAC..........................................................................................	fox_22nt_0084977_0000001 + 1
..CATTGACTGTAGGAGGCGACGA........................................................................................	fox_22nt_0033349_0000001 + 3
....TTGACTGTAGGAGGCGACGA........................................................................................	fox_20nt_0033840_0000002 + 5
.....TGACTGTAGGAGGCGACGAGT......................................................................................	fox_21nt_0094383_0000001 + 6

>supercont2.14-_candidate_159_start_1562522_stop_1562302_length_221nt_hairpin_34_121_88nt_mappedmax_2 map_smallRNA_2
GAUCUUGUAAUAUAAUGUCAUACGAAAACGACUCCUUGGUAGAGGCUUGGAAGUCAAUGAUACACAAAUGAAUUGUAGAAGCUGGAUA
.((((.((..((((((.((((........((((((..(((....))).)).))))..((.....)).))))))))))...)).)))). (-15.40)
....................................................................TGAATTGTAGAAGCTGGAT.	fox_19nt_0065028_0000001 + 69
....................................................................TGAATTGTAGAAGCTGGATA	fox_20nt_0103931_0000001 + 69

>supercont2.14-_candidate_19_start_582846_stop_582579_length_268nt_hairpin_10_241_232nt_mappedmax_1 map_smallRNA_1
AUGUUAUUGAUCGUGAGGAGGAGGAGUUCUUGGCUGCUCAGGCCGCUAAGCGUGAGGCCGAGGGUCCCAACCGUGGAGGAUGGUUCUACAAGACCUUCGUCUCUUGGUUGUUCUAGAUGCGUCCUUUAUCGGAUGUUUACAGUGUAUAUGAAGAUGCCCGUUCGCGGGUAAUGAGCGUAUGUAGUCAAGAUGAAUACUAUCUUCCACAUUAAACAAUUCAUGAACCAUGUUU
..........(((((((..(..((..((((((((..((((.((......)).))))))))))))..))....((((((((((((((..(((((........))))).(((..(((.((((((.((((((....((....))......)))))).((((((....))))))....)))))).))).)))...))..))))))))))))......)..)))))))......... (-75.40)
ATGTTATTGATCGTGAGG......................................................................................................................................................................................................................	fox_18nt_0028147_0000001 + 1

>supercont2.14-_candidate_25_start_584462_stop_584246_length_217nt_hairpin_37_115_79nt_mappedmax_1 map_smallRNA_1
GCUGCACCGUGGUCUCAAGGCCCGUCACAUCACCAUGAUUGCUAUCGGUGGUGCGAUCGGUACUGGUCUUAUUGUCGGC
((((.((.((((..(((..(((.(((.(((((((..(((....)))))))))).))).)))..)))..)))).)))))) (-26.70)
.............................................................ACTGGTCTTATTGTCGGC	fox_18nt_0026945_0000001 + 62

>supercont2.14-_candidate_27_start_595973_stop_595562_length_412nt_hairpin_36_353_318nt_mappedmax_2 map_smallRNA_2
UGAGCCAACCUCCUUCACAUUGCAACAACACUCAACUGACACUCACAGGAUCUUACAACUACAAGAAAUACAGCUCUUACGGCACUUACAAGCGUGCCAAGGAGUUCAUCAACUCUCUCUUCUAAGCUCAAAACUGAAAUUGACAUGGUGAUGAAAGGGGUGUUGGAACUGGGACAGUACACGAUGGCACAACGCGCAUAACUGUUCUUAUGAACGACUUACGAUUCUCAACGAGAGAAAUGUUUAAUGUUUUAUGUUUGGAAUGAGUUUGGACUUGAAUUAAUGGAGUGUUUUGGUAUUGGAGGUGGUGCGGGUUUA
((((((.(((.((((((...(((...(((((((..(((.......))).............((((......(((((((..(((((........))))).)))))))..............((((((((((...(..((...(((((...............((((.....((((((((.....(((((.....)).))).))))))))......))))..(((.(((((.....))))).)))...))))).....))..)..))))))))))))))........)))))))...))).)))))).)))...)))))) (-86.60)
..........................................................................................................................................................................................................................................................................................................TTGGAGGTGGTGCGGGTTTA	fox_20nt_0059322_0000001 + 299
...........................................................................................................................................................................................................................................................................................................TGGAGGTGGTGCGGGTTTA	fox_19nt_0015869_0000002 + 300

>supercont2.14-_candidate_53_start_651983_stop_651727_length_257nt_hairpin_138_216_79nt_mappedmax_3 map_smallRNA_3
AGAAGUCUGUGACUGAGGCAAUGGCUGGCCUGGAGCAUAAUGCUCGUAGCCGCAAGUCUAGCUACAGUCUACGAUUCUU
((((...((((((((.(((...(((((((...((((.....))))...)))...))))..))).))))).))).)))). (-26.70)
AGAAGTCTGTGACTGAGG.............................................................	fox_18nt_0049167_0000001 + 1
AGAAGTCTGTGACTGAGGC............................................................	fox_19nt_0022120_0000002 + 1
.GAAGTCTGTGACTGAGGC............................................................	fox_18nt_0021373_0000001 + 2

>supercont2.14-_candidate_56_start_769411_stop_769142_length_270nt_hairpin_32_128_97nt_mappedmax_29 map_smallRNA_29
GAUGUAUAGGAUCCCAUACGCGACGGUUUUCCCACAGCCCUCACUACAACAGGUGAUAACCUGCUAUUCUUCCGUAGUAUAGUGGUCAGUAUGCAAG
..((((((.(((((.((((...((((........(((...(((((......)))))....)))........)))).)))).).))))..)))))).. (-24.39)
......................................................................TCCGTAGTATAGTGGTCA.........	fox_18nt_0019956_0000001 + 71
......................................................................TCCGTAGTATAGTGGTCAG........	fox_19nt_0013521_0000003 + 71
......................................................................TCCGTAGTATAGTGGTCAGT.......	fox_20nt_0007850_0000007 + 71
......................................................................TCCGTAGTATAGTGGTCAGTA......	fox_21nt_0010654_0000005 + 71
......................................................................TCCGTAGTATAGTGGTCAGTAT.....	fox_22nt_0000871_0000087 + 71
......................................................................TCCGTAGTATAGTGGTCAGTATG....	fox_23nt_0000219_0000403 + 71
.......................................................................CCGTAGTATAGTGGTCAGT.......	fox_19nt_0084118_0000001 + 72
.......................................................................CCGTAGTATAGTGGTCAGTA......	fox_20nt_0013797_0000003 + 72
.......................................................................CCGTAGTATAGTGGTCAGTAT.....	fox_21nt_0003216_0000022 + 72
.......................................................................CCGTAGTATAGTGGTCAGTATG....	fox_22nt_0000268_0000346 + 72
.......................................................................CCGTAGTATAGTGGTCAGTATGC...	fox_23nt_0001072_0000063 + 72
........................................................................CGTAGTATAGTGGTCAGTA......	fox_19nt_0044578_0000001 + 73
........................................................................CGTAGTATAGTGGTCAGTAT.....	fox_20nt_0030496_0000002 + 73
........................................................................CGTAGTATAGTGGTCAGTATG....	fox_21nt_0006431_0000010 + 73
........................................................................CGTAGTATAGTGGTCAGTATGC...	fox_22nt_0008938_0000005 + 73
........................................................................CGTAGTATAGTGGTCAGTATGCA..	fox_23nt_0002202_0000024 + 73
.........................................................................GTAGTATAGTGGTCAGTA......	fox_18nt_0033779_0000001 + 74
.........................................................................GTAGTATAGTGGTCAGTATG....	fox_20nt_0058348_0000001 + 74
.........................................................................GTAGTATAGTGGTCAGTATGC...	fox_21nt_0079599_0000001 + 74
.........................................................................GTAGTATAGTGGTCAGTATGCA..	fox_22nt_0041193_0000001 + 74
..........................................................................TAGTATAGTGGTCAGTATG....	fox_19nt_0011543_0000003 + 75
..........................................................................TAGTATAGTGGTCAGTAT.....	fox_18nt_0051545_0000001 + 75
..........................................................................TAGTATAGTGGTCAGTATGCA..	fox_21nt_0091874_0000001 + 75
...........................................................................AGTATAGTGGTCAGTATG....	fox_18nt_0004206_0000007 + 76
...........................................................................AGTATAGTGGTCAGTATGCA..	fox_20nt_0011964_0000004 + 76
............................................................................GTATAGTGGTCAGTATGCA..	fox_19nt_0013294_0000003 + 77
............................................................................GTATAGTGGTCAGTATGC...	fox_18nt_0039091_0000001 + 77
.............................................................................TATAGTGGTCAGTATGCA..	fox_18nt_0007538_0000003 + 78
...............................................................................TAGTGGTCAGTATGCAAG	fox_18nt_0012991_0000002 + 80

>supercont2.14-_candidate_59_start_871071_stop_870858_length_214nt_hairpin_91_145_55nt_mappedmax_1 map_smallRNA_1
UCAUCAAGAUCGGUAAGGAGCUCGGUCUCCGUGGCUCUUACUCCGGUAUUGGUGC
.((((((.(((((..((((((((((...))).)))))))...))))).)))))). (-23.50)
TCATCAAGATCGGTAAGGAGCTC................................	fox_23nt_0041869_0000001 + 1

>supercont2.14-_candidate_5_start_240404_stop_240048_length_357nt_hairpin_43_125_83nt_mappedmax_5 map_smallRNA_5
CUCUUCCACAUGCAUCUAGUGAUAUUUCCUCGGUGACUCCAUCAAACCUCACUCAGACAUAUGCUAUCUGCUGGCGGAAGAUG
.((((((.((.(((..((((.((((.((...(((((............)))))..)).))))))))..)))))..)))))).. (-21.00)
........................................................ACATATGCTATCTGCTGGC........	fox_19nt_0085541_0000001 + 57
........................................................ACATATGCTATCTGCTGGCGGAAGAT.	fox_26nt_0022445_0000001 + 57
.........................................................CATATGCTATCTGCTGGCGGAAGATG	fox_26nt_0021000_0000001 + 58
..........................................................ATATGCTATCTGCTGGCG.......	fox_18nt_0020138_0000001 + 59
.................................................................ATCTGCTGGCGGAAGATG	fox_18nt_0030420_0000001 + 66

>supercont2.14-_candidate_68_start_961723_stop_961495_length_229nt_hairpin_31_219_189nt_mappedmax_1 map_smallRNA_1
UCGAUAUUUCGAGAUUGACGAGAAGCUCGUCUACUGCACUCCUGAUCGAUUCGUCAUGGAUCCUGAUGAGGCUGUUGAUCUGUGCGACGAGAACACCAUUGGCAUGUGCGCUAUUCUCGGAACUACUUACACUGGCGAGUAUGAGGAUAUCAAGGCCAUCAACGAUCUCCUCGUCGAGCGGAAUCUCGA
((((.((((((...((((((((...((((((....((((....(((((((((((((.(....)))))))....))))))).))))))))))........((((...((...((((((((....((((..(....)..)))))))))))).))..))))...........)))))))).)))))).)))) (-63.50)
TCGATATTTCGAGATTGACGA........................................................................................................................................................................	fox_21nt_0025768_0000002 + 1

>supercont2.14-_candidate_79_start_1028872_stop_1028552_length_321nt_hairpin_143_227_85nt_mappedmax_1 map_smallRNA_1
AAGGACAUGCACUAAGCGCUUCAUUACUUUCUUAUUUGUAACUUUUGGGAUUCCCAGCGGACUGGGAUGGGUUUAGGCGUUCCUG
.((((.((((.((((((.(..........(((((...........))))).((((((....)))))).).)))))))))))))). (-26.40)
AAGGACATGCACTAAGCGC..................................................................	fox_19nt_0077784_0000001 + 1

>supercont2.14-_candidate_83_start_1029860_stop_1029581_length_280nt_hairpin_66_129_64nt_mappedmax_1 map_smallRNA_1
ACCAGCCCCAUGGCCAACCUUCCCCGAUCCAAGAAGGACGAAGAGGAGAUGGAUGAGGAUGAGC
..((.((.(((..(((.(((((..((.(((.....)))))..)))).).)))))).)).))... (-15.60)
ACCAGCCCCATGGCCAAC..............................................	fox_18nt_0047175_0000001 + 1

>supercont2.14-_candidate_94_start_1084760_stop_1084524_length_237nt_hairpin_119_192_74nt_mappedmax_3 map_smallRNA_3
UCAGAAGAUUCUGGGUUCGAUCCCCAGCGUGAUCAGUUUCUUUUUGCUGUUUCUCGAUCUGAAUCUGUUUCUGA
(((((((((((.((((.(((....(((((.((......))....)))))....)))))))))))))...))))) (-20.70)
TCAGAAGATTCTGGGTTC........................................................	fox_18nt_0008255_0000003 + 1
TCAGAAGATTCTGGGTTCG.......................................................	fox_19nt_0002376_0000022 + 1
...GAAGATTCTGGGTTCGATCC...................................................	fox_20nt_0020157_0000002 + 4

>supercont2.15+_candidate_34_start_613728_stop_613993_length_266nt_hairpin_100_184_85nt_mappedmax_9 map_smallRNA_9
GGAUCGAUAGCUCAGCGGUAGAGCGAGGGAUUGCAGAUCCCUAGGUCGCGUGUUCGAUCCACGCUCGGUCCUGACCUUUUGUUCU
(((.(((.((.((((.((..(((((.((((((...))))))..(((((......)))))..)))))..)))))).)).))).))) (-29.90)
GGATCGATAGCTCAGCGG...................................................................	fox_18nt_0004534_0000006 + 1
GGATCGATAGCTCAGCGGT..................................................................	fox_19nt_0004176_0000011 + 1
GGATCGATAGCTCAGCGGTA.................................................................	fox_20nt_0007938_0000006 + 1
GGATCGATAGCTCAGCGGTAG................................................................	fox_21nt_0009567_0000006 + 1
GGATCGATAGCTCAGCGGTAGA...............................................................	fox_22nt_0003392_0000018 + 1
GGATCGATAGCTCAGCGGTAGAG..............................................................	fox_23nt_0006623_0000006 + 1
GGATCGATAGCTCAGCGGTAGAGC.............................................................	fox_24nt_0001324_0000041 + 1
.GATCGATAGCTCAGCGGTAGA...............................................................	fox_21nt_0084906_0000001 + 2
.GATCGATAGCTCAGCGGTAGAGC.............................................................	fox_23nt_0011824_0000003 + 2

>supercont2.15+_candidate_36_start_646688_stop_646905_length_218nt_hairpin_4_130_127nt_mappedmax_1 map_smallRNA_2
GCGUGCUGUGUUUGUUCCUGGGACUGAGUUCACGUGAAUGGUGUGCCUACUUAUACUGGUUCAAAACGCAGCCUUUCACCAGCAAAGCUCAAGCAAAGCAGCUUGGCGCAGUGGAAGCGCGGUAUGU
(((((((((((((.(..(((.(.(..(((((..(((((.((((((...(((......)))......)))).)).))))).......((....))...).))))..)).)))..)))))))))))))) (-40.70)
................................................................................................AGCAGCTTGGCGCAGTGG.............	fox_18nt_0036381_0000001 + 97
.............................................................................................................AGTGGAAGCGCGGTATGT	fox_18nt_0029345_0000001 + 110

>supercont2.15+_candidate_49_start_827043_stop_827258_length_216nt_hairpin_61_139_79nt_mappedmax_1 map_smallRNA_1
GACAAGCGAGGCUCGAUGCCUUAUGGUUUCGCGAGUUACGCGGAUAUUGCAGAGGCUCACGGUAUCGCCUACGCUUGUC
((((((((((((..((((((.......((((((.....))))))....((....))....)))))))))).)))))))) (-34.50)
...........................................................CGGTATCGCCTACGCTTGTC	fox_20nt_0072797_0000001 + 60

>supercont2.15+_candidate_51_start_827551_stop_827779_length_229nt_hairpin_42_128_87nt_mappedmax_1 map_smallRNA_1
AACCUUCUUAUCUUCUCCAUCUUCAGUGUCAUCUGGAGUUUCGUGUCCAACGUCGUCAAGGAUACGACUGGAGAAGUCAAGCAGGAU
..(((.(((..((((((((.((((((......))))))..((((((((...........)))))))).))))))))..))).))).. (-34.60)
...................................................................CTGGAGAAGTCAAGCAGGAT	fox_20nt_0020914_0000002 + 68

>supercont2.15-_candidate_104_start_980459_stop_980159_length_301nt_hairpin_62_119_58nt_mappedmax_1 map_smallRNA_1
AAACCUAGACACUAAGUCGUCCUUCAACAACCAACAAGCGACCGUGGUGUAGUGGUUA
.((((...((((((.(((((.................)))))..))))))...)))). (-15.83)
........................................ACCGTGGTGTAGTGGTTA	fox_18nt_0047727_0000001 + 41

>supercont2.15-_candidate_109_start_1044681_stop_1044457_length_225nt_hairpin_118_180_63nt_mappedmax_1 map_smallRNA_1
CGGACACAAGUGCGCCUACGACUGCGGCGAGGACGCCGAGUACAAGUACGGCGGCUGCGUCUG
(((((.((.((.(((((((.(((.(((((....))))))))....))).)))))))).))))) (-28.10)
CGGACACAAGTGCGCCTAC............................................	fox_19nt_0031761_0000001 + 1

>supercont2.15-_candidate_112_start_1066320_stop_1066108_length_213nt_hairpin_2_208_207nt_mappedmax_2 map_smallRNA_2
GUAGAUACUUUUUGCGAUGGUAGAUAUGGGAUGACAUUUUUCCUUUAUUUUGUAUCUGCUUCUAGAAGCGUAUUAUUCUUAGAUUGGAUAUUUGCAUCGAUUGGAUGUAUUUAUACGACAUUGACUUUUUAUGAGAGCCUUGAUUGACCUUGGUGAUGUUCUGCGGGGCCGCAACGUUUGAUUGAGACACCGUCGUGUAAGUUGUAG
...(((((((((((.((.(((((((((..(((((..........)))))..))))))))))))))))).)))))..(((......)))....((((((.....)))))).(((((((((.....(((.....))).............((..(((((((..((((....)))))))))..))..)).....)))))))))....... (-49.50)
GTAGATACTTTTTGCGATG............................................................................................................................................................................................	fox_19nt_0024144_0000002 + 1
GTAGATACTTTTTGCGATGGT..........................................................................................................................................................................................	fox_21nt_0018041_0000003 + 1

>supercont2.15-_candidate_115_start_1067606_stop_1067362_length_245nt_hairpin_14_144_131nt_mappedmax_2 map_smallRNA_2
AUCGCUGUGUUCUCGGUGUUUUCCAGGACGAUGAGUUCCCUGUUCUCGGCGACACUUUCCUCCGCGCUGCCUACGUCGUGUACGAUUGGGAUAACAGGAAUGUCUGGCUCGCUAACAACGAGGAUUGCGGU
(((((...(((((((.((((..(((((.......(((((.((((..(((((.(..........))))))((((.((((....))))))))..))))))))).)))))......)))).))))))).))))) (-39.10)
................................................................................................................TAACAACGAGGATTGCGG.	fox_18nt_0012190_0000002 + 113
.................................................................................................................AACAACGAGGATTGCGGT	fox_18nt_0052156_0000001 + 114

>supercont2.15-_candidate_119_start_1068614_stop_1068390_length_225nt_hairpin_6_73_68nt_mappedmax_2 map_smallRNA_2
GGUUUCCACCGGCGCACCCGUUGUAAAGGGCGUUACCAAGCGCCAAAACGAAGUCGCUCUUGAGAGCC
((((..((..((((.((.((((......((((((....))))))..))))..))))))..))..)))) (-23.20)
...............................................ACGAAGTCGCTCTTGAGAGC.	fox_20nt_0070663_0000001 + 48
.................................................GAAGTCGCTCTTGAGAGCC	fox_19nt_0063645_0000001 + 50

>supercont2.15-_candidate_121_start_1075138_stop_1074935_length_204nt_hairpin_84_171_88nt_mappedmax_2 map_smallRNA_2
GAAGACUAGGAAUGAUGAACAGAUUGUUGAAGAGUCGGCGUUGCAGUCGAUUGACUUGGAGGCGUUUGAUCCGUCGAUUCUAGACUUU
((((.((((((.(((((..((((((.((.((((((((((......)))))))..))).)).).)))))...))))).)))))).)))) (-25.40)
GAAGACTAGGAATGATGAAC....................................................................	fox_20nt_0018250_0000003 + 1
GAAGACTAGGAATGATGAACA...................................................................	fox_21nt_0058377_0000001 + 1

>supercont2.15-_candidate_18_start_288974_stop_288775_length_200nt_hairpin_98_155_58nt_mappedmax_2 map_smallRNA_2
GUGGACUGACGAUAUGAUAUGCAAGAUGGAAAGCAAAGCGUUUAUUCGUGGGGCCUAC
((((.((.((((.((((.((((....(....).....)))))))))))).))..)))) (-12.80)
GTGGACTGACGATATGATAT......................................	fox_20nt_0050231_0000001 + 1
.TGGACTGACGATATGATATGC....................................	fox_21nt_0105672_0000001 + 2

>supercont2.15-_candidate_1_start_3229_stop_3022_length_208nt_hairpin_61_167_107nt_mappedmax_3 map_smallRNA_1
GUAGCAGGAGUUUGGUUUCAUGAUUAAUUGUCGAGUUCACAACUGUAAGAUGGGAGAUUAAAUACGGAAAUUAAGGGAAUAGUUAUCUUGGACAAACGUCUUGCACG
((.(((((((((((..((((.(((.((((((...........(((((.(((.....)))...)))))...........))))))))).))))))))).)))))))). (-20.35)
...............................................................................TAGTTATCTTGGACAAACGTC.......	fox_21nt_0078828_0000001 + 80

>supercont2.15-_candidate_24_start_312092_stop_311859_length_234nt_hairpin_20_168_149nt_mappedmax_2 map_smallRNA_2
GGCUCUCAGCGUCGUGUCAUCGGCAUCAACAGCCGAAGAAAGUUCAAGAACUCUUACGAGUACGAGUGUUCGUUCGCUCUUGGUGAGAACGUCGGCAUGAAGAACGAGCGAUGGACUCCCAUGAUGUCUGCUGACAACGCCUGGUUGCC
(((..(((((((..(((((.((((((((...((((((((..(((....))))))).)).))..((((.((((((((.((((.(((.(.....)..))).)))).))))))).).))))...))))).))).)))))))).))))..))) (-52.70)
......................................................................................................................CCATGATGTCTGCTGACAAC...........	fox_20nt_0057276_0000001 + 119
...........................................................................................................................ATGTCTGCTGACAACGCCTGGTTGCC	fox_26nt_0038930_0000001 + 124

>supercont2.15-_candidate_29_start_412563_stop_412181_length_383nt_hairpin_2_225_224nt_mappedmax_1 map_smallRNA_1
GUACUCUCAGAUCUCCAAGCCCCAGAAGACCGUCCAGCGCGCCUACGGUGGUUCCCGAUGCGGUAACUGUGUCCGCGACCGUAUCGUCCGAGCUUUCCUCAUUGAGGAGCAGAAGAUCGUCAAGAAGGUGCUCAAGGAGCAGGAGCAGAGCCAGAAGAAGAAAUAAAUGCAAUUUCCAUUGCUAGGUUAGGCUUUGCGUGGGAAAGGCAAGGAACUCUGAGGAC
....(((((((..(((..(((...........(((.(((((((((.(((.(((((.((((((((...(((....))))))))))).(((((((...(((..((((.((........)).))))..))).))))..)))...)))))...)))................(((((....))))).....)))))...)))).)))..)))..)))..))))))).. (-76.82)
..............................................................................................................................................................................................................GCAAGGAACTCTGAGGAC	fox_18nt_0027784_0000001 + 207

>supercont2.15-_candidate_3_start_22691_stop_22287_length_405nt_hairpin_176_358_183nt_mappedmax_28 map_smallRNA_28
UGAGAGUCGAUGACUGGUUGUGGAGUUGCUCUCUCGAGUGUUAUGAAGACUCCAGUGUUCGGGCUGCUGGUAGCCCGUUUUGGGUUAUCAGUAUCCUGGGCCGGUCGAGAUGACUGAGUAAACCGGCUUGUCUGACCUAUCACACGCUCCUUUUGCUUCUCUAUACUCUUCGUCCGAUUCUAG
..(((((((((((..(((.((((((..((......((((((..(((..........(((((((.((((((((((((.....)))))))))))).))))))).((((.(((..((((.(....)))).)..)))))))..))).)))))).....))..)))))))))..)))).))))))).. (-71.70)
TGAGAGTCGATGACTGGTTGTGG................................................................................................................................................................	fox_23nt_0025670_0000001 + 1
TGAGAGTCGATGACTGGTTGTGGA...............................................................................................................................................................	fox_24nt_0003313_0000012 + 1
.GAGAGTCGATGACTGGTTG...................................................................................................................................................................	fox_19nt_0015917_0000002 + 2
.GAGAGTCGATGACTGGTT....................................................................................................................................................................	fox_18nt_0040679_0000001 + 2
.GAGAGTCGATGACTGGTTGTGG................................................................................................................................................................	fox_22nt_0083764_0000001 + 2
.GAGAGTCGATGACTGGTTGTGGA...............................................................................................................................................................	fox_23nt_0003970_0000011 + 2
.GAGAGTCGATGACTGGTTGTGGAG..............................................................................................................................................................	fox_24nt_0049107_0000001 + 2
.GAGAGTCGATGACTGGTTGTGGAGT.............................................................................................................................................................	fox_25nt_0022383_0000001 + 2
.GAGAGTCGATGACTGGTTGTGGAGTT............................................................................................................................................................	fox_26nt_0005059_0000005 + 2
..AGAGTCGATGACTGGTTGTGG................................................................................................................................................................	fox_21nt_0029572_0000002 + 3
..AGAGTCGATGACTGGTTGTGGA...............................................................................................................................................................	fox_22nt_0003930_0000015 + 3
..AGAGTCGATGACTGGTTGTGGAG..............................................................................................................................................................	fox_23nt_0019860_0000002 + 3
..AGAGTCGATGACTGGTTGTGGAGT.............................................................................................................................................................	fox_24nt_0014073_0000002 + 3
...GAGTCGATGACTGGTTGTGGA...............................................................................................................................................................	fox_21nt_0010487_0000005 + 4
...GAGTCGATGACTGGTTGTGGAG..............................................................................................................................................................	fox_22nt_0031107_0000001 + 4
...GAGTCGATGACTGGTTGTGGAGT.............................................................................................................................................................	fox_23nt_0068116_0000001 + 4
....AGTCGATGACTGGTTGTGG................................................................................................................................................................	fox_19nt_0012852_0000003 + 5
....AGTCGATGACTGGTTGTGGA...............................................................................................................................................................	fox_20nt_0004201_0000014 + 5
....AGTCGATGACTGGTTGTGGAG..............................................................................................................................................................	fox_21nt_0070903_0000001 + 5
....AGTCGATGACTGGTTGTGGAGT.............................................................................................................................................................	fox_22nt_0012968_0000003 + 5
....AGTCGATGACTGGTTGTGGAGTT............................................................................................................................................................	fox_23nt_0035096_0000001 + 5
....AGTCGATGACTGGTTGTGGAGTTGCT.........................................................................................................................................................	fox_26nt_0044347_0000001 + 5
.....GTCGATGACTGGTTGTGGA...............................................................................................................................................................	fox_19nt_0013588_0000003 + 6
.....GTCGATGACTGGTTGTGGAGTT............................................................................................................................................................	fox_22nt_0031166_0000001 + 6
.....GTCGATGACTGGTTGTGGAGTTGCT.........................................................................................................................................................	fox_25nt_0044740_0000001 + 6
.......CGATGACTGGTTGTGGAGTTGCT.........................................................................................................................................................	fox_23nt_0022983_0000002 + 8
.........ATGACTGGTTGTGGAGTTGCT.........................................................................................................................................................	fox_21nt_0096982_0000001 + 10
..........TGACTGGTTGTGGAGTTGC..........................................................................................................................................................	fox_19nt_0022496_0000002 + 11

>supercont2.15-_candidate_40_start_513739_stop_513487_length_253nt_hairpin_96_189_94nt_mappedmax_6 map_smallRNA_6
GCACGCUGGAGAAAGACUUUGAGACGCCUGAUUGUCUCAGGAGAAUUACCGAACGACUUAGAUCUGAUUGCUCAAAGUGAUCUAUCAGUCGUGC
((((((((((((...((((((((...(((((.....))))).........((.(......).))......))))))))..))).)))).))))) (-28.60)
GCACGCTGGAGAAAGACTTTGA........................................................................	fox_22nt_0089886_0000001 + 1
...CGCTGGAGAAAGACTTTGA........................................................................	fox_19nt_0023781_0000002 + 4
...CGCTGGAGAAAGACTTTGAGAC.....................................................................	fox_22nt_0026962_0000002 + 4
....GCTGGAGAAAGACTTTGA........................................................................	fox_18nt_0014495_0000002 + 5
....GCTGGAGAAAGACTTTGAGAC.....................................................................	fox_21nt_0014777_0000004 + 5
......................................................................CTCAAAGTGATCTATCAGT.....	fox_19nt_0015119_0000002 + 71

>supercont2.15-_candidate_47_start_515056_stop_514835_length_222nt_hairpin_45_153_109nt_mappedmax_1 map_smallRNA_1
CCUCUACUAUCCGCAAGAUGCAGACUGGUGGCCCCGAUGGUGACCUGGGCAGCAACGAGAUAAAGCUUGGUAACGAGAAGUACACUGCCAUUGUGGAUGGCUCUGGAGU
.(((((((((((((((...((((.((.((.((((....(....)..))))....)).))......((((....)))).......))))..))))))))))...))))). (-38.60)
CCTCTACTATCCGCAAGATGC........................................................................................	fox_21nt_0045315_0000001 + 1

>supercont2.15-_candidate_49_start_515542_stop_515232_length_311nt_hairpin_106_292_187nt_mappedmax_2 map_smallRNA_2
CUUCGAUGAGAACUACGGUCUUGCCAGCACACAGCAGCGCAAGAACAAGGACAUUCCCGAGGGUGGCUCCAAGGGUGUUAUUCUGUUGGACCCUAAGCAGCAGAACCGUGCCCGUGAGGCUUUCGAGAAGUACAUUGAUAGUAUCCUUGAUCUUCUUCUGCCCGCCGAGACCCCUGGUAUCAAGAAC
.(((..(((..((((.(((((((...((.....((((...((((.((((((..(((.(((((((..(((...(((..(..((((((((.........))))))))..)..)))..)))))))))).))).(((.......))))))))).))))...))))..)))))))))..)))).))).))). (-58.20)
CTTCGATGAGAACTACGGT........................................................................................................................................................................	fox_19nt_0026497_0000001 + 1
..TCGATGAGAACTACGGTCTT.....................................................................................................................................................................	fox_20nt_0063867_0000001 + 3

>supercont2.15-_candidate_52_start_516177_stop_515973_length_205nt_hairpin_12_112_101nt_mappedmax_1 map_smallRNA_1
AAUUGAGGAGUCCAUUGACCAGAUCUCCAAGGAGGUUUCUCUCCUCUACUGUCUCCCCCACAACAAGUUCCACAACCUUUUCCUCGAUGGACAGCUCAGCC
..(((((..(((((((((..((((.....((((((....)))))).....))))............(((....))).......)))))))))..))))).. (-24.80)
...................................................................................TCGATGGACAGCTCAGCC	fox_18nt_0032676_0000001 + 84

>supercont2.15-_candidate_54_start_516486_stop_516246_length_241nt_hairpin_99_235_137nt_mappedmax_2 map_smallRNA_2
CGAGGUCUUCGAUAUUGAGAACACCGACGAGAAGCGAAUGGUCGUUGCCUUCCGCUCUCGCACUGCCCAGGGUCUUUUCUCUGCCCUCAGUGACCUUUACCACUACUAUGGCGUCACCUCAUCUCGAAAGUACCUCG
((((((((((((...((((.((.((..(((((.(((...(((....)))...))))))))(((((...(((((.........)))))))))).................)).))...))))..))).))).)))))) (-44.10)
CGAGGTCTTCGATATTGA.......................................................................................................................	fox_18nt_0034971_0000001 + 1
CGAGGTCTTCGATATTGAGA.....................................................................................................................	fox_20nt_0023662_0000002 + 1

>supercont2.15-_candidate_57_start_517086_stop_516854_length_233nt_hairpin_102_172_71nt_mappedmax_2 map_smallRNA_2
GUUCACUGGCAAGCCUGAGCAGAAGAAGACUGUGAAGUCUAUCAUCUCAGCUGCUGGUUUCGUCCCCGAGC
((((...((((((((..(((((.((((((((....)))))....)))...)))))))))).)))...)))) (-21.70)
.TTCACTGGCAAGCCTGAGC...................................................	fox_19nt_0049509_0000001 + 2
.....................................................CTGGTTTCGTCCCCGAGC	fox_18nt_0032209_0000001 + 54

>supercont2.15-_candidate_75_start_647905_stop_647622_length_284nt_hairpin_111_168_58nt_mappedmax_7 map_smallRNA_7
CAAUUGGUUAGCGUGUCAGACUUUUACAAAACAUUGAAAUCUGAAAGUUACGAGUUCG
.((((.((.(((...(((((.(((((........))))))))))..))))).)))).. (-10.80)
.AATTGGTTAGCGTGTCAGA......................................	fox_19nt_0069048_0000001 + 2
.AATTGGTTAGCGTGTCAGAC.....................................	fox_20nt_0071402_0000001 + 2
.....................................AATCTGAAAGTTACGAGTTC.	fox_20nt_0092101_0000001 + 38
.....................................AATCTGAAAGTTACGAGTTCG	fox_21nt_0003488_0000020 + 38
.......................................TCTGAAAGTTACGAGTTC.	fox_18nt_0012133_0000002 + 40
.......................................TCTGAAAGTTACGAGTTCG	fox_19nt_0001135_0000051 + 40
........................................CTGAAAGTTACGAGTTCG	fox_18nt_0008769_0000003 + 41

>supercont2.15-_candidate_83_start_775842_stop_775523_length_320nt_hairpin_10_178_169nt_mappedmax_3 map_smallRNA_2
CCUUUGCUCCUCGUUUUUGUUAUGCUACUACUUUCUGGAAGGCGUCUGUCUUUUGUGAUAGAAGCGAGAAGAAUGGCCAUGGCUUGCACUUGAACUGGAUCAGAGAUACCUCUUUACUAUUUUUAUCAUGACGGAUCGGAUGGGGACUCUACAAGAAGAGGAGGAAAAG
..(((.((((((.(((((((...(((....((((...)))).(((((((((.(..((((((((.((((..(...(((....)))..).))))...(((...((((....))))...))).))))))))..).))).)))))).)).)...))))))))))))).))).. (-45.10)
...............................................................................................................................................GGACTCTACAAGAAGAGGAGGA....	fox_22nt_0025749_0000002 + 144
....................................................................................................................................................CTACAAGAAGAGGAGGAAAAG	fox_21nt_0077718_0000001 + 149

>supercont2.15-_candidate_88_start_777252_stop_776966_length_287nt_hairpin_123_187_65nt_mappedmax_3 map_smallRNA_3
UUCUUGAAGACCAUCCUCCCAUUGUCGGAUGAACUGAACGACAUUUUGGGACGGAUCUUCGAGCC
..((((((((...((((((((.(((((...........)))))...))))).))))))))))).. (-26.20)
...........................................TTTTGGGACGGATCTTCGAGCC	fox_22nt_0073266_0000001 + 44
............................................TTTGGGACGGATCTTCGAG..	fox_19nt_0068286_0000001 + 45
.............................................TTGGGACGGATCTTCGAGC.	fox_19nt_0048681_0000001 + 46

>supercont2.15-_candidate_91_start_777738_stop_777463_length_276nt_hairpin_51_270_220nt_mappedmax_2 map_smallRNA_3
ACUGCAUCUAUGUUAUUCUCGAGUACUGCCCUGAGGGCGAUCUCUUCUUGAAUAUCACUGAGCGCGGUCAAUAUGUUGGUAAGGAUGAACUAUCAAGGAAUAUCUUUCUGCAAAUCCUGGAUGCUGUUGAACACUGCCACAACCUUGGAAUCUACCACCGGGACCUCAAGCCGGAGAACAUCUUGGUGACAGACCACGGAGACACUGUUAAGCUGGCUGA
...((.((..((.(((((..(((...(((((...)))))..))).....))))).))..))))..((((....(((.((((..(.(.(((((((.((((....(.....)....)))).))))..))).).)..))))))).((.(((......)))..))))))...((((((..((((((((.(((......))).))))...))))...)))))).. (-57.50)
................................................TGAATATCACTGAGCGCGGT........................................................................................................................................................	fox_20nt_0029966_0000002 + 49
.................................................GAATATCACTGAGCGCGGT........................................................................................................................................................	fox_19nt_0066129_0000001 + 50
..........................................................................................................................................................................................................CACTGTTAAGCTGGCTGA	fox_18nt_0043822_0000001 + 203

>supercont2.15-_candidate_98_start_876172_stop_875907_length_266nt_hairpin_39_148_110nt_mappedmax_16 map_smallRNA_16
AACGCGAGCGGAACAGAAUCUGAGAGCACUUUGCAAUGCCGCUGCUAACCGAAGUUGUAAGGUUUCAUGGUCUAACGGUUAUGACUGCGGAUUCUGAUUCCGCCAGCGAG
..(((..(((((((((((((((((...((((((((((..((........))..)))))))))).(((((..(....)..))))))).))))))))).))))))..))).. (-46.10)
....................................................................................CTGCGGATTCTGATTCCG........	fox_18nt_0003512_0000009 + 85
....................................................................................CTGCGGATTCTGATTCCGC.......	fox_19nt_0012229_0000003 + 85
....................................................................................CTGCGGATTCTGATTCCGCC......	fox_20nt_0026629_0000002 + 85
.....................................................................................TGCGGATTCTGATTCCGC.......	fox_18nt_0011931_0000002 + 86
.....................................................................................TGCGGATTCTGATTCCGCC......	fox_19nt_0047812_0000001 + 86
.....................................................................................TGCGGATTCTGATTCCGCCAG....	fox_21nt_0058797_0000001 + 86
.....................................................................................TGCGGATTCTGATTCCGCCAGC...	fox_22nt_0078433_0000001 + 86
.......................................................................................CGGATTCTGATTCCGCCAGC...	fox_20nt_0011304_0000004 + 88
........................................................................................GGATTCTGATTCCGCCAG....	fox_18nt_0047798_0000001 + 89
........................................................................................GGATTCTGATTCCGCCAGC...	fox_19nt_0067663_0000001 + 89
.........................................................................................GATTCTGATTCCGCCAGC...	fox_18nt_0044292_0000001 + 90
.........................................................................................GATTCTGATTCCGCCAGCGA.	fox_20nt_0029218_0000002 + 90
..........................................................................................ATTCTGATTCCGCCAGCGAG	fox_20nt_0012943_0000004 + 91
...........................................................................................TTCTGATTCCGCCAGCGAG	fox_19nt_0009233_0000004 + 92
...........................................................................................TTCTGATTCCGCCAGCGA.	fox_18nt_0042728_0000001 + 92
............................................................................................TCTGATTCCGCCAGCGAG	fox_18nt_0042224_0000001 + 93

>supercont2.15-_candidate_99_start_889610_stop_889341_length_270nt_hairpin_64_136_73nt_mappedmax_19 map_smallRNA_19
GUUAAACUCCGUUUGAAGCCUACCAUUUCACCGAGGGUCCUAUAGUCUAGUGGUUAGGACGUUGGAUUUUGAU
((((((.((((..((...(((((((((..((..((....))...))..))))).)))).)).)))).)))))) (-17.80)
................................................AGTGGTTAGGACGTTGGA.......	fox_18nt_0002400_0000014 + 49
................................................AGTGGTTAGGACGTTGGATTT....	fox_21nt_0035208_0000002 + 49
.................................................GTGGTTAGGACGTTGGATT.....	fox_19nt_0006345_0000006 + 50
.................................................GTGGTTAGGACGTTGGATTT....	fox_20nt_0051063_0000001 + 50
.................................................GTGGTTAGGACGTTGGATTTTG..	fox_22nt_0012930_0000003 + 50
..................................................TGGTTAGGACGTTGGATT.....	fox_18nt_0000715_0000066 + 51
..................................................TGGTTAGGACGTTGGATTT....	fox_19nt_0002196_0000024 + 51
..................................................TGGTTAGGACGTTGGATTTT...	fox_20nt_0006008_0000009 + 51
..................................................TGGTTAGGACGTTGGATTTTG..	fox_21nt_0016058_0000003 + 51
..................................................TGGTTAGGACGTTGGATTTTGA.	fox_22nt_0014836_0000003 + 51
..................................................TGGTTAGGACGTTGGATTTTGAT	fox_23nt_0017093_0000002 + 51
...................................................GGTTAGGACGTTGGATTTT...	fox_19nt_0022931_0000002 + 52
...................................................GGTTAGGACGTTGGATTTTGA.	fox_21nt_0023890_0000002 + 52
....................................................GTTAGGACGTTGGATTTT...	fox_18nt_0007181_0000003 + 53
....................................................GTTAGGACGTTGGATTTTG..	fox_19nt_0007874_0000005 + 53
....................................................GTTAGGACGTTGGATTTTGA.	fox_20nt_0010295_0000005 + 53
....................................................GTTAGGACGTTGGATTTTGAT	fox_21nt_0023494_0000002 + 53
.....................................................TTAGGACGTTGGATTTTG..	fox_18nt_0006004_0000004 + 54
.....................................................TTAGGACGTTGGATTTTGAT	fox_20nt_0014963_0000003 + 54

>supercont2.16+_candidate_4_start_80837_stop_81053_length_217nt_hairpin_122_203_82nt_mappedmax_4 map_smallRNA_1
UAUCGCCAGAACGACGAGAGGGAUUCCCUAAACACGCUGCUUCGCUGGCCUGUUCCGGAGCGCUGCCUCGUUGCUGGCGAUU
.((((((((..(((((((((.(.((((...((((.(((((...)).))).))))..))))).))..))))))))))))))). (-33.00)
TATCGCCAGAACGACGAG................................................................	fox_18nt_0048083_0000001 + 1

>supercont2.16+_candidate_9_start_706017_stop_706238_length_222nt_hairpin_49_107_59nt_mappedmax_1 map_smallRNA_1
UGCAUAGGAAGAAAGCAGCAUUGACGAUAAUCCUGCAGUCUCUUUUCUGCGCCUGUGCU
.(((((((.((((((.((.((((.((.......)))))))).))))))...))))))). (-18.90)
TGCATAGGAAGAAAGCAGCA.......................................	fox_20nt_0098341_0000001 + 1

>supercont2.16-_candidate_12_start_180994_stop_180742_length_253nt_hairpin_145_199_55nt_mappedmax_1 map_smallRNA_1
UCUGAUGGUGCUGAGUUCACUGUCGCUAAGCAGGGUGAUUCACCUACUAUUCAGA
((((((((((.(((((.((((.(.((...))).))))))))).).)))).))))) (-16.20)
..................................GTGATTCACCTACTATTCAGA	fox_21nt_0048111_0000001 + 35

>supercont2.16-_candidate_16_start_369410_stop_369202_length_209nt_hairpin_38_156_119nt_mappedmax_1 map_smallRNA_1
CUUCUUCAAUGCCAUUGAUGGGUCCAUGCUGCAGAUCAGGGAUCAGAGUGAUCUGAAGAGCAUUGUGGAUAUCCUUGACGAUGACAACAAGGGGUUACCCGCACUUGACAUUGAAGAGA
.((((((((((.((.((.(((((((.((.((((..((((((((((.((((.((....)).)))).))...))))))))...)).)).)).))....)))))))..)).)))))))))). (-39.50)
CTTCTTCAATGCCATTGATG...................................................................................................	fox_20nt_0075862_0000001 + 1

>supercont2.16-_candidate_31_start_780130_stop_779911_length_220nt_hairpin_2_199_198nt_mappedmax_1 map_smallRNA_1
GUCGUCGAAGAGUUCUUGUGUUCGGUUGCUCUGCUGGGCGAUCAUGAAGCCGGUGUUCUGCAUAACCUUGCCCUUUUCGUCGCGGUUUCGUGGAGAAUCGGGAUCGUUUGCUAGCGCAAGAAGUGUCUUGUCUGUGAUGUUCCAUAGCUUCAUUAACCAUUCGAAUGGUACCUGGGGGUACAUGAAUUCUGCGUCGGC
((((.((.(((((((.((((..(((((((((....)))))))).((((((..(((((..(((.(((....(((..(((..((((....))))..)))..)))...)))))).)))))..(.((..((........))..)).)...))))))...(((((....)))))......)..)))).))))))).)).)))) (-67.60)
..................................................................................................................................................................................TACATGAATTCTGCGTCGGC	fox_20nt_0076148_0000001 + 179

>supercont2.16-_candidate_46_start_1091169_stop_1090968_length_202nt_hairpin_61_116_56nt_mappedmax_1 map_smallRNA_1
AGUCGAGCCUCCUCUGAGCCAGGCCUACGGCUAUGGCAUCGUUGUUGGUCUCGGCU
(((((((((..(..(((((((((((...)))).)))).)))..)..)).))))))) (-25.20)
......................................TCGTTGTTGGTCTCGGCT	fox_18nt_0028734_0000001 + 39

>supercont2.16-_candidate_4_start_82301_stop_82083_length_219nt_hairpin_17_78_62nt_mappedmax_3 map_smallRNA_1
UGCUUCUUCGAUAUCAUGGAUCAGAGCUGUCACCAGGUCUGUCGCAGACCUCUUGGGAAGCG
.(((((((.((..((.((((.((((.(((....))).)))))).))))..))..))))))). (-20.60)
.........................................TCGCAGACCTCTTGGGAAGC.	fox_20nt_0055128_0000001 + 42

>supercont2.16-_candidate_5_start_154501_stop_154278_length_224nt_hairpin_135_204_70nt_mappedmax_101 map_smallRNA_104
UCUCCUGUAAAAAUUCUUUCUUGGCACGCACUGUUAGUGCGGUGCUAGGAGCGGGAUUUUCUGCAGGCCA
...((((((((((((((((((((((((((((.....)))).)))))))))).)))))))).))))))... (-32.90)
TCTCCTGTAAAAATTCTT....................................................	fox_18nt_0004023_0000007 + 1
TCTCCTGTAAAAATTCTTT...................................................	fox_19nt_0045042_0000001 + 1
TCTCCTGTAAAAATTCTTTC..................................................	fox_20nt_0027664_0000002 + 1
TCTCCTGTAAAAATTCTTTCTTGGC.............................................	fox_25nt_0003215_0000011 + 1
.CTCCTGTAAAAATTCTTT...................................................	fox_18nt_0005126_0000005 + 2
.CTCCTGTAAAAATTCTTTCT.................................................	fox_20nt_0011220_0000004 + 2
.CTCCTGTAAAAATTCTTTCTT................................................	fox_21nt_0016102_0000003 + 2
.CTCCTGTAAAAATTCTTTCTTGG..............................................	fox_23nt_0071229_0000001 + 2
.CTCCTGTAAAAATTCTTTCTTGGC.............................................	fox_24nt_0001943_0000024 + 2
.CTCCTGTAAAAATTCTTTCTTGGCA............................................	fox_25nt_0002024_0000022 + 2
..TCCTGTAAAAATTCTTTC..................................................	fox_18nt_0049519_0000001 + 3
..TCCTGTAAAAATTCTTTCTTGG..............................................	fox_22nt_0014967_0000003 + 3
..TCCTGTAAAAATTCTTTCTTGGC.............................................	fox_23nt_0003931_0000012 + 3
..TCCTGTAAAAATTCTTTCTTGGCA............................................	fox_24nt_0004244_0000008 + 3
..TCCTGTAAAAATTCTTTCTTGGCAC...........................................	fox_25nt_0008944_0000003 + 3
...CCTGTAAAAATTCTTTCT.................................................	fox_18nt_0008804_0000003 + 4
...CCTGTAAAAATTCTTTCTT................................................	fox_19nt_0066834_0000001 + 4
...CCTGTAAAAATTCTTTCTTG...............................................	fox_20nt_0061255_0000001 + 4
...CCTGTAAAAATTCTTTCTTGGC.............................................	fox_22nt_0001872_0000037 + 4
...CCTGTAAAAATTCTTTCTTGGCA............................................	fox_23nt_0000698_0000103 + 4
...CCTGTAAAAATTCTTTCTTGGCAC...........................................	fox_24nt_0003444_0000011 + 4
....CTGTAAAAATTCTTTCTTG...............................................	fox_19nt_0008623_0000004 + 5
....CTGTAAAAATTCTTTCTTGGC.............................................	fox_21nt_0002286_0000032 + 5
....CTGTAAAAATTCTTTCTTGGCA............................................	fox_22nt_0004945_0000011 + 5
....CTGTAAAAATTCTTTCTTGGCAC...........................................	fox_23nt_0019561_0000002 + 5
.....TGTAAAAATTCTTTCTTGG..............................................	fox_19nt_0005553_0000007 + 6
.....TGTAAAAATTCTTTCTTGGC.............................................	fox_20nt_0001608_0000042 + 6
.....TGTAAAAATTCTTTCTTGGCA............................................	fox_21nt_0014988_0000004 + 6
.....TGTAAAAATTCTTTCTTGGCAC...........................................	fox_22nt_0078530_0000001 + 6
......GTAAAAATTCTTTCTTGGC.............................................	fox_19nt_0009442_0000004 + 7
......GTAAAAATTCTTTCTTGG..............................................	fox_18nt_0040931_0000001 + 7
......GTAAAAATTCTTTCTTGGCA............................................	fox_20nt_0053906_0000001 + 7
.......TAAAAATTCTTTCTTGGC.............................................	fox_18nt_0005867_0000004 + 8
.......TAAAAATTCTTTCTTGGCA............................................	fox_19nt_0017049_0000002 + 8
.......TAAAAATTCTTTCTTGGCACG..........................................	fox_21nt_0017880_0000003 + 8
.......TAAAAATTCTTTCTTGGCACGC.........................................	fox_22nt_0026350_0000002 + 8
.......TAAAAATTCTTTCTTGGCACGCA........................................	fox_23nt_0007333_0000005 + 8
........................................GGTGCTAGGAGCGGGATTTTCTGC......	fox_24nt_0028737_0000001 + 41
........................................GGTGCTAGGAGCGGGATTTTCTGCA.....	fox_25nt_0044122_0000001 + 41
........................................GGTGCTAGGAGCGGGATTTTCTGCAGGC..	fox_28nt_0004853_0000005 + 41
........................................GGTGCTAGGAGCGGGATTTTCTGCAGGCC.	fox_29nt_0043928_0000001 + 41
........................................GGTGCTAGGAGCGGGATTTTCTGCAGGCCA	fox_30nt_0012623_0000002 + 41
.........................................GTGCTAGGAGCGGGATTTTCTG.......	fox_22nt_0011029_0000004 + 42
.........................................GTGCTAGGAGCGGGATTTTCTGC......	fox_23nt_0067382_0000001 + 42
.........................................GTGCTAGGAGCGGGATTTTCTGCA.....	fox_24nt_0058152_0000001 + 42
.........................................GTGCTAGGAGCGGGATTTTCTGCAG....	fox_25nt_0014451_0000002 + 42
.........................................GTGCTAGGAGCGGGATTTTCTGCAGG...	fox_26nt_0038552_0000001 + 42
.........................................GTGCTAGGAGCGGGATTTTCTGCAGGC..	fox_27nt_0000285_0000240 + 42
.........................................GTGCTAGGAGCGGGATTTTCTGCAGGCC.	fox_28nt_0000839_0000069 + 42
.........................................GTGCTAGGAGCGGGATTTTCTGCAGGCCA	fox_29nt_0004952_0000005 + 42
..........................................TGCTAGGAGCGGGATTTTCT........	fox_20nt_0107708_0000001 + 43
..........................................TGCTAGGAGCGGGATTTTCTG.......	fox_21nt_0003090_0000023 + 43
..........................................TGCTAGGAGCGGGATTTTCTGC......	fox_22nt_0005178_0000010 + 43
..........................................TGCTAGGAGCGGGATTTTCTGCA.....	fox_23nt_0005197_0000008 + 43
..........................................TGCTAGGAGCGGGATTTTCTGCAG....	fox_24nt_0009435_0000003 + 43
..........................................TGCTAGGAGCGGGATTTTCTGCAGG...	fox_25nt_0003893_0000008 + 43
..........................................TGCTAGGAGCGGGATTTTCTGCAGGC..	fox_26nt_0000485_0000137 + 43
..........................................TGCTAGGAGCGGGATTTTCTGCAGGCC.	fox_27nt_0001354_0000035 + 43
..........................................TGCTAGGAGCGGGATTTTCTGCAGGCCA	fox_28nt_0003293_0000010 + 43
...........................................GCTAGGAGCGGGATTTTCT........	fox_19nt_0053419_0000001 + 44
...........................................GCTAGGAGCGGGATTTTCTG.......	fox_20nt_0012825_0000004 + 44
...........................................GCTAGGAGCGGGATTTTCTGCA.....	fox_22nt_0004309_0000013 + 44
...........................................GCTAGGAGCGGGATTTTCTGCAGG...	fox_24nt_0009412_0000003 + 44
...........................................GCTAGGAGCGGGATTTTCTGCAGGC..	fox_25nt_0000093_0000855 + 44
...........................................GCTAGGAGCGGGATTTTCTGCAGGCC.	fox_26nt_0000468_0000143 + 44
...........................................GCTAGGAGCGGGATTTTCTGCAGGCCA	fox_27nt_0002412_0000015 + 44
............................................CTAGGAGCGGGATTTTCT........	fox_18nt_0009038_0000003 + 45
............................................CTAGGAGCGGGATTTTCTG.......	fox_19nt_0001796_0000030 + 45
............................................CTAGGAGCGGGATTTTCTGC......	fox_20nt_0007253_0000007 + 45
............................................CTAGGAGCGGGATTTTCTGCA.....	fox_21nt_0009357_0000006 + 45
............................................CTAGGAGCGGGATTTTCTGCAG....	fox_22nt_0005482_0000010 + 45
............................................CTAGGAGCGGGATTTTCTGCAGG...	fox_23nt_0065912_0000001 + 45
............................................CTAGGAGCGGGATTTTCTGCAGGC..	fox_24nt_0000800_0000077 + 45
............................................CTAGGAGCGGGATTTTCTGCAGGCC.	fox_25nt_0001292_0000039 + 45
............................................CTAGGAGCGGGATTTTCTGCAGGCCA	fox_26nt_0003817_0000008 + 45
.............................................TAGGAGCGGGATTTTCTG.......	fox_18nt_0000480_0000104 + 46
.............................................TAGGAGCGGGATTTTCTGC......	fox_19nt_0001236_0000046 + 46
.............................................TAGGAGCGGGATTTTCTGCA.....	fox_20nt_0003806_0000015 + 46
.............................................TAGGAGCGGGATTTTCTGCAG....	fox_21nt_0000889_0000092 + 46
.............................................TAGGAGCGGGATTTTCTGCAGG...	fox_22nt_0002275_0000029 + 46
.............................................TAGGAGCGGGATTTTCTGCAGGC..	fox_23nt_0000389_0000211 + 46
.............................................TAGGAGCGGGATTTTCTGCAGGCC.	fox_24nt_0000773_0000081 + 46
.............................................TAGGAGCGGGATTTTCTGCAGGCCA	fox_25nt_0003069_0000012 + 46
..............................................AGGAGCGGGATTTTCTGC......	fox_18nt_0048115_0000001 + 47
..............................................AGGAGCGGGATTTTCTGCA.....	fox_19nt_0069491_0000001 + 47
..............................................AGGAGCGGGATTTTCTGCAGGC..	fox_22nt_0001309_0000055 + 47
..............................................AGGAGCGGGATTTTCTGCAGGCC.	fox_23nt_0003187_0000015 + 47
..............................................AGGAGCGGGATTTTCTGCAGGCCA	fox_24nt_0006073_0000005 + 47
...............................................GGAGCGGGATTTTCTGCAGGC..	fox_21nt_0009457_0000006 + 48
...............................................GGAGCGGGATTTTCTGCAGGCC.	fox_22nt_0006707_0000008 + 48
...............................................GGAGCGGGATTTTCTGCAGGCCA	fox_23nt_0006190_0000006 + 48
................................................GAGCGGGATTTTCTGCAGGC..	fox_20nt_0011586_0000004 + 49
................................................GAGCGGGATTTTCTGCAGGCC.	fox_21nt_0012499_0000004 + 49
................................................GAGCGGGATTTTCTGCAGGCCA	fox_22nt_0012516_0000004 + 49
.................................................AGCGGGATTTTCTGCAGG...	fox_18nt_0019170_0000001 + 50
.................................................AGCGGGATTTTCTGCAGGC..	fox_19nt_0000983_0000060 + 50
.................................................AGCGGGATTTTCTGCAGGCC.	fox_20nt_0002114_0000030 + 50
.................................................AGCGGGATTTTCTGCAGGCCA	fox_21nt_0001491_0000051 + 50
..................................................GCGGGATTTTCTGCAGGC..	fox_18nt_0000864_0000053 + 51
..................................................GCGGGATTTTCTGCAGGCC.	fox_19nt_0002282_0000023 + 51
..................................................GCGGGATTTTCTGCAGGCCA	fox_20nt_0002882_0000021 + 51
...................................................CGGGATTTTCTGCAGGCC.	fox_18nt_0000017_0003151 + 52
...................................................CGGGATTTTCTGCAGGCCA	fox_19nt_0000049_0001492 + 52
....................................................GGGATTTTCTGCAGGCCA	fox_18nt_0000943_0000047 + 53

>supercont2.17+_candidate_104_start_802039_stop_802261_length_223nt_hairpin_97_213_117nt_mappedmax_2 map_smallRNA_2
ACCUACUGUAGAUGAAGGCGUCGAUAUGAUCCCAUUAAGCAAGCUGUUGCCAGGCUCAUAUUGCCGGUCGGCGGACACCCAAUUGCUGUACUUUGGAUGUUUUCAGUUGCUGUAGGA
.(((((.((((.((((((((((...(((....)))..(((((.((((((((.(((.......))))).))))))........)))))........)))))))))).)))).))))). (-40.00)
ACCTACTGTAGATGAAGGCG.................................................................................................	fox_20nt_0019909_0000002 + 1
.CCTACTGTAGATGAAGGCG.................................................................................................	fox_19nt_0049236_0000001 + 2

>supercont2.17+_candidate_105_start_878599_stop_878824_length_226nt_hairpin_68_126_59nt_mappedmax_2 map_smallRNA_2
AGGUAGCGAGUUUACAGGAUUAUGUCUUAGCAUGGCGGCGUCUUGUGGAGUUUUUAUUU
((((((.((.((((((((((..((((.......))))..)))))))))).)).)))))) (-16.50)
...................................CGGCGTCTTGTGGAGTTTTTATTT	fox_24nt_0041541_0000001 + 36
......................................CGTCTTGTGGAGTTTTTATTT	fox_21nt_0059703_0000001 + 39

>supercont2.17+_candidate_106_start_890833_stop_891165_length_333nt_hairpin_30_202_173nt_mappedmax_4 map_smallRNA_4
GCGGCUUGAGAGGUAUAAGAAGGACGGAAUGUCGCUGCUUGAUUGAGUUCAUUAUCACAUUAAACUACUUCACUUACAUCUACAACCCAAAUCAACACACUCGACUCACAAUGGAUUUCGUCAAGAACGCUAUGUCUGGUGGCUCCAAGUCUGGUGAUGCCUCCAAGAGCGGC
((.((((..(((((((.....(((((((..((((((.((((((.(((((((((........................................................))))))))).))))))............)))))))))..))))....)))))))...)))).)) (-40.26)
............................................................................................................CAATGGATTTCGTCAAGA...............................................	fox_18nt_0009569_0000002 + 109
............................................................................................................CAATGGATTTCGTCAAGAA..............................................	fox_19nt_0052328_0000001 + 109
.............................................................................................................AATGGATTTCGTCAAGAAC.............................................	fox_19nt_0014428_0000002 + 110
...........................................................................................................................................................GATGCCTCCAAGAGCGGC	fox_18nt_0012312_0000002 + 156

>supercont2.17+_candidate_107_start_891024_stop_891316_length_293nt_hairpin_8_231_224nt_mappedmax_3 map_smallRNA_3
CGGCAGCAACAACCAGGAGGACUACGUCGAUAAGGGUACAUGCCCUUCAAAUAUCUCAUGGACCUUGACAAAUCACUGACAUUCAUAGGUGUUGAUUUCCUCAACAAGAAGGUCGGUGUGAACAUCUCCCGCGACAACCAGGAGAAGGCCACCGACUUUGCCCGCAGCCAGUACGAGAAGUCAACUGGGUAAGUGGCUUUUGUCCUUGUGGCUUGAAACUGUGG
(.((((...((((((.((((((...((((..((((((....))))))...........(((.((.........(((((((.(((.....((((((.....)))))).))).)))))))......(((((.(.(....)).))))).))))).))))...((((..(.(((((((.....))..))))).)..).)))....)))))).))).)))...)))).) (-71.40)
CGGCAGCAACAACCAGGAG.............................................................................................................................................................................................................	fox_19nt_0018326_0000002 + 1
CGGCAGCAACAACCAGGAGG............................................................................................................................................................................................................	fox_20nt_0103915_0000001 + 1
CGGCAGCAACAACCAGGAGGA...........................................................................................................................................................................................................	fox_21nt_0092556_0000001 + 1

>supercont2.17+_candidate_18_start_157306_stop_157535_length_230nt_hairpin_114_185_72nt_mappedmax_1 map_smallRNA_1
UGAGGACGACGAUGACGAGGAGUUCUGCGACACCACCACCACCCUCGAGGCUACCGUCACCGUUGUCCCUUA
...((((((((.(((((.(.(((.((.(((..............)))))))).)))))).)))))))).... (-23.74)
TGAGGACGACGATGACGA......................................................	fox_18nt_0054945_0000001 + 1

>supercont2.17+_candidate_21_start_197073_stop_197294_length_222nt_hairpin_2_71_70nt_mappedmax_1 map_smallRNA_1
AGGCCUGUCGACGCAUGGGCAUUGUUCGGUGGAGUAUGAUUUCGGGACAGGGUCCCUGGUCAAUCGGCUU
(((((.((.(((.((.((((.((((((..((((((...)))))))))))).)))).))))).)).))))) (-23.80)
AGGCCTGTCGACGCATGGGC..................................................	fox_20nt_0059602_0000001 + 1

>supercont2.17+_candidate_37_start_271297_stop_271522_length_226nt_hairpin_100_204_105nt_mappedmax_2 map_smallRNA_2
UGGACUACUCACUACUAGUUGGCAUACAUGAUGUCUCUCGAGGGAAUGAAGAGAACCUUCGUGACAAGACACUGCAAGUAUUCAACCCCGGUGGUGAGAAGUCCC
.(((((.(((((((((.(((((.((((.((.((((((.((((((...........)))))).))...))))...)).)))))))))...))))))))).))))). (-41.00)
TGGACTACTCACTACTAGTTGGCA.................................................................................	fox_24nt_0015408_0000002 + 1
TGGACTACTCACTACTAGTTGGCATACA.............................................................................	fox_28nt_0007465_0000003 + 1

>supercont2.17+_candidate_42_start_322176_stop_322380_length_205nt_hairpin_35_134_100nt_mappedmax_1 map_smallRNA_1
UACAAGACUGACCGACCCCGAUACGAGGCCACAGCUCGGGAGUGGACUCGAAAGUACGCCAUCUAAAGCGAAUACCAUGGCCGGUGCGGUUAGACUUGGG
..((((.((((((((((.........(((((..(((..(((.(((...(....)....))))))..)))........)))))))).))))))).)))).. (-34.80)
TACAAGACTGACCGACCC..................................................................................	fox_18nt_0027037_0000001 + 1

>supercont2.17+_candidate_64_start_405806_stop_406030_length_225nt_hairpin_99_166_68nt_mappedmax_1 map_smallRNA_1
UUUUAUGGACACUUUGCGGAAGGAUACGGUGGUUACCCGGUUUAGUACUGCGGCAGAUUGAUCCGAAA
.....((((((.(((((.(.((....(((.(....))))........)).).))))).)).))))... (-15.80)
TTTTATGGACACTTTGCGGAAG..............................................	fox_22nt_0047049_0000001 + 1

>supercont2.17+_candidate_74_start_504450_stop_504839_length_390nt_hairpin_27_220_194nt_mappedmax_6 map_smallRNA_6
UCGGUCGCUACGUCGUCGACACCAGCCGAUAAGCGCGCGGCUGUCGCUUGGGCAGUGCGCCAAAAAGCAAAAGCACGCCCCAAAAGAGAUAAACAGGGCUACCCAUCGCGCAAAGGGGUUUACCCUCUAAAGAGGAGUUCAGGCGGGAGUUGAUUUGGGUUUUCUGGCGGGUGUUGUCGAAGUAGCCAGAUGGA
((.((((((((.(((.(((((((.((((..((((.(.(((((.((((((((((..(((((......((....))..((((...............))))........)))))...........((((....)))).)))))))))).)))))....).))))..)))).))))))).))).)))))..))).)) (-80.16)
.......CTACGTCGTCGACACCAGCCGATAAGCG...............................................................................................................................................................	fox_28nt_0051230_0000001 + 8
..........CGTCGTCGACACCAGCCGATAAGC................................................................................................................................................................	fox_24nt_0043400_0000001 + 11
.......................................................................................................................................................................CGGGTGTTGTCGAAGTAGCCAGATGGA	fox_27nt_0044463_0000001 + 168
...........................................................................................................................................................................TGTTGTCGAAGTAGCCAGATGG.	fox_22nt_0038674_0000001 + 172
...........................................................................................................................................................................TGTTGTCGAAGTAGCCAGATGGA	fox_23nt_0026870_0000001 + 172
...............................................................................................................................................................................GTCGAAGTAGCCAGATGGA	fox_19nt_0062854_0000001 + 176

>supercont2.17+_candidate_81_start_572913_stop_573132_length_220nt_hairpin_43_119_77nt_mappedmax_1 map_smallRNA_1
ACUUCCGUCCGAUACAACACAACCAUUUUUUUUUUUUCAACCAAGAAGAAAGCCCGGCGUUGGUUUGAGGCGGAAGA
.(((((((((((..((((.(.....(((((((((........))))))))).....).))))..))).)))))))). (-24.60)
.........................................................CGTTGGTTTGAGGCGGAAGA	fox_20nt_0026605_0000002 + 58

>supercont2.17+_candidate_94_start_704933_stop_705155_length_223nt_hairpin_21_123_103nt_mappedmax_8 map_smallRNA_7
CACAGCUCGUCCGAUUGUGCGAGAUCUGCACUGUAUGUCUUGGUAUGAACGGGAUUCAUAUCAUUGCAUACAGUGUCGGACUUGCACACUCGUUCGAGCUGCG
..(((((((..(((.((((((((.((((((((((((((..(((((((((.....)))))))))..)))))))))).)))))))))))).)))..))))))).. (-61.30)
.ACAGCTCGTCCGATTGTGCGA.................................................................................	fox_21nt_0098536_0000001 + 2
.ACAGCTCGTCCGATTGTGCGAGATC.............................................................................	fox_25nt_0025992_0000001 + 2
...AGCTCGTCCGATTGTGCGAGAT..............................................................................	fox_22nt_0045871_0000001 + 4
........................................................................GTGTCGGACTTGCACACTCGTTCGAGCTGC.	fox_30nt_0008242_0000003 + 73
...............................................................................ACTTGCACACTCGTTCGAGCTGC.	fox_23nt_0061519_0000001 + 80
...............................................................................ACTTGCACACTCGTTCGAGCTGCG	fox_24nt_0015738_0000002 + 80
.................................................................................TTGCACACTCGTTCGAGCTGCG	fox_22nt_0010774_0000004 + 82

>supercont2.17+_candidate_96_start_730294_stop_730534_length_241nt_hairpin_62_193_132nt_mappedmax_2 map_smallRNA_3
GAUGUCAAGGUUACUAGCAGCACUGGAAAGAGCGUUGUUGUUAAGAACGUUGGCGUUACUGCUGGGGCUCAGUACAAGGCUAGCUCUAACUUCUAAGCUGUUAGUGUAAGCUUAGGGUGUUGAGUUGGCGAG
((((((((.(((..((((((((.((.......)).))))))))..))).))))))))..(((((.....)))))....((((((((.((((((((((((.........))))))))).)))))))))))... (-48.50)
GATGTCAAGGTTACTAGCAGCACTGG..........................................................................................................	fox_26nt_0016172_0000001 + 1
...................................TGTTGTTAAGAACGTTGGCGT............................................................................	fox_21nt_0082847_0000001 + 36
...........................................................................AAGGCTAGCTCTAACTTCTAAGCT.................................	fox_24nt_0055078_0000001 + 76

>supercont2.17+_candidate_97_start_730487_stop_730696_length_210nt_hairpin_19_125_107nt_mappedmax_5 map_smallRNA_5
UGUGGCGCGUUCAUGUGCUGAAGUAUUUGGCGGCAAGUGUAGGUUAGGCAGCUGGCUGCUUUGACUGGGAACUCGUUGAUGAGAUACUUGAGCACUGAAGGACCAUA
(((((..(.((((.(((((.((((((((.(((((.(((...((((((((((....)))).))))))....))).)))).).)))))))).))))))))).).))))) (-44.80)
.........TTCATGTGCTGAAGTATTTGGCGGC.........................................................................	fox_25nt_0048727_0000001 + 10
..............................................................................ATGAGATACTTGAGCACTGAA........	fox_21nt_0069668_0000001 + 79
..................................................................................GATACTTGAGCACTGAAGGACCATA	fox_25nt_0048840_0000001 + 83
...................................................................................ATACTTGAGCACTGAAGGACCA..	fox_22nt_0038979_0000001 + 84
...................................................................................ATACTTGAGCACTGAAGGACCATA	fox_24nt_0035831_0000001 + 84

>supercont2.17-_candidate_15_start_63692_stop_63465_length_228nt_hairpin_99_157_59nt_mappedmax_1 map_smallRNA_1
UUGAACUUCGUGGACGAGAACGACGAGGUCCUCCUGGCUGGUUUCGGUCGCAAGGGCAA
.((..(((.(((..(((((.((.(.(((....))).).)).)))))..))))))..)). (-19.40)
TTGAACTTCGTGGACGAGAAC......................................	fox_21nt_0034206_0000002 + 1

>supercont2.17-_candidate_16_start_77204_stop_76973_length_232nt_hairpin_10_148_139nt_mappedmax_1 map_smallRNA_1
AAUGGUUCGUUGAACUGGUGAUUCUUGUGGAAGUUGAUGCGUAUUCUUGAGCUGACACUUUUGGCUGUCAUUGAAUAUCACCACUCAUCUCAAACGUGGAGACUAGACUUCUUCCUUCAACAUCAUUCAUCGAACCAUG
.((((((((.((((.(((((........(((((((.....((((((.(((((..(.....)..))..)))..))))))..((((...........))))......)))))))........))))))))).)))))))). (-39.29)
........................................................................................................................CATCATTCATCGAACCATG	fox_19nt_0025966_0000001 + 121

>supercont2.17-_candidate_32_start_236304_stop_236082_length_223nt_hairpin_102_181_80nt_mappedmax_4 map_smallRNA_4
AGGACCAGGACUUCGCUGAGGCUACCAAGGAGCCCGGUCUGGCUUUCGCCUUCGGUCGCUUCGACGGUAUCCUCGGUCUC
.(((((((((..(((.((((((.(((((((((((......))))....)))).))).)))))).)))..)))).))))). (-36.40)
AGGACCAGGACTTCGCTGAGG...........................................................	fox_21nt_0078287_0000001 + 1
..GACCAGGACTTCGCTGAGGC..........................................................	fox_20nt_0047699_0000001 + 3
....CCAGGACTTCGCTGAGGC..........................................................	fox_18nt_0028389_0000001 + 5
....CCAGGACTTCGCTGAGGCTACC......................................................	fox_22nt_0077197_0000001 + 5

>supercont2.17-_candidate_59_start_555069_stop_554841_length_229nt_hairpin_6_65_60nt_mappedmax_1 map_smallRNA_1
GGGAUACCGCCGGUCAGGAGCGUUUCCGAACCAUCACCUCUUCCUACUACCGUGGUGCCC
(((.((((((.(((.(((((.(.....((....))....))))))...)))))))))))) (-17.30)
GGGATACCGCCGGTCAGGAGC.......................................	fox_21nt_0085648_0000001 + 1

>supercont2.17-_candidate_66_start_620299_stop_620083_length_217nt_hairpin_19_210_192nt_mappedmax_1 map_smallRNA_1
GGUGAAUCUGGUAUGGGAACUGUCGAGGGAUUCUUCAUCUCAUACCUCGCUUUGCCUGUUGUCCUUGUCUUCUGGGCUAUUGGUUACUUGUGGAAGCGCGAGGGUUGGCUCUCAAUCGACAAGAUCGAUGUUGACACUGGUCGACGUGAGCACAAUUGGGACGAGAUCAACGCCUACCGUGCCAAGGUUGCC
(((.((((((((((((.....(.(((((................)))))).......((((..((((((((...............((((((....)))))).((((((((...(((((.....)))))((((((....))))))..)))).)))).))))))))..)))).....))))))).)))))))) (-62.89)
GGTGAATCTGGTATGGGA..............................................................................................................................................................................	fox_18nt_0021970_0000001 + 1

>supercont2.17-_candidate_71_start_676067_stop_675845_length_223nt_hairpin_127_218_92nt_mappedmax_1 map_smallRNA_1
ACGAGAGAGAGAGAGCAGAAAAGCGUGUGGAUGUGUGUUGUGGUUCAAUCAAACUAUUCGACAACGUUAACCUUUUCUUUCCCCCCUUUCGA
.((((((.(.(.(((.(((((((.((...(((((.((((((((((......)))))..)))))))))).)))))))))))).).))))))). (-27.00)
.......................................................................CTTTTCTTTCCCCCCTTTCGA	fox_21nt_0048428_0000001 + 72

>supercont2.17-_candidate_77_start_800900_stop_800670_length_231nt_hairpin_101_167_67nt_mappedmax_2 map_smallRNA_2
GCACCAUCUGAGGAUUGCUUAGGAAGGCAAUAGUUUUUAUUGUCGAGGUACGUCUGAAAGAUGCUGC
(((.(((((..(((((((((.....((((((((...)))))))).))))).))))...))))).))) (-20.80)
.....ATCTGAGGATTGCTTAGG............................................	fox_18nt_0024583_0000001 + 6
.................................................ACGTCTGAAAGATGCTGC	fox_18nt_0009967_0000002 + 50

>supercont2.18+_candidate_2_start_431328_stop_431546_length_219nt_hairpin_4_96_93nt_mappedmax_4 map_smallRNA_1
AGUGCACAACAAACGUUUCAAUCUGCGCUUUGCGCAGUCGCAAGCCGCGGCGAUGGCUUCGUCUACAGCAGAUUGAGGCGUUUGUUGUGCUCU
((.(((((((((((((((((((((((.....(((.(((((...((....))..))))).))).....))))))))))))))))))))))).)) (-51.40)
..TGCACAACAAACGTTTCAATCTG....................................................................	fox_23nt_0031546_0000001 + 3

>supercont2.18+_candidate_6_start_860943_stop_861160_length_218nt_hairpin_83_178_96nt_mappedmax_11 map_smallRNA_9
UCUGGGUGGCUGUAACGAAGCCAGAUCUCCUACUGAAGCAAAAGACGUGCUGAGCUAGCUAGGUACAGGGAAACCCCGCUUCCUUCACCAUCCAGC
.((((((((.((.((.(((((.......(((((((.((((.......))))....))).))))....((....))..))))).)))))))))))). (-31.90)
TCTGGGTGGCTGTAACGA..............................................................................	fox_18nt_0003003_0000011 + 1
TCTGGGTGGCTGTAACGAA.............................................................................	fox_19nt_0005704_0000007 + 1
TCTGGGTGGCTGTAACGAAG............................................................................	fox_20nt_0010966_0000004 + 1
TCTGGGTGGCTGTAACGAAGC...........................................................................	fox_21nt_0015411_0000003 + 1
..TGGGTGGCTGTAACGAAG............................................................................	fox_18nt_0000912_0000049 + 3
..TGGGTGGCTGTAACGAAGC...........................................................................	fox_19nt_0000454_0000145 + 3
..TGGGTGGCTGTAACGAAGCC..........................................................................	fox_20nt_0029562_0000002 + 3
...GGGTGGCTGTAACGAAGC...........................................................................	fox_18nt_0020546_0000001 + 4
......TGGCTGTAACGAAGCCAG........................................................................	fox_18nt_0029286_0000001 + 7

>supercont2.18-_candidate_11_start_836067_stop_835844_length_224nt_hairpin_56_125_70nt_mappedmax_11 map_smallRNA_13
UCUCCUGUAAAACUUUUUCCUUGGCACCCGCUGUUAGCGCUCUGCUAGGGUAGAGAAUUUUUGCAGGCUA
...(((((((((.(((((((((((((..(((.....)))...))))))))..))))).)))))))))... (-26.80)
.......................................CTCTGCTAGGGTAGAGAATTTTTGCAGGC..	fox_29nt_0016476_0000001 + 40
........................................TCTGCTAGGGTAGAGAATTTTTGCAGGC..	fox_28nt_0019035_0000001 + 41
.........................................CTGCTAGGGTAGAGAATTTTTGCAGGC..	fox_27nt_0005715_0000004 + 42
..........................................TGCTAGGGTAGAGAATTTTTGCAGGC..	fox_26nt_0002525_0000015 + 43
..........................................TGCTAGGGTAGAGAATTTTTGCAGGCT.	fox_27nt_0005965_0000004 + 43
...........................................GCTAGGGTAGAGAATTTTTGCAGGC..	fox_25nt_0003604_0000009 + 44
...........................................GCTAGGGTAGAGAATTTTTGCAGGCT.	fox_26nt_0006884_0000003 + 44
............................................CTAGGGTAGAGAATTTTTGCAGGC..	fox_24nt_0014175_0000002 + 45
.............................................TAGGGTAGAGAATTTTTGCAG....	fox_21nt_0048327_0000001 + 46
.............................................TAGGGTAGAGAATTTTTGCAGGC..	fox_23nt_0013129_0000003 + 46
..................................................TAGAGAATTTTTGCAGGC..	fox_18nt_0016684_0000001 + 51
..................................................TAGAGAATTTTTGCAGGCT.	fox_19nt_0065569_0000001 + 51
..................................................TAGAGAATTTTTGCAGGCTA	fox_20nt_0097471_0000001 + 51

>supercont2.18-_candidate_13_start_847106_stop_846823_length_284nt_hairpin_100_154_55nt_mappedmax_2 map_smallRNA_1
GGACAAAGCUGGACAAUGACCAAAUGCAGUUUUGCGGUCGAUGCCGGGAGUGUUG
.((((...((((.((.(((((....((......))))))).))))))...)))). (-16.90)
GGACAAAGCTGGACAATGA....................................	fox_19nt_0039971_0000001 + 1

>supercont2.18-_candidate_15_start_847415_stop_847213_length_203nt_hairpin_12_147_136nt_mappedmax_35 map_smallRNA_22
AUAUUGACGCCGAUGACUAUUUCAACUUGCUGCUUUCACCUGAUCGACCACGGAGGUACCUCAAACAAUUAGGGGUAGAGUCUGAUUCCGAUCUAGGGGACGAAGACGAGAACGACGAUAAUGAUUGCGUGGAUGG
.((((.((((.(((.(.((((((..((((((.(.(((.((((((((....((((..((((((.........))))))...))))....))))).)))))).).)).))))...)).)))).).))))))).)))). (-35.70)
......................................................................................TCCGATCTAGGGGACGAAG...............................	fox_19nt_0011680_0000003 + 87
......................................................................................TCCGATCTAGGGGACGAA................................	fox_18nt_0039659_0000001 + 87
......................................................................................TCCGATCTAGGGGACGAAGA..............................	fox_20nt_0003491_0000017 + 87
......................................................................................TCCGATCTAGGGGACGAAGAC.............................	fox_21nt_0004779_0000014 + 87
......................................................................................TCCGATCTAGGGGACGAAGACG............................	fox_22nt_0025056_0000002 + 87
.......................................................................................CCGATCTAGGGGACGAAGA..............................	fox_19nt_0013389_0000003 + 88
.......................................................................................CCGATCTAGGGGACGAAGAC.............................	fox_20nt_0021910_0000002 + 88
.......................................................................................CCGATCTAGGGGACGAAGACG............................	fox_21nt_0092066_0000001 + 88
........................................................................................CGATCTAGGGGACGAAGACGA...........................	fox_21nt_0028152_0000002 + 89
...........................................................................................TCTAGGGGACGAAGACGA...........................	fox_18nt_0014762_0000002 + 92
...........................................................................................TCTAGGGGACGAAGACGAG..........................	fox_19nt_0009961_0000004 + 92
...........................................................................................TCTAGGGGACGAAGACGAGA.........................	fox_20nt_0019626_0000002 + 92
.............................................................................................TAGGGGACGAAGACGAGA.........................	fox_18nt_0015630_0000002 + 94
.............................................................................................TAGGGGACGAAGACGAGAA........................	fox_19nt_0036500_0000001 + 94
..............................................................................................AGGGGACGAAGACGAGAAC.......................	fox_19nt_0010566_0000003 + 95
..........................................................................................................CGAGAACGACGATAATGATTGC........	fox_22nt_0088063_0000001 + 107
...............................................................................................................ACGACGATAATGATTGCGTGG....	fox_21nt_0034611_0000002 + 112
...............................................................................................................ACGACGATAATGATTGCGTGGA...	fox_22nt_0024525_0000002 + 112
.................................................................................................................GACGATAATGATTGCGTGGAT..	fox_21nt_0062545_0000001 + 114
..................................................................................................................ACGATAATGATTGCGTGGAT..	fox_20nt_0106359_0000001 + 115
...................................................................................................................CGATAATGATTGCGTGGATG.	fox_20nt_0098591_0000001 + 116
...................................................................................................................CGATAATGATTGCGTGGATGG	fox_21nt_0065947_0000001 + 116

>supercont2.18-_candidate_16_start_1095887_stop_1095664_length_224nt_hairpin_56_125_70nt_mappedmax_11 map_smallRNA_13
UCUCCUGUAAAACUUUUUCCUUGGCACCCGCUGUUAGCGCUCUGCUAGGGUAGAGAAUUUUUGCAGGCUA
...(((((((((.(((((((((((((..(((.....)))...))))))))..))))).)))))))))... (-26.80)
.......................................CTCTGCTAGGGTAGAGAATTTTTGCAGGC..	fox_29nt_0016476_0000001 + 40
........................................TCTGCTAGGGTAGAGAATTTTTGCAGGC..	fox_28nt_0019035_0000001 + 41
.........................................CTGCTAGGGTAGAGAATTTTTGCAGGC..	fox_27nt_0005715_0000004 + 42
..........................................TGCTAGGGTAGAGAATTTTTGCAGGC..	fox_26nt_0002525_0000015 + 43
..........................................TGCTAGGGTAGAGAATTTTTGCAGGCT.	fox_27nt_0005965_0000004 + 43
...........................................GCTAGGGTAGAGAATTTTTGCAGGC..	fox_25nt_0003604_0000009 + 44
...........................................GCTAGGGTAGAGAATTTTTGCAGGCT.	fox_26nt_0006884_0000003 + 44
............................................CTAGGGTAGAGAATTTTTGCAGGC..	fox_24nt_0014175_0000002 + 45
.............................................TAGGGTAGAGAATTTTTGCAG....	fox_21nt_0048327_0000001 + 46
.............................................TAGGGTAGAGAATTTTTGCAGGC..	fox_23nt_0013129_0000003 + 46
..................................................TAGAGAATTTTTGCAGGC..	fox_18nt_0016684_0000001 + 51
..................................................TAGAGAATTTTTGCAGGCT.	fox_19nt_0065569_0000001 + 51
..................................................TAGAGAATTTTTGCAGGCTA	fox_20nt_0097471_0000001 + 51

>supercont2.18-_candidate_18_start_1106929_stop_1106646_length_284nt_hairpin_80_144_65nt_mappedmax_2 map_smallRNA_2
GGCAAUCCUCCGCGAGUUCUGGACAAAGCUGGACAAUGACCAAAUGCAGUUUUGCGGUCGAUGCC
((((.((..(((((((..(((.(......(((.......)))..).))).)))))))..)))))) (-19.10)
...AATCCTCCGCGAGTTCTGG...........................................	fox_19nt_0036464_0000001 + 4
....................GGACAAAGCTGGACAATGA..........................	fox_19nt_0039971_0000001 + 21

>supercont2.18-_candidate_19_start_1107088_stop_1106871_length_218nt_hairpin_49_206_158nt_mappedmax_3 map_smallRNA_2
GUCGCCGUGGUCCUGCCCCUGGUACAGGAGGGCGGCCAAGAAAAUCUCGAAGGCAAACUCGAUCGUCGAUGCCGCCACGGCGUAUUCGGAGUCCAGUGAUAAUUCCACCUGAAGAAUCGGCGGUCUUUCAUGCGCAAGAUCCGGUGUGGAAUGGCGAC
((((((((..(((((((((((...))))..((((((...((.....((((.(.....)))))...))...))))))...((((((..((((.((..((((..(((.....)))..))))..)).)))).)))))).......)))).))))))))))) (-54.90)
...........................................................................................................................................TCCGGTGTGGAATGGCGA.	fox_18nt_0006543_0000004 + 140
...........................................................................................................................................TCCGGTGTGGAATGGCGAC	fox_19nt_0003400_0000014 + 140

>supercont2.18-_candidate_20_start_1107237_stop_1107035_length_203nt_hairpin_12_147_136nt_mappedmax_35 map_smallRNA_22
AUAUUGACGCCGAUGACUAUUUCAACUUGCUGCUUUCACCUGAUCGACCACGGAGGUACCUCAAACAAUUAGGGGUAGAGUCUGAUUCCGAUCUAGGGGACGAAGACGAGAACGACGAUAAUGAUUGCGUGGAUGG
.((((.((((.(((.(.((((((..((((((.(.(((.((((((((....((((..((((((.........))))))...))))....))))).)))))).).)).))))...)).)))).).))))))).)))). (-35.70)
......................................................................................TCCGATCTAGGGGACGAAG...............................	fox_19nt_0011680_0000003 + 87
......................................................................................TCCGATCTAGGGGACGAA................................	fox_18nt_0039659_0000001 + 87
......................................................................................TCCGATCTAGGGGACGAAGA..............................	fox_20nt_0003491_0000017 + 87
......................................................................................TCCGATCTAGGGGACGAAGAC.............................	fox_21nt_0004779_0000014 + 87
......................................................................................TCCGATCTAGGGGACGAAGACG............................	fox_22nt_0025056_0000002 + 87
.......................................................................................CCGATCTAGGGGACGAAGA..............................	fox_19nt_0013389_0000003 + 88
.......................................................................................CCGATCTAGGGGACGAAGAC.............................	fox_20nt_0021910_0000002 + 88
.......................................................................................CCGATCTAGGGGACGAAGACG............................	fox_21nt_0092066_0000001 + 88
........................................................................................CGATCTAGGGGACGAAGACGA...........................	fox_21nt_0028152_0000002 + 89
...........................................................................................TCTAGGGGACGAAGACGA...........................	fox_18nt_0014762_0000002 + 92
...........................................................................................TCTAGGGGACGAAGACGAG..........................	fox_19nt_0009961_0000004 + 92
...........................................................................................TCTAGGGGACGAAGACGAGA.........................	fox_20nt_0019626_0000002 + 92
.............................................................................................TAGGGGACGAAGACGAGA.........................	fox_18nt_0015630_0000002 + 94
.............................................................................................TAGGGGACGAAGACGAGAA........................	fox_19nt_0036500_0000001 + 94
..............................................................................................AGGGGACGAAGACGAGAAC.......................	fox_19nt_0010566_0000003 + 95
..........................................................................................................CGAGAACGACGATAATGATTGC........	fox_22nt_0088063_0000001 + 107
...............................................................................................................ACGACGATAATGATTGCGTGG....	fox_21nt_0034611_0000002 + 112
...............................................................................................................ACGACGATAATGATTGCGTGGA...	fox_22nt_0024525_0000002 + 112
.................................................................................................................GACGATAATGATTGCGTGGAT..	fox_21nt_0062545_0000001 + 114
..................................................................................................................ACGATAATGATTGCGTGGAT..	fox_20nt_0106359_0000001 + 115
...................................................................................................................CGATAATGATTGCGTGGATG.	fox_20nt_0098591_0000001 + 116
...................................................................................................................CGATAATGATTGCGTGGATGG	fox_21nt_0065947_0000001 + 116

>supercont2.18-_candidate_5_start_431427_stop_431205_length_223nt_hairpin_0_222_223nt_mappedmax_4 map_smallRNA_1
ACAAGAGCACAACAAACGCCUCAAUCUGCUGUAGACGAAGCCAUCGCCGCGGCUUGCGACUGCGCAAAGCGCAGAUUGAAACGUUUGUUGUGCACUUGUUAAGGAUUUAGGUGUAGAUAGGGCCACUUUCUUAACACUUGUAUGCCAAGAAAGUGAGAUGACAAAAGGAGAAAUAAGUACCCUUCCCUGUCACUUUAAUCCACCUGCCGUUAGGGCGAACCAG
(((((.((((((((((((..((((((((((((((.(((((((........))))).)).)))))......)))))))))..)))))))))))).)))))...(((((.((((...(((((((.(((((((((..((......))..))))))))).........((((............))))))))))))))).)))))...((((.....))))...... (-83.90)
...........................................................................TTGAAACGTTTGTTGTGCACT...............................................................................................................................	fox_21nt_0102984_0000001 + 76

>supercont2.18-_candidate_8_start_747109_stop_746866_length_244nt_hairpin_57_235_179nt_mappedmax_2 map_smallRNA_5
GCUUUCAGAGAAGGAAUUUUGGAGAGUUCGCCUUCUCUGACAACAACUUUGUCGGAUCUAAUGGCGGCACCCCAGAACCAGAACGCCUUAGAUAUCGGAGGACGAUGCCCAUGGGCAUCGGUAGCGACAUCCUCCCGAUCAACGACGCCGAUUGCGAUGGGUUUUUCUCCUUUGAAGGC
((((((((((.(((((.(((((.(.(((((((...((((((((.....))))))))......))))).)))))))).(((...(((....(((...(((((((((((((....))))))).........))))))..)))..((....))...))).)))...))))).)))))))))) (-67.00)
.........................................................................AGAACCAGAACGCCTTAGA.......................................................................................	fox_19nt_0045383_0000001 + 74
................................................................................................................................................ACGCCGATTGCGATGGGTTT...............	fox_20nt_0011218_0000004 + 145
................................................................................................................................................................GTTTTTCTCCTTTGAAGGC	fox_19nt_0008810_0000004 + 161
................................................................................................................................................................GTTTTTCTCCTTTGAAGG.	fox_18nt_0045668_0000001 + 161
.................................................................................................................................................................TTTTTCTCCTTTGAAGGC	fox_18nt_0014234_0000002 + 162

>supercont2.18-_candidate_9_start_747216_stop_747000_length_217nt_hairpin_48_117_70nt_mappedmax_58 map_smallRNA_58
UCCCCUGUAAAAAUUCUUUCUUGGCACGCACUGUUAGUGCGGUGCUAGGAGCGGGAUUUUCUACGGGCCA
...((((((((((((((((((((((((((((.....)))).)))))))))).)))))))).))))))... (-32.40)
TCCCCTGTAAAAATTCTT....................................................	fox_18nt_0003083_0000010 + 1
TCCCCTGTAAAAATTCTTT...................................................	fox_19nt_0014398_0000002 + 1
TCCCCTGTAAAAATTCTTTCT.................................................	fox_21nt_0090423_0000001 + 1
TCCCCTGTAAAAATTCTTTCTTG...............................................	fox_23nt_0064359_0000001 + 1
TCCCCTGTAAAAATTCTTTCTTGGC.............................................	fox_25nt_0013998_0000002 + 1
.CCCCTGTAAAAATTCTTT...................................................	fox_18nt_0005891_0000004 + 2
.CCCCTGTAAAAATTCTTTCT.................................................	fox_20nt_0030301_0000002 + 2
.CCCCTGTAAAAATTCTTTCTTGG..............................................	fox_23nt_0067396_0000001 + 2
.CCCCTGTAAAAATTCTTTCTTGGC.............................................	fox_24nt_0054571_0000001 + 2
.CCCCTGTAAAAATTCTTTCTTGGCA............................................	fox_25nt_0019726_0000001 + 2
..CCCTGTAAAAATTCTTTCT.................................................	fox_19nt_0055844_0000001 + 3
..CCCTGTAAAAATTCTTTCTTG...............................................	fox_21nt_0091926_0000001 + 3
..CCCTGTAAAAATTCTTTCTTGGC.............................................	fox_23nt_0011545_0000003 + 3
..CCCTGTAAAAATTCTTTCTTGGCA............................................	fox_24nt_0004625_0000007 + 3
..CCCTGTAAAAATTCTTTCTTGGCAC...........................................	fox_25nt_0047944_0000001 + 3
...CCTGTAAAAATTCTTTCT.................................................	fox_18nt_0008804_0000003 + 4
...CCTGTAAAAATTCTTTCTT................................................	fox_19nt_0066834_0000001 + 4
...CCTGTAAAAATTCTTTCTTG...............................................	fox_20nt_0061255_0000001 + 4
...CCTGTAAAAATTCTTTCTTGGC.............................................	fox_22nt_0001872_0000037 + 4
...CCTGTAAAAATTCTTTCTTGGCA............................................	fox_23nt_0000698_0000103 + 4
...CCTGTAAAAATTCTTTCTTGGCAC...........................................	fox_24nt_0003444_0000011 + 4
....CTGTAAAAATTCTTTCTTG...............................................	fox_19nt_0008623_0000004 + 5
....CTGTAAAAATTCTTTCTTGGC.............................................	fox_21nt_0002286_0000032 + 5
....CTGTAAAAATTCTTTCTTGGCA............................................	fox_22nt_0004945_0000011 + 5
....CTGTAAAAATTCTTTCTTGGCAC...........................................	fox_23nt_0019561_0000002 + 5
.....TGTAAAAATTCTTTCTTGG..............................................	fox_19nt_0005553_0000007 + 6
.....TGTAAAAATTCTTTCTTGGC.............................................	fox_20nt_0001608_0000042 + 6
.....TGTAAAAATTCTTTCTTGGCA............................................	fox_21nt_0014988_0000004 + 6
.....TGTAAAAATTCTTTCTTGGCAC...........................................	fox_22nt_0078530_0000001 + 6
......GTAAAAATTCTTTCTTGGC.............................................	fox_19nt_0009442_0000004 + 7
......GTAAAAATTCTTTCTTGG..............................................	fox_18nt_0040931_0000001 + 7
......GTAAAAATTCTTTCTTGGCA............................................	fox_20nt_0053906_0000001 + 7
.......TAAAAATTCTTTCTTGGC.............................................	fox_18nt_0005867_0000004 + 8
.......TAAAAATTCTTTCTTGGCA............................................	fox_19nt_0017049_0000002 + 8
.......TAAAAATTCTTTCTTGGCACG..........................................	fox_21nt_0017880_0000003 + 8
.......TAAAAATTCTTTCTTGGCACGC.........................................	fox_22nt_0026350_0000002 + 8
.......TAAAAATTCTTTCTTGGCACGCA........................................	fox_23nt_0007333_0000005 + 8
..........................................TGCTAGGAGCGGGATTTTCT........	fox_20nt_0107708_0000001 + 43
..........................................TGCTAGGAGCGGGATTTTCTA.......	fox_21nt_0045754_0000001 + 43
...........................................GCTAGGAGCGGGATTTTCT........	fox_19nt_0053419_0000001 + 44
...........................................GCTAGGAGCGGGATTTTCTACGGGC..	fox_25nt_0014129_0000002 + 44
............................................CTAGGAGCGGGATTTTCT........	fox_18nt_0009038_0000003 + 45
............................................CTAGGAGCGGGATTTTCTA.......	fox_19nt_0006277_0000006 + 45
.............................................TAGGAGCGGGATTTTCTA.......	fox_18nt_0002491_0000014 + 46
.............................................TAGGAGCGGGATTTTCTAC......	fox_19nt_0009672_0000004 + 46
.............................................TAGGAGCGGGATTTTCTACG.....	fox_20nt_0053172_0000001 + 46
.............................................TAGGAGCGGGATTTTCTACGG....	fox_21nt_0019237_0000003 + 46
.............................................TAGGAGCGGGATTTTCTACGGG...	fox_22nt_0086410_0000001 + 46
.............................................TAGGAGCGGGATTTTCTACGGGC..	fox_23nt_0012184_0000003 + 46
..............................................AGGAGCGGGATTTTCTACGG....	fox_20nt_0047575_0000001 + 47
...............................................GGAGCGGGATTTTCTACGG....	fox_19nt_0028080_0000001 + 48
...............................................GGAGCGGGATTTTCTACGGGC..	fox_21nt_0098577_0000001 + 48
.................................................AGCGGGATTTTCTACGGG...	fox_18nt_0032045_0000001 + 50
.................................................AGCGGGATTTTCTACGGGC..	fox_19nt_0047394_0000001 + 50
..................................................GCGGGATTTTCTACGGGC..	fox_18nt_0008668_0000003 + 51
..................................................GCGGGATTTTCTACGGGCCA	fox_20nt_0046414_0000001 + 51
...................................................CGGGATTTTCTACGGGCC.	fox_18nt_0004483_0000006 + 52
...................................................CGGGATTTTCTACGGGCCA	fox_19nt_0007196_0000005 + 52

>supercont2.19+_candidate_12_start_319584_stop_319881_length_298nt_hairpin_105_182_78nt_mappedmax_52 map_smallRNA_51
CGUGGCCGAGUGGUUAAGGCGAUGCCCUGCUAUCUCUUCGGAGACAUCAUAGGCAUUGUGUUCGCACGCGUAGGUUCG
((.((((..(((((.((.((((((((.((...((((....))))...))..)))))))).)).)).)))...)))))) (-29.10)
CGTGGCCGAGTGGTTAAG............................................................	fox_18nt_0042496_0000001 + 1
CGTGGCCGAGTGGTTAAGGC..........................................................	fox_20nt_0100696_0000001 + 1
..............................................TCATAGGCATTGTGTTCGCA............	fox_20nt_0048318_0000001 + 47
.................................................TAGGCATTGTGTTCGCACGC.........	fox_20nt_0018196_0000003 + 50
..................................................AGGCATTGTGTTCGCACG..........	fox_18nt_0012290_0000002 + 51
..................................................AGGCATTGTGTTCGCACGC.........	fox_19nt_0002832_0000017 + 51
..................................................AGGCATTGTGTTCGCACGCG........	fox_20nt_0012655_0000004 + 51
...................................................GGCATTGTGTTCGCACGC.........	fox_18nt_0001549_0000025 + 52
...................................................GGCATTGTGTTCGCACGCG........	fox_19nt_0002664_0000019 + 52
...................................................GGCATTGTGTTCGCACGCGT.......	fox_20nt_0010941_0000004 + 52
...................................................GGCATTGTGTTCGCACGCGTA......	fox_21nt_0007690_0000008 + 52
...................................................GGCATTGTGTTCGCACGCGTAG.....	fox_22nt_0005489_0000010 + 52
...................................................GGCATTGTGTTCGCACGCGTAGG....	fox_23nt_0009176_0000004 + 52
...................................................GGCATTGTGTTCGCACGCGTAGGT...	fox_24nt_0011548_0000002 + 52
....................................................GCATTGTGTTCGCACGCG........	fox_18nt_0007870_0000003 + 53
....................................................GCATTGTGTTCGCACGCGT.......	fox_19nt_0075507_0000001 + 53
....................................................GCATTGTGTTCGCACGCGTA......	fox_20nt_0016427_0000003 + 53
....................................................GCATTGTGTTCGCACGCGTAG.....	fox_21nt_0061105_0000001 + 53
....................................................GCATTGTGTTCGCACGCGTAGG....	fox_22nt_0014115_0000003 + 53
....................................................GCATTGTGTTCGCACGCGTAGGT...	fox_23nt_0014938_0000002 + 53
....................................................GCATTGTGTTCGCACGCGTAGGTTC.	fox_25nt_0010003_0000002 + 53
.....................................................CATTGTGTTCGCACGCGT.......	fox_18nt_0029581_0000001 + 54
.....................................................CATTGTGTTCGCACGCGTAG.....	fox_20nt_0015263_0000003 + 54
.....................................................CATTGTGTTCGCACGCGTAGG....	fox_21nt_0011200_0000005 + 54
.....................................................CATTGTGTTCGCACGCGTAGGT...	fox_22nt_0038712_0000001 + 54
.....................................................CATTGTGTTCGCACGCGTAGGTTC.	fox_24nt_0004347_0000008 + 54
.....................................................CATTGTGTTCGCACGCGTAGGTTCG	fox_25nt_0006307_0000004 + 54
......................................................ATTGTGTTCGCACGCGTAG.....	fox_19nt_0037440_0000001 + 55
......................................................ATTGTGTTCGCACGCGTAGG....	fox_20nt_0009357_0000005 + 55
......................................................ATTGTGTTCGCACGCGTAGGT...	fox_21nt_0020859_0000003 + 55
......................................................ATTGTGTTCGCACGCGTAGGTT..	fox_22nt_0064709_0000001 + 55
......................................................ATTGTGTTCGCACGCGTAGGTTC.	fox_23nt_0004947_0000008 + 55
......................................................ATTGTGTTCGCACGCGTAGGTTCG	fox_24nt_0004751_0000007 + 55
.......................................................TTGTGTTCGCACGCGTAG.....	fox_18nt_0006330_0000004 + 56
.......................................................TTGTGTTCGCACGCGTAGG....	fox_19nt_0008752_0000004 + 56
.......................................................TTGTGTTCGCACGCGTAGGT...	fox_20nt_0081238_0000001 + 56
.......................................................TTGTGTTCGCACGCGTAGGTTC.	fox_22nt_0010092_0000005 + 56
.......................................................TTGTGTTCGCACGCGTAGGTTCG	fox_23nt_0002269_0000023 + 56
........................................................TGTGTTCGCACGCGTAGG....	fox_18nt_0003806_0000008 + 57
........................................................TGTGTTCGCACGCGTAGGT...	fox_19nt_0002727_0000018 + 57
........................................................TGTGTTCGCACGCGTAGGTT..	fox_20nt_0007933_0000006 + 57
........................................................TGTGTTCGCACGCGTAGGTTC.	fox_21nt_0001848_0000041 + 57
........................................................TGTGTTCGCACGCGTAGGTTCG	fox_22nt_0002384_0000027 + 57
.........................................................GTGTTCGCACGCGTAGGTTC.	fox_20nt_0018689_0000002 + 58
.........................................................GTGTTCGCACGCGTAGGTTCG	fox_21nt_0040497_0000001 + 58
..........................................................TGTTCGCACGCGTAGGTT..	fox_18nt_0006559_0000004 + 59
..........................................................TGTTCGCACGCGTAGGTTC.	fox_19nt_0002480_0000021 + 59
..........................................................TGTTCGCACGCGTAGGTTCG	fox_20nt_0002812_0000022 + 59
...........................................................GTTCGCACGCGTAGGTTC.	fox_18nt_0002712_0000012 + 60
...........................................................GTTCGCACGCGTAGGTTCG	fox_19nt_0002160_0000024 + 60
............................................................TTCGCACGCGTAGGTTCG	fox_18nt_0000760_0000061 + 61

>supercont2.19+_candidate_14_start_363302_stop_363523_length_222nt_hairpin_25_110_86nt_mappedmax_1 map_smallRNA_1
ACGUAAAGCUUGAUUGAUUCCACCCACAAUCUCGUAUAGAGCUUGAAGAUGCAACUUCGUUAUCUCGAUCAACUCAGGACGUACGA
.((((...(((((((((((.......(((.(((.....))).))).((((((......).))))).)))))).)))))...)))). (-20.10)
....................................................................TCAACTCAGGACGTACGA	fox_18nt_0011883_0000002 + 69

>supercont2.19+_candidate_17_start_465524_stop_465741_length_218nt_hairpin_100_185_86nt_mappedmax_1 map_smallRNA_2
AGCAGCUUGGCGCAGUGGAAGCGCGGUAUGUGAUUUCGAAUCUUCUCAUCUCAAACAUGCACUAACAAUUCCCGUAGCCGGGCUCA
.(.((((((((...(.((((.....((((((......((......)).......))))))........)))))...))))))))). (-23.74)
AGCAGCTTGGCGCAGTGG....................................................................	fox_18nt_0036381_0000001 + 1
.............AGTGGAAGCGCGGTATGT.......................................................	fox_18nt_0029345_0000001 + 14

>supercont2.19+_candidate_32_start_778378_stop_778601_length_224nt_hairpin_57_126_70nt_mappedmax_11 map_smallRNA_13
UCUCCUGUAAAAACUUUUCCUUGGCACCCGCUGUUAGCGCUCUGCUAGGGUAGAGAAUUUUUGCAGGCUA
...((((((((((((((.((((((((..(((.....)))...)))))))).))))..))))))))))... (-28.20)
.......................................CTCTGCTAGGGTAGAGAATTTTTGCAGGC..	fox_29nt_0016476_0000001 + 40
........................................TCTGCTAGGGTAGAGAATTTTTGCAGGC..	fox_28nt_0019035_0000001 + 41
.........................................CTGCTAGGGTAGAGAATTTTTGCAGGC..	fox_27nt_0005715_0000004 + 42
..........................................TGCTAGGGTAGAGAATTTTTGCAGGC..	fox_26nt_0002525_0000015 + 43
..........................................TGCTAGGGTAGAGAATTTTTGCAGGCT.	fox_27nt_0005965_0000004 + 43
...........................................GCTAGGGTAGAGAATTTTTGCAGGC..	fox_25nt_0003604_0000009 + 44
...........................................GCTAGGGTAGAGAATTTTTGCAGGCT.	fox_26nt_0006884_0000003 + 44
............................................CTAGGGTAGAGAATTTTTGCAGGC..	fox_24nt_0014175_0000002 + 45
.............................................TAGGGTAGAGAATTTTTGCAG....	fox_21nt_0048327_0000001 + 46
.............................................TAGGGTAGAGAATTTTTGCAGGC..	fox_23nt_0013129_0000003 + 46
..................................................TAGAGAATTTTTGCAGGC..	fox_18nt_0016684_0000001 + 51
..................................................TAGAGAATTTTTGCAGGCT.	fox_19nt_0065569_0000001 + 51
..................................................TAGAGAATTTTTGCAGGCTA	fox_20nt_0097471_0000001 + 51

>supercont2.19+_candidate_38_start_779505_stop_779731_length_227nt_hairpin_2_115_114nt_mappedmax_2 map_smallRNA_2
UGGCUACGAGUAGGAAGGUGCCCUCGGGGGAAGGAGCUCGAGAGGCUCUCCGUUGAUGCGAGUGGACAUGGCGGGUAUUCUAGGAGGAGUCCAGCGCGACAGCAAUUGUAGAUA
...((((((...(((.((.(((((((((........)))))).))))))))((((.((((..(((((.(..(.((....))..)..).))))).)))).))))..))))))... (-38.70)
..............................................................................................CGCGACAGCAATTGTAGATA	fox_20nt_0059575_0000001 + 95
................................................................................................CGACAGCAATTGTAGATA	fox_18nt_0041578_0000001 + 97

>supercont2.19+_candidate_43_start_1053961_stop_1054258_length_298nt_hairpin_114_173_60nt_mappedmax_5 map_smallRNA_4
GUGGUUAAGGCGAUGCCCUGCUAUCUCUUAUGAGACAUCACAGGCAUUGUGUUCGCACGC
(((((.((.((((((((.((...((((....)))).....)))))))))).)).)).))) (-20.30)
........................................CAGGCATTGTGTTCGCACG.	fox_19nt_0079862_0000001 + 41
.........................................AGGCATTGTGTTCGCACG.	fox_18nt_0012290_0000002 + 42
.........................................AGGCATTGTGTTCGCACGC	fox_19nt_0002832_0000017 + 42
..........................................GGCATTGTGTTCGCACGC	fox_18nt_0001549_0000025 + 43

>supercont2.19+_candidate_46_start_1113802_stop_1114092_length_291nt_hairpin_105_219_115nt_mappedmax_1 map_smallRNA_5
GAUGGCCGAGUUGGUUAUGGCGCCAGGUUAAGGUUAACCUUAACACCAAUUUCCUGGUGGAGCAAUCCUCCUGGGUUCGAGUCCCAGUCUCAUCAAACAUUUCAUUUUUGGCCUC
...(((((((...(..(((..((((((((((((....)))))).........))))))(((....)))..(((((.......)))))..........)))..)...))))))).. (-37.10)
GATGGCCGAGTTGGTTATG................................................................................................	fox_19nt_0084637_0000001 + 1
.ATGGCCGAGTTGGTTATGGC..............................................................................................	fox_20nt_0070815_0000001 + 2
..TGGCCGAGTTGGTTATGGC..............................................................................................	fox_19nt_0085523_0000001 + 3
...GGCCGAGTTGGTTATGGC..............................................................................................	fox_18nt_0037213_0000001 + 4
.................................TTAACCTTAACACCAATT................................................................	fox_18nt_0001544_0000025 + 34

>supercont2.19+_candidate_50_start_1196068_stop_1196348_length_281nt_hairpin_198_252_55nt_mappedmax_1 map_smallRNA_1
UUGCGAGCGUUUGCGAGGCUUUCUUUUUUGCAUUUCUUUGUAAGCAAUCUCGCGU
..(((((.((((((((((....(......).....))))))))))...))))).. (-15.90)
TTGCGAGCGTTTGCGAGGC....................................	fox_19nt_0050501_0000001 + 1

>supercont2.19+_candidate_7_start_73278_stop_73547_length_270nt_hairpin_137_238_102nt_mappedmax_14 map_smallRNA_14
CGCUUGAGACCCGGGUUCAAUUCCCGGCGGGAGAGAUCCAGCCACCUGCGAUACGCGGGUUUCCUUUUUCCAUUUUUUGCCAAUUAGAACCCUUCUCAUGAA
....(((((...((((((((((...(((((((((((...((..(((((((...)))))))...))...))..))))))))))))).)))))).))))).... (-32.40)
CGCTTGAGACCCGGGTTC....................................................................................	fox_18nt_0004751_0000006 + 1
CGCTTGAGACCCGGGTTCA...................................................................................	fox_19nt_0004454_0000010 + 1
.GCTTGAGACCCGGGTTCA...................................................................................	fox_18nt_0003262_0000010 + 2
.GCTTGAGACCCGGGTTCAAT.................................................................................	fox_20nt_0066375_0000001 + 2
..CTTGAGACCCGGGTTCAAT.................................................................................	fox_19nt_0047292_0000001 + 3
..CTTGAGACCCGGGTTCAATT................................................................................	fox_20nt_0015689_0000003 + 3
....TGAGACCCGGGTTCAATT................................................................................	fox_18nt_0046958_0000001 + 5
....TGAGACCCGGGTTCAATTCC..............................................................................	fox_20nt_0017994_0000003 + 5
....TGAGACCCGGGTTCAATTCCC.............................................................................	fox_21nt_0001030_0000077 + 5
.....GAGACCCGGGTTCAATTCC..............................................................................	fox_19nt_0007643_0000005 + 6
.....GAGACCCGGGTTCAATTCCC.............................................................................	fox_20nt_0001013_0000071 + 6
......AGACCCGGGTTCAATTCC..............................................................................	fox_18nt_0004114_0000007 + 7
......AGACCCGGGTTCAATTCCC.............................................................................	fox_19nt_0004570_0000010 + 7
.......GACCCGGGTTCAATTCCC.............................................................................	fox_18nt_0007058_0000003 + 8

>supercont2.19-_candidate_13_start_539764_stop_539494_length_271nt_hairpin_158_250_93nt_mappedmax_1 map_smallRNA_1
CGUUCAGAAGAUGUUGCAGCACUAGGAUCAGUAUCACUGGGAUAGCCGAAGCUAUUCUCUUCUAUCGCUAGCUAGCAAUAUUUAACUACCACG
........((((((((((((..((((((.((.......((((((((....))))))))...))))).)))))).))))))))).......... (-22.50)
CGTTCAGAAGATGTTGCAGCA........................................................................	fox_21nt_0050976_0000001 + 1

>supercont2.19-_candidate_26_start_1154254_stop_1153971_length_284nt_hairpin_44_117_74nt_mappedmax_2 map_smallRNA_2
CCCAACUGCGGCUCCCGCACCAACCACAGCAUCAGUGCAUCUGUUGUUCUAAGUCGGUCUGGUGGUCUAGUGGU
.(((.(((.(((..(((.(((.((...((((.(((.....))).))))....)).))).)))..))))))))). (-22.20)
.......................................................GGTCTGGTGGTCTAGTGG.	fox_18nt_0002396_0000014 + 56
.......................................................GGTCTGGTGGTCTAGTGGT	fox_19nt_0002414_0000021 + 56

>supercont2.19-_candidate_27_start_1206925_stop_1206628_length_298nt_hairpin_96_188_93nt_mappedmax_64 map_smallRNA_63
CAGGACAACGUGGCCGAGUGGUUAAGGCGAUGCCCUGCUAUCUCUUCCGAGACAUCAUAGGCAUUGUGUUCGCACGCGUAGGUUCGAAUCCUG
(((((...((.((((..(((((.((.((((((((.((...((((....))))...))..)))))))).)).)).)))...))))))..))))) (-32.60)
...GACAACGTGGCCGAGTGG........................................................................	fox_18nt_0000774_0000060 + 4
...GACAACGTGGCCGAGTGGT.......................................................................	fox_19nt_0002273_0000023 + 4
........CGTGGCCGAGTGGTTAAG...................................................................	fox_18nt_0042496_0000001 + 9
........CGTGGCCGAGTGGTTAAGGC.................................................................	fox_20nt_0100696_0000001 + 9
......................................................TCATAGGCATTGTGTTCGCA...................	fox_20nt_0048318_0000001 + 55
.........................................................TAGGCATTGTGTTCGCACGC................	fox_20nt_0018196_0000003 + 58
..........................................................AGGCATTGTGTTCGCACG.................	fox_18nt_0012290_0000002 + 59
..........................................................AGGCATTGTGTTCGCACGC................	fox_19nt_0002832_0000017 + 59
..........................................................AGGCATTGTGTTCGCACGCG...............	fox_20nt_0012655_0000004 + 59
...........................................................GGCATTGTGTTCGCACGC................	fox_18nt_0001549_0000025 + 60
...........................................................GGCATTGTGTTCGCACGCG...............	fox_19nt_0002664_0000019 + 60
...........................................................GGCATTGTGTTCGCACGCGT..............	fox_20nt_0010941_0000004 + 60
...........................................................GGCATTGTGTTCGCACGCGTA.............	fox_21nt_0007690_0000008 + 60
...........................................................GGCATTGTGTTCGCACGCGTAG............	fox_22nt_0005489_0000010 + 60
...........................................................GGCATTGTGTTCGCACGCGTAGG...........	fox_23nt_0009176_0000004 + 60
...........................................................GGCATTGTGTTCGCACGCGTAGGT..........	fox_24nt_0011548_0000002 + 60
............................................................GCATTGTGTTCGCACGCG...............	fox_18nt_0007870_0000003 + 61
............................................................GCATTGTGTTCGCACGCGT..............	fox_19nt_0075507_0000001 + 61
............................................................GCATTGTGTTCGCACGCGTA.............	fox_20nt_0016427_0000003 + 61
............................................................GCATTGTGTTCGCACGCGTAG............	fox_21nt_0061105_0000001 + 61
............................................................GCATTGTGTTCGCACGCGTAGG...........	fox_22nt_0014115_0000003 + 61
............................................................GCATTGTGTTCGCACGCGTAGGT..........	fox_23nt_0014938_0000002 + 61
............................................................GCATTGTGTTCGCACGCGTAGGTTC........	fox_25nt_0010003_0000002 + 61
.............................................................CATTGTGTTCGCACGCGT..............	fox_18nt_0029581_0000001 + 62
.............................................................CATTGTGTTCGCACGCGTAG............	fox_20nt_0015263_0000003 + 62
.............................................................CATTGTGTTCGCACGCGTAGG...........	fox_21nt_0011200_0000005 + 62
.............................................................CATTGTGTTCGCACGCGTAGGT..........	fox_22nt_0038712_0000001 + 62
.............................................................CATTGTGTTCGCACGCGTAGGTTC........	fox_24nt_0004347_0000008 + 62
.............................................................CATTGTGTTCGCACGCGTAGGTTCG.......	fox_25nt_0006307_0000004 + 62
..............................................................ATTGTGTTCGCACGCGTAG............	fox_19nt_0037440_0000001 + 63
..............................................................ATTGTGTTCGCACGCGTAGG...........	fox_20nt_0009357_0000005 + 63
..............................................................ATTGTGTTCGCACGCGTAGGT..........	fox_21nt_0020859_0000003 + 63
..............................................................ATTGTGTTCGCACGCGTAGGTT.........	fox_22nt_0064709_0000001 + 63
..............................................................ATTGTGTTCGCACGCGTAGGTTC........	fox_23nt_0004947_0000008 + 63
..............................................................ATTGTGTTCGCACGCGTAGGTTCG.......	fox_24nt_0004751_0000007 + 63
...............................................................TTGTGTTCGCACGCGTAG............	fox_18nt_0006330_0000004 + 64
...............................................................TTGTGTTCGCACGCGTAGG...........	fox_19nt_0008752_0000004 + 64
...............................................................TTGTGTTCGCACGCGTAGGT..........	fox_20nt_0081238_0000001 + 64
...............................................................TTGTGTTCGCACGCGTAGGTTC........	fox_22nt_0010092_0000005 + 64
...............................................................TTGTGTTCGCACGCGTAGGTTCG.......	fox_23nt_0002269_0000023 + 64
................................................................TGTGTTCGCACGCGTAGG...........	fox_18nt_0003806_0000008 + 65
................................................................TGTGTTCGCACGCGTAGGT..........	fox_19nt_0002727_0000018 + 65
................................................................TGTGTTCGCACGCGTAGGTT.........	fox_20nt_0007933_0000006 + 65
................................................................TGTGTTCGCACGCGTAGGTTC........	fox_21nt_0001848_0000041 + 65
................................................................TGTGTTCGCACGCGTAGGTTCG.......	fox_22nt_0002384_0000027 + 65
.................................................................GTGTTCGCACGCGTAGGTTC........	fox_20nt_0018689_0000002 + 66
.................................................................GTGTTCGCACGCGTAGGTTCG.......	fox_21nt_0040497_0000001 + 66
..................................................................TGTTCGCACGCGTAGGTT.........	fox_18nt_0006559_0000004 + 67
..................................................................TGTTCGCACGCGTAGGTTC........	fox_19nt_0002480_0000021 + 67
..................................................................TGTTCGCACGCGTAGGTTCG.......	fox_20nt_0002812_0000022 + 67
...................................................................GTTCGCACGCGTAGGTTC........	fox_18nt_0002712_0000012 + 68
...................................................................GTTCGCACGCGTAGGTTCG.......	fox_19nt_0002160_0000024 + 68
....................................................................TTCGCACGCGTAGGTTCG.......	fox_18nt_0000760_0000061 + 69
.......................................................................GCACGCGTAGGTTCGAATC...	fox_19nt_0010264_0000003 + 72
.......................................................................GCACGCGTAGGTTCGAATCC..	fox_20nt_0019657_0000002 + 72
........................................................................CACGCGTAGGTTCGAATC...	fox_18nt_0005241_0000005 + 73
........................................................................CACGCGTAGGTTCGAATCC..	fox_19nt_0005347_0000008 + 73
........................................................................CACGCGTAGGTTCGAATCCT.	fox_20nt_0006934_0000008 + 73
.........................................................................ACGCGTAGGTTCGAATCC..	fox_18nt_0004662_0000006 + 74
.........................................................................ACGCGTAGGTTCGAATCCT.	fox_19nt_0005103_0000008 + 74
.........................................................................ACGCGTAGGTTCGAATCCTG	fox_20nt_0005945_0000009 + 74
..........................................................................CGCGTAGGTTCGAATCCT.	fox_18nt_0004533_0000006 + 75
..........................................................................CGCGTAGGTTCGAATCCTG	fox_19nt_0009883_0000004 + 75

>supercont2.19-_candidate_33_start_1277362_stop_1277082_length_281nt_hairpin_99_279_181nt_mappedmax_2 map_smallRNA_39
GGCGCAGUGGCAGAGUGGUCUAAUGCGAUAGACUAGAAAUCUAUUCUCCUCGGAGGCGUCUGUUCGAAUCAGGCCUGCGUCGUUUGGAUGUCUUUUUUGCAGUGUCUUGGUAUGCAUUUAAUACCAUGCUUUUAUUUUUUGGUCUUGUAUUGCAAUGAAUUGACUCUAUGAAGCUUGCUCC
((.(((((..((.((.((((...((((((((((((((((............(((((((((((..(((..((....))..)))..)))))))))))...(((......((((((.......)))))))))......))))))))))...)))))).......)))))).))..)).))).)) (-49.00)
GGCGCAGTGGCAGAGTGG...................................................................................................................................................................	fox_18nt_0002145_0000017 + 1
GGCGCAGTGGCAGAGTGGT..................................................................................................................................................................	fox_19nt_0002470_0000021 + 1
GGCGCAGTGGCAGAGTGGTC.................................................................................................................................................................	fox_20nt_0005245_0000011 + 1
..CGCAGTGGCAGAGTGGTCTAA..............................................................................................................................................................	fox_21nt_0015537_0000003 + 3
.....AGTGGCAGAGTGGTCTAA..............................................................................................................................................................	fox_18nt_0026291_0000001 + 6
...................................GAAATCTATTCTCCTCGGAGG.............................................................................................................................	fox_21nt_0088559_0000001 + 36
....................................AAATCTATTCTCCTCGGA...............................................................................................................................	fox_18nt_0051252_0000001 + 37
....................................AAATCTATTCTCCTCGGAG..............................................................................................................................	fox_19nt_0040291_0000001 + 37
....................................AAATCTATTCTCCTCGGAGGC............................................................................................................................	fox_21nt_0026104_0000002 + 37
.................................................TCGGAGGCGTCTGTTCGA..................................................................................................................	fox_18nt_0010924_0000002 + 50
.................................................TCGGAGGCGTCTGTTCGAAT................................................................................................................	fox_20nt_0013755_0000003 + 50
..................................................CGGAGGCGTCTGTTCGAA.................................................................................................................	fox_18nt_0007558_0000003 + 51
..................................................CGGAGGCGTCTGTTCGAAT................................................................................................................	fox_19nt_0046930_0000001 + 51
...................................................GGAGGCGTCTGTTCGAATC...............................................................................................................	fox_19nt_0010974_0000003 + 52
...................................................GGAGGCGTCTGTTCGAATCAG.............................................................................................................	fox_21nt_0019091_0000003 + 52
...................................................GGAGGCGTCTGTTCGAATCAGG............................................................................................................	fox_22nt_0088822_0000001 + 52
...................................................GGAGGCGTCTGTTCGAATCAGGC...........................................................................................................	fox_23nt_0001772_0000033 + 52
....................................................GAGGCGTCTGTTCGAATCA..............................................................................................................	fox_19nt_0009170_0000004 + 53
....................................................GAGGCGTCTGTTCGAATC...............................................................................................................	fox_18nt_0038341_0000001 + 53
....................................................GAGGCGTCTGTTCGAATCAGG............................................................................................................	fox_21nt_0033740_0000002 + 53
....................................................GAGGCGTCTGTTCGAATCAGGC...........................................................................................................	fox_22nt_0001203_0000060 + 53
....................................................GAGGCGTCTGTTCGAATCAGGCC..........................................................................................................	fox_23nt_0016418_0000002 + 53
.....................................................AGGCGTCTGTTCGAATCA..............................................................................................................	fox_18nt_0010494_0000002 + 54
.....................................................AGGCGTCTGTTCGAATCAG.............................................................................................................	fox_19nt_0019030_0000002 + 54
.....................................................AGGCGTCTGTTCGAATCAGG............................................................................................................	fox_20nt_0008518_0000006 + 54
.....................................................AGGCGTCTGTTCGAATCAGGC...........................................................................................................	fox_21nt_0000621_0000137 + 54
.....................................................AGGCGTCTGTTCGAATCAGGCC..........................................................................................................	fox_22nt_0012563_0000004 + 54
......................................................GGCGTCTGTTCGAATCAGGC...........................................................................................................	fox_20nt_0006480_0000008 + 55
.......................................................GCGTCTGTTCGAATCAGGC...........................................................................................................	fox_19nt_0004437_0000010 + 56
.......................................................GCGTCTGTTCGAATCAGGCC..........................................................................................................	fox_20nt_0085688_0000001 + 56
........................................................CGTCTGTTCGAATCAGGC...........................................................................................................	fox_18nt_0002494_0000014 + 57
........................................................CGTCTGTTCGAATCAGGCC..........................................................................................................	fox_19nt_0055074_0000001 + 57
.........................................................GTCTGTTCGAATCAGGCC..........................................................................................................	fox_18nt_0016369_0000001 + 58
.............................................................GTTCGAATCAGGCCTGCGTC....................................................................................................	fox_20nt_0024654_0000002 + 62
.............................................................GTTCGAATCAGGCCTGCGTCG...................................................................................................	fox_21nt_0025087_0000002 + 62
..............................................................TTCGAATCAGGCCTGCGTC....................................................................................................	fox_19nt_0065674_0000001 + 63
..............................................................TTCGAATCAGGCCTGCGTCG...................................................................................................	fox_20nt_0104065_0000001 + 63
...............................................................TCGAATCAGGCCTGCGTCG...................................................................................................	fox_19nt_0018419_0000002 + 64
................................................................CGAATCAGGCCTGCGTCG...................................................................................................	fox_18nt_0025033_0000001 + 65

>supercont2.19-_candidate_3_start_11040_stop_10823_length_218nt_hairpin_84_201_118nt_mappedmax_3 map_smallRNA_3
CUUGUGGUUAUGUACUCAAGGAUUUCUGGGAGGCAGGUUGUGUAGUUGAAAGAACAGUGACUCUAGGUUAAAUAGUUGAAGAGUAGACUUCCAGUUAUAGUUAAGUAUAGAUUAUAGG
(((((((((.((((((.((..((..(((((((....(((.(.........).)))....(((((...((((....)))))))))...)))))))..))..)).))))))))))))))) (-26.00)
..........TGTACTCAAGGATTTCTGGGAG......................................................................................	fox_22nt_0064324_0000001 + 11
...............................................................................................TATAGTTAAGTATAGATTATAGG	fox_23nt_0062769_0000001 + 96
.................................................................................................TAGTTAAGTATAGATTATAGG	fox_21nt_0060498_0000001 + 98

>supercont2.2+_candidate_112_start_1073120_stop_1073343_length_224nt_hairpin_1_125_125nt_mappedmax_5 map_smallRNA_5
GCUUCGGGGUGAUCAGCGUGUCGAGACUUGGACUGACUCUUGAUAUUUGCAGACUUUUGGGGCCCUGUCUCCAACUUCGGUAUCCCUCUCGCGGCCAUCAUGGACACGCAGAAGAGCCCUGAAUU
..((((((((..((.(((((((.(....(((.(((......((((((....((...((((((......))))))..)))))))).......))))))...).))))))).))...)))))))).. (-40.82)
...................................................................................................ATGGACACGCAGAAGAGCCCTG....	fox_22nt_0016997_0000003 + 100
....................................................................................................TGGACACGCAGAAGAGCCCT.....	fox_20nt_0109879_0000001 + 101
....................................................................................................TGGACACGCAGAAGAGCCCTG....	fox_21nt_0019939_0000003 + 101
....................................................................................................TGGACACGCAGAAGAGCCCTGA...	fox_22nt_0017237_0000003 + 101
...........................................................................................................GCAGAAGAGCCCTGAATT	fox_18nt_0039039_0000001 + 108

>supercont2.2+_candidate_129_start_1090934_stop_1091149_length_216nt_hairpin_97_187_91nt_mappedmax_2 map_smallRNA_2
CUAGCUGGGACAACUGUAUGAACGUGGCGUGGUGCAAGUGCGUAUAUCCUUCGCUACUUACAGGCCUUGUUUGCUAACUUGACCCAGGUGG
(((.(((((.(((...((((((((.(((.((....(((((((.........))).)))).)).))).)))))).))..))).))))).))) (-29.10)
CTAGCTGGGACAACTGTATG.......................................................................	fox_20nt_0081179_0000001 + 1
..AGCTGGGACAACTGTATG.......................................................................	fox_18nt_0035782_0000001 + 3

>supercont2.2+_candidate_132_start_1110545_stop_1110759_length_215nt_hairpin_24_112_89nt_mappedmax_1 map_smallRNA_1
CAUGACUGUAUCACAGUCUUCAAAGGCCAAACCGGCCUCCAAAGCCAGCAAUGGCAAGCCAAAGACAAAGACGCAGAUGCAUCGUCGUU
.(((((((((((...(((((...(((((.....))))).....((((....))))............)))))...))))))..))))). (-30.70)
......................................................................ACGCAGATGCATCGTCGTT	fox_19nt_0085557_0000001 + 71

>supercont2.2+_candidate_145_start_1164394_stop_1164699_length_306nt_hairpin_51_181_131nt_mappedmax_7 map_smallRNA_7
UGUCGUUAUUCAUGUUUGGGCACACGAUGCCUUGAGCUAUACUUCGAAGCGAUCGUUCAUGCCCUUUAUUUUAGGGCACCUGUUAUCCUCUCAACAAUAAGGCACUGUGAGCCCAGGGCAUUACUGAGAUA
((((.(((.(.((((((((((.((((.(((((((.(((.........))).........((((((.......))))))...................))))))).)))).))))).))))).).))))))) (-39.70)
...............................................................................................AATAAGGCACTGTGAGCCCAGGGC............	fox_24nt_0039604_0000001 + 96
...............................................................................................AATAAGGCACTGTGAGCCCAGGGCAT..........	fox_26nt_0045694_0000001 + 96
................................................................................................ATAAGGCACTGTGAGCCCAGGGC............	fox_23nt_0011124_0000003 + 97
.................................................................................................TAAGGCACTGTGAGCCCAGGGC............	fox_22nt_0090595_0000001 + 98
..................................................................................................AAGGCACTGTGAGCCCAGGGCA...........	fox_22nt_0084374_0000001 + 99
...................................................................................................AGGCACTGTGAGCCCAGGGC............	fox_20nt_0082197_0000001 + 100
......................................................................................................CACTGTGAGCCCAGGGCATTACTGAGATA	fox_29nt_0050847_0000001 + 103

>supercont2.2+_candidate_146_start_1164592_stop_1164795_length_204nt_hairpin_8_197_190nt_mappedmax_7 map_smallRNA_7
GCUUGUACUACUAGUUUCAUAUUUAUGGUCAUGAUAUACCCAGUCCGGACCAUGCACAGCCUGAUCUGUUGAUAAUGGGCCAGGGGCUUCACAGGACAAAAGACAGACCAGGGUGUUGGCAAGAUGUGGGCACGACAAUGAAGUUGAUGAGAAGAGGUGCAGACUAUAGAGUGCAAGCAGUCUUACAAGA
.((((((..(((.(((((((.(((((((((.((...(((((.(((((.(.(.((((((.((((.((((((.....((((((...))))...))........)))))).)))).)))..))).).).))))).((((......)))).......).)))))))))))))))))).)))))))..)))))). (-57.92)
...............................................................................................................................................................CAGACTATAGAGTGCAAGCA...........	fox_20nt_0095098_0000001 + 160
...............................................................................................................................................................CAGACTATAGAGTGCAAGCAGTC........	fox_23nt_0043852_0000001 + 160
...............................................................................................................................................................CAGACTATAGAGTGCAAGCAGTCTTAC....	fox_27nt_0012344_0000002 + 160
................................................................................................................................................................AGACTATAGAGTGCAAGCAG..........	fox_20nt_0036973_0000001 + 161
................................................................................................................................................................AGACTATAGAGTGCAAGCAGTCTTAC....	fox_26nt_0047952_0000001 + 161
................................................................................................................................................................AGACTATAGAGTGCAAGCAGTCTTACAAG.	fox_29nt_0011335_0000002 + 161
.........................................................................................................................................................................AGTGCAAGCAGTCTTACAAGA	fox_21nt_0079673_0000001 + 170

>supercont2.2+_candidate_149_start_1182610_stop_1182811_length_202nt_hairpin_27_89_63nt_mappedmax_1 map_smallRNA_1
CAGCACCAUCGUCGCUUAAGCGAACACAUGACGAAGAAUGGCCGCAUUGAGUUGGUGGUGAUG
...((((((((..(((((((((....(((........)))..))).))))))))))))))... (-20.50)
CAGCACCATCGTCGCTTAAGCG.........................................	fox_22nt_0030978_0000001 + 1

>supercont2.2+_candidate_14_start_128053_stop_128274_length_222nt_hairpin_59_193_135nt_mappedmax_1 map_smallRNA_1
ACCGGGGUAGACGUCACGCAAUGGGUCUGCCAGUCCGUGGUCAACGAACAAGGACACAGACGGCGACGGCCAACAGACUCAACAGGGUGGAACGACGAGGUUAAGCGCAUCAUUGGAAGAGUGGGUUACCUGGGU
(((.((((.(((.((((.(..((((((((...((((.((.........)).))))......(((....)))..))))))))...(.((..(((......)))..)).)..........).))))))))))).))) (-43.40)
ACCGGGGTAGACGTCACGC....................................................................................................................	fox_19nt_0076421_0000001 + 1

>supercont2.2+_candidate_150_start_1232368_stop_1232670_length_303nt_hairpin_16_203_188nt_mappedmax_8 map_smallRNA_21
UGACAGCUUGGUGAUUCUAGCAAGCUCGUCUUGGACAUGUGUCAAGUUAUUCAUUUGACAACUUUUCGAGUAAUAACGCAUCAAGGCAAGAUGGCCGAGCGGUCUAAGGCGCUGUGUUCAGGUUCGAUUAGAACUAGCAACGAUUCGCAGUCUCGAAAGGGGCCUGGGUUCGAAUCCCAGUCUUGUCA
.(((((.((((.(((((.(((..((.((((((((((...((((((((.....))))))))................(((.((..(((......))))))))))))))))))...(((((.(((((.....))))).).))))....)).(((((....)))))....))).)))))))))..))))). (-62.10)
.................................................................................................AGCGGTCTAAGGCGCTGTG........................................................................	fox_19nt_0006988_0000006 + 98
..................................................................................................GCGGTCTAAGGCGCTGTG........................................................................	fox_18nt_0001489_0000026 + 99
..................................................................................................GCGGTCTAAGGCGCTGTGT.......................................................................	fox_19nt_0049492_0000001 + 99
...................................................................................................CGGTCTAAGGCGCTGTGT.......................................................................	fox_18nt_0001806_0000021 + 100
...................................................................................................CGGTCTAAGGCGCTGTGTT......................................................................	fox_19nt_0002427_0000021 + 100
...................................................................................................CGGTCTAAGGCGCTGTGTTC.....................................................................	fox_20nt_0003729_0000016 + 100
....................................................................................................GGTCTAAGGCGCTGTGTT......................................................................	fox_18nt_0005136_0000005 + 101
....................................................................................................GGTCTAAGGCGCTGTGTTC.....................................................................	fox_19nt_0006634_0000006 + 101
.....................................................................................................GTCTAAGGCGCTGTGTTCA....................................................................	fox_19nt_0005854_0000007 + 102
.....................................................................................................GTCTAAGGCGCTGTGTTC.....................................................................	fox_18nt_0042477_0000001 + 102
......................................................................................................TCTAAGGCGCTGTGTTCA....................................................................	fox_18nt_0003412_0000009 + 103
......................................................................................................TCTAAGGCGCTGTGTTCAG...................................................................	fox_19nt_0008894_0000004 + 103
.......................................................................................................CTAAGGCGCTGTGTTCAGGT.................................................................	fox_20nt_0014265_0000003 + 104
.....................................................................................................................................................................GGGTTCGAATCCCAGTCTTGTC.	fox_22nt_0054349_0000001 + 166
......................................................................................................................................................................GGTTCGAATCCCAGTCTTGTC.	fox_21nt_0023822_0000002 + 167
.......................................................................................................................................................................GTTCGAATCCCAGTCTTGTC.	fox_20nt_0026281_0000002 + 168
.......................................................................................................................................................................GTTCGAATCCCAGTCTTGTCA	fox_21nt_0104977_0000001 + 168
........................................................................................................................................................................TTCGAATCCCAGTCTTGTCA	fox_20nt_0011409_0000004 + 169
........................................................................................................................................................................TTCGAATCCCAGTCTTGTC.	fox_19nt_0078967_0000001 + 169
.........................................................................................................................................................................TCGAATCCCAGTCTTGTCA	fox_19nt_0074497_0000001 + 170
..........................................................................................................................................................................CGAATCCCAGTCTTGTCA	fox_18nt_0046133_0000001 + 171

>supercont2.2+_candidate_189_start_1663061_stop_1663272_length_212nt_hairpin_20_112_93nt_mappedmax_4 map_smallRNA_4
UUUCAGACAUGAUACGAUUUACGAGCGGAAUCACGAAUAAUCGGCUUGAUGUCGAAACCUGACUUCUUUUCGAAAGAGUAUCGAGCACUGAAC
.(((((.(.((((((..(((.((((.(((((((.(.....(((((.....)))))..).))).)))).)))))))..)))))).)..))))). (-24.10)
.TTCAGACATGATACGATTTACGAGC...................................................................	fox_25nt_0033118_0000001 + 2
..................TTACGAGCGGAATCACGA.........................................................	fox_18nt_0044187_0000001 + 19
........................................................................AAAGAGTATCGAGCACTGAAC	fox_21nt_0072867_0000001 + 73
..........................................................................AGAGTATCGAGCACTGAAC	fox_19nt_0084830_0000001 + 75

>supercont2.2+_candidate_196_start_1718330_stop_1718548_length_219nt_hairpin_100_161_62nt_mappedmax_1 map_smallRNA_1
ACAGAUCGAGAUGGACCGGCGGAGGGACUUAUUGACGUCAGACCGGACUCCUCUCGGUCUGG
.((((((((((.((((((((.((.(..........).)).).))))..))))))))))))). (-28.80)
ACAGATCGAGATGGACCGGC..........................................	fox_20nt_0010150_0000005 + 1

>supercont2.2+_candidate_19_start_161058_stop_161371_length_314nt_hairpin_123_256_134nt_mappedmax_3 map_smallRNA_3
AGCACAAGAACGACUGGCGAAGCUUGAACAAGAACACCAGAAGAAUAGAGACUACCAAUCUUACUAUGGAAACGAAUCGUCGCCUAGACGGCGGUUUACACUGACAUCCAAGCUGCGUCGUCGCUCUUCUAGCG
.((..((((.((((.((((.((((((..........(((..((...(((.........)))..)).)))....(((((((((......)))))))))...........)))))).)))))))).))))...)). (-38.50)
AGCACAAGAACGACTGGCG...................................................................................................................	fox_19nt_0062785_0000001 + 1
..CACAAGAACGACTGGCGA..................................................................................................................	fox_18nt_0039744_0000001 + 3
....CAAGAACGACTGGCGAAGC...............................................................................................................	fox_19nt_0064356_0000001 + 5

>supercont2.2+_candidate_215_start_1838488_stop_1838854_length_367nt_hairpin_14_309_296nt_mappedmax_2 map_smallRNA_2
CGUGAUGGAUGAGUUUGCCAACGACAACGACCACCAUAAAAACUUGGCGGCUUGCCGUUCUUUACACUCGUUGUAAUCAUCCUGUGCGGCUGGAAGCUGGAACUGAAGGCUCGCCGGGACGACGGUAUCACUUGAGAGCAGUGGGAGAUGAAGGUGAAGGCGUUUGUCUUUUUCUUCUUCCAUAUUCUUGUGUUUACUCUGAUUCUUUGUCUGUCGUUUGCCUGUUGCUGGAUUUUUAGAGAUGUCGAGUACAGGAGUGUGCCGGUCACAGUCAUUGACAGACGCUCAUCCUCACA
.((((.(((((((((((.(((.(((...((((..((((....(((((((((((.(.(((((.....((.((((((.........)))))).)).....))))).).)))).)))))))(((((.(((.(((..(((((..((((((((.(((...((((((....))))))))).)))))))).))))))))..)))...(((.....))).)))))...(((((.(((.(((.((....)).))).))))))))..))))..))))...))).))).)))..)))))))))))). (-98.60)
CGTGATGGATGAGTTTGC......................................................................................................................................................................................................................................................................................	fox_18nt_0023518_0000001 + 1
....................................................................................................................................TGAGAGCAGTGGGAGATG..................................................................................................................................................	fox_18nt_0023566_0000001 + 133

>supercont2.2+_candidate_237_start_2034915_stop_2035134_length_220nt_hairpin_72_188_117nt_mappedmax_4 map_smallRNA_4
AAAGAAUUGGACUGAUGUGGGUAUGAUUUCGUGUAGGGACAAAGGACGGGUCCAAGUUGAAUCCUAGGAGAUAUUUUCGCCCCUAUGCAAUCUUGCUCCGUCGCUGUUCGGUCCUUU
((((.((((((((((((.(((((.((((..((((((((.(...(((....)))........((....)).........).)))))))))))).))))))))))..))))))).)))) (-34.90)
AAAGAATTGGACTGATGTGGG................................................................................................	fox_21nt_0050933_0000001 + 1
...................GGTATGATTTCGTGTAGGGACA............................................................................	fox_22nt_0090602_0000001 + 20
.....................TATGATTTCGTGTAGGGACA............................................................................	fox_20nt_0019152_0000002 + 22
...................................................................................TATGCAATCTTGCTCCGTCGC.............	fox_21nt_0094260_0000001 + 84

>supercont2.2+_candidate_258_start_2249393_stop_2249615_length_223nt_hairpin_37_91_55nt_mappedmax_1 map_smallRNA_1
CACCUGGAUCGGCGACCCUGCCCGUGUCAUCAUGUGCAAGGCUGUCAUCCAGGAG
..(((((((.((((.((.(((.((((....)))).))).)).))))))))))).. (-26.50)
...................................GCAAGGCTGTCATCCAGGAG	fox_20nt_0060412_0000001 + 36

>supercont2.2+_candidate_265_start_2336000_stop_2336272_length_273nt_hairpin_108_254_147nt_mappedmax_1 map_smallRNA_1
AGUGGACUGAGGAAGCAUCUGUAUAUACAUGGUUCCUAUUCCUUGAAUAAGGCUGUAUUUCUAGGCAUUAUGCCGGGGAGACUACUGACUAGGAAUGGUUACGUAUGGUAGAUCAAAAGAAGAAACUGUUGUUUUUUACAUGCCAUU
(((((..((((((((((...((.....((((((..((((((((......((...((.(((((.(((.....))).)))))))..))....))))))))..)).)))).....((....))....))...)))))))).))..))))) (-35.30)
AGTGGACTGAGGAAGCATC................................................................................................................................	fox_19nt_0075427_0000001 + 1

>supercont2.2+_candidate_273_start_2368210_stop_2368506_length_297nt_hairpin_109_186_78nt_mappedmax_3 map_smallRNA_3
GUGUAGUGGUUUAUCACGCAGCUCUUAUAUGUCCAAGACUUCAUGGAGGUAUGCUGAGGUCGCGAGUUCAAUCCUCGC
(((.((.((((...(.((((.(((.(((((.((((.(....).)))).)))))..))).).))).)...))))))))) (-21.40)
GTGTAGTGGTTTATCACG............................................................	fox_18nt_0006853_0000004 + 1
.TGTAGTGGTTTATCACGC...........................................................	fox_18nt_0039818_0000001 + 2
......TGGTTTATCACGCAGCTC......................................................	fox_18nt_0004291_0000007 + 7

>supercont2.2+_candidate_284_start_2641590_stop_2641808_length_219nt_hairpin_90_166_77nt_mappedmax_2 map_smallRNA_2
UUGCUGCCGUCCGCAAGGGAAUUCUGAAGCGUAAGUCAAAAGGUUUUCUUAUAAAUUCUCUUGCUAACAGUCUGUAG
.(((.((.((..(((((((((((...(((...((..(....)..)).)))...)))))))))))..)).))..))). (-18.90)
..........CCGCAAGGGAATTCTGAAGC...............................................	fox_20nt_0013020_0000004 + 11
........................................................TCTCTTGCTAACAGTCTGTAG	fox_21nt_0024270_0000002 + 57

>supercont2.2+_candidate_285_start_2690824_stop_2691042_length_219nt_hairpin_51_196_146nt_mappedmax_1 map_smallRNA_1
AUGGCAAGGAGUGGUAUGCUGAGGGACCUCAAAGUGAUCAAAUGAAGGCUCUGAACAAGAAGUUUGGCAUGCUCCACGGUAUCUCAUCCUUGUUCAACCUCAUCACUUUUGCAGCUGCUGUUGGUUACGGCUUCACUCUUGGUGGU
((.((.((((((((...((((...((((..(((((((.....(((.((...((((((((.....(((.(((((....))))).)))..)))))))).)))))))))))).((....))....)))).)))).)))))))).)).)) (-42.80)
ATGGCAAGGAGTGGTATGC...............................................................................................................................	fox_19nt_0035822_0000001 + 1

>supercont2.2+_candidate_289_start_2703181_stop_2703397_length_217nt_hairpin_106_201_96nt_mappedmax_1 map_smallRNA_1
ACGAGGAUUGGGCUACCAUGGGGGCUGCUGCUCUUCGAGCCGAGUCUUACCCUAACCAGGCGGCAGCUCAGACAGACCAUGGCUUCCGAUCCUCUU
..((((((((((...(((((((((((((((((.....((............)).....))))))))))).......))))))..)))))))))).. (-41.51)
ACGAGGATTGGGCTACCA..............................................................................	fox_18nt_0045949_0000001 + 1

>supercont2.2+_candidate_290_start_2703464_stop_2703700_length_237nt_hairpin_96_165_70nt_mappedmax_5 map_smallRNA_4
CGUUUUUUGGGCUUUCGAGAUUUCUGAAGGCGAUCGAUUCGGGGCAGGGGCUGGUUGGCUUAAGGAGAGG
..(((((((((((..(.((.(..(((....(((.....)))...)))..))).)..)))))))))))... (-21.40)
CGTTTTTTGGGCTTTCGA....................................................	fox_18nt_0038860_0000001 + 1
....TTTTGGGCTTTCGAGATTTCTG............................................	fox_22nt_0024181_0000002 + 5
.......TGGGCTTTCGAGATTTCTG............................................	fox_19nt_0068885_0000001 + 8
................................................GGCTGGTTGGCTTAAGGAG...	fox_19nt_0084623_0000001 + 49

>supercont2.2+_candidate_293_start_2704067_stop_2704290_length_224nt_hairpin_100_207_108nt_mappedmax_4 map_smallRNA_3
UGUGGAGGAUUAUGACGACGAUUAUUUUAUACCAUUUGUGGGCAGUUGCAGCCAGUUUUUUGGGCCUCGUUUUGCAACUUUCUCGAAUCUUUGUUUAAUCAACUUUUA
...((..(((((.(((((.((((........(((....)))..((((((((((((....))))........))))))))......)))).))))))))))..)).... (-21.70)
TGTGGAGGATTATGACGAC.........................................................................................	fox_19nt_0064792_0000001 + 1
TGTGGAGGATTATGACGACGA.......................................................................................	fox_21nt_0073528_0000001 + 1
TGTGGAGGATTATGACGACGATT.....................................................................................	fox_23nt_0023661_0000002 + 1

>supercont2.2+_candidate_315_start_2873830_stop_2874043_length_214nt_hairpin_62_117_56nt_mappedmax_1 map_smallRNA_1
CCCAGCUUUUAGACCAGAAUGGCCUGGAUUGGGACCCUUUUGGAUUAAGUGCUAGC
...(((.(((((.((((((.(((((.....))).)).)))))).))))).)))... (-17.70)
......................................TTTGGATTAAGTGCTAGC	fox_18nt_0039800_0000001 + 39

>supercont2.2+_candidate_316_start_2874281_stop_2874559_length_279nt_hairpin_54_115_62nt_mappedmax_3 map_smallRNA_3
GCCUAUAGUCAUACCCAUUCUCCAUGUAAUAUCGCGCUGGGGUUGAGUAGGGCUAUGGUAGC
(((.((((((.(((.((..((((((((......))).))))).)).))).)))))))))... (-20.40)
GCCTATAGTCATACCCATTCTCCA......................................	fox_24nt_0031455_0000001 + 1
......................................GGGGTTGAGTAGGGCTATGGT...	fox_21nt_0098592_0000001 + 39
...........................................TGAGTAGGGCTATGGTAGC	fox_19nt_0030192_0000001 + 44

>supercont2.2+_candidate_328_start_3114788_stop_3115018_length_231nt_hairpin_122_227_106nt_mappedmax_6 map_smallRNA_1
GCAGUCCUGGGUGUCAUCGAAACGACCUAGCUCCGUGGGGUGAUCAUAAGCUAUAUGCCGAGAUCACCUCACCGCGCAUGGUAGUUUGGAUGGUGCUCAGGGCCAC
...((((((((..(((((.((((.(((..((.(.(((((((((((.(..((.....))..)))))))))))).).))..))).)))).)))))..))))))))... (-56.30)
....TCCTGGGTGTCATCGAAACGACC...............................................................................	fox_23nt_0019329_0000002 + 5

>supercont2.2+_candidate_329_start_3114900_stop_3115127_length_228nt_hairpin_0_227_228nt_mappedmax_17 map_smallRNA_12
CAUUGACGGCGCAGUCCUGGGUGUCAUCGAAACGACCUAGCUCCGUGGGGUGAUCAUAAGCUAUAUGCCGAGAUCACCUCACCGCGCAUGGUAGUUUGGAUGGUGCUCAGGGCCACGCCGUCAAUGACCCUGGAUUCAUCUGAAUCAUCGUACAUGAUCAACGUCAGCUCAGUUUUCGACCCUAAUACCAACGUUGAGUCUCACCGUGUGCUCCAGAGCACCAUCAAA
(((((((((((..((((((((..(((((.((((.(((..((.(.(((((((((((.(..((.....))..)))))))))))).).))..))).)))).)))))..))))))))..)))))))))))...((((((((....)))))...(((((((.(((((((..........................))))))).......)))))))..)))............ (-95.77)
..............TCCTGGGTGTCATCGAAACGACC...............................................................................................................................................................................................	fox_23nt_0019329_0000002 + 15
....................................................................................................TGGTGCTCAGGGCCACGCCG............................................................................................................	fox_20nt_0098108_0000001 + 101
....................................................................................................TGGTGCTCAGGGCCACGCCGT...........................................................................................................	fox_21nt_0049169_0000001 + 101
....................................................................................................TGGTGCTCAGGGCCACGCCGTCA.........................................................................................................	fox_23nt_0023877_0000002 + 101
....................................................................................................TGGTGCTCAGGGCCACGCCGTCAATG......................................................................................................	fox_26nt_0036093_0000001 + 101
....................................................................................................TGGTGCTCAGGGCCACGCCGTCAATGAC....................................................................................................	fox_28nt_0032197_0000001 + 101
............................................................................................................AGGGCCACGCCGTCAATGACC...................................................................................................	fox_21nt_0028797_0000002 + 109
..........................................................................................................................AATGACCCTGGATTCATCTGA.....................................................................................	fox_21nt_0017250_0000003 + 123
............................................................................................................................TGACCCTGGATTCATCTGA.....................................................................................	fox_19nt_0010855_0000003 + 125
............................................................................................................................TGACCCTGGATTCATCTGAA....................................................................................	fox_20nt_0034512_0000001 + 125
............................................................................................................................TGACCCTGGATTCATCTGAAT...................................................................................	fox_21nt_0084447_0000001 + 125
............................................................................................................................TGACCCTGGATTCATCTGAATC..................................................................................	fox_22nt_0043844_0000001 + 125

>supercont2.2+_candidate_342_start_3215402_stop_3215606_length_205nt_hairpin_85_188_104nt_mappedmax_3 map_smallRNA_3
AUCUCUCUUGAGUCAGUAGGCCCGAGCCCUCAGAAGACUCAACCCACAGUACUUGUUGUGUGUACAUCUGUUGGAAAAGUCCGGGCUAUUCUUAAGAAGAGGCU
.(((((((((((..(((((.((((..(((.(((((.((.((((...........)))).)).)...))))..))....)..))))))))))))))).))))).. (-30.30)
............................................................................AAGTCCGGGCTATTCTTAAGAAGAGGC.	fox_27nt_0022364_0000001 + 77
...............................................................................TCCGGGCTATTCTTAAGAAGAGGC.	fox_24nt_0031603_0000001 + 80
.................................................................................CGGGCTATTCTTAAGAAGAGGCT	fox_23nt_0032671_0000001 + 82

>supercont2.2+_candidate_351_start_3296767_stop_3297049_length_283nt_hairpin_85_243_159nt_mappedmax_1 map_smallRNA_1
UGAGGUCAAUUAGUGCGGCGCAUGUGGCUAACGCUAAGACAGCCAUGAUCUUCCUGAAAGACAACGUCUUACUUGAGAGGGACUUGAAGUCAGAAGAUAUCAAGCCACGAUUAUUGGGUAUGUGAACAUCGCUCACUUUGGUGCCUAGCUAAUGCUUCA
.(((((..((((((..(((((..((((((...(((.....)))....((((((.(((....(((.((((..(....)..)))))))...)))))))))....))))))......((((((((....))).))))).....)))))..))))))))))). (-51.50)
TGAGGTCAATTAGTGCGGC............................................................................................................................................	fox_19nt_0014688_0000002 + 1

>supercont2.2+_candidate_368_start_3446775_stop_3447027_length_253nt_hairpin_49_233_185nt_mappedmax_3 map_smallRNA_3
GCAGCUACGCCUGGUUCAGAGACGUGGGUGGUGCUAGGUGACGACUCGUAGCAGGUCCGAACUCGGAAUACGCAAACUGCAGUUUUGUGGUUCUGAGCAAAGAUAUAGCGAUGGGAGAGCCUCAUCGUCGGACUGGUCCUCAUUAAACUUGGCGCUGCCUGGGAGUUUCUGAACUAGGGUGAGGC
...(((.((((((((((((((((.((((..(((((((((((.((((.......((((((..((((((((.(((((((....).))))))))))))))..........((((((((.....)))))))))))))))))).)).....)))))))))..))))...)))))))))))).)))).))) (-82.11)
.............................................................................................................................................................CCTGGGAGTTTCTGAACTAGGGTGAGGC	fox_28nt_0043542_0000001 + 158
...............................................................................................................................................................TGGGAGTTTCTGAACTAGG.......	fox_19nt_0053310_0000001 + 160
...................................................................................................................................................................AGTTTCTGAACTAGGGTGAGGC	fox_22nt_0058486_0000001 + 164

>supercont2.2+_candidate_36_start_261434_stop_261778_length_345nt_hairpin_45_200_156nt_mappedmax_2 map_smallRNA_2
AAACUUGGCCCCUCCUGGAUACUGUCCUUCUCGUUUGGAGAAUGAGAAUCGUAACAGAUACGACUCAGACAUGAACAAGAUCAGGCCGCGUGGCCUAAUGGCUAAGGCGCUAGAUUUCGGUCUUCAGCAACUGAUCCCUCUAGAGAUUCCAGGUUC
.(((((((...(((.((((...((((.(((((.....))))).(((..(((((.....)))))))).)))).......(((((((((...(((((....))))).)))(((((((....))))..)))..))))))..)))))))...))))))). (-48.90)
.........................................................................................................................................CTCTAGAGATTCCAGGTT.	fox_18nt_0009809_0000002 + 138
..........................................................................................................................................TCTAGAGATTCCAGGTTC	fox_18nt_0004874_0000006 + 139

>supercont2.2+_candidate_3_start_51310_stop_51539_length_230nt_hairpin_104_219_116nt_mappedmax_1 map_smallRNA_1
ACAAGACAGGAACUUUGACGGAAGAAGGAUUAGAUGUUCUGGGAAUUCGAGUCGUUGAUCGCGACUCAAAGAAAUUCAGUGAGAUUGUGACCGAGCCUCAGAUGCUCCUGGCUGAA
...((.(((((.((((((.((.....((.(((.(..(((..(((.((((((((((.....)))))))...))).)))...)))..).)))))...))))))).).))))).))... (-30.60)
ACAAGACAGGAACTTTGAC.................................................................................................	fox_19nt_0025197_0000001 + 1

>supercont2.2+_candidate_49_start_338517_stop_338742_length_226nt_hairpin_28_184_157nt_mappedmax_2 map_smallRNA_2
GUGGGCUUACGACGAGAUGAACGAGUGAUGUAUAAGUUGGUAGAUGAUAGAGACGCAAGUGCUGCGAGGUGUAAUAAGAGGAACUUUUGACCAAUGAGCAAUACACAUUUGAAUAUUCGCAGGUUCUUAUUCAUUCGCAUUUUGUAUGCGAGCAUAU
....(((..((((((((((..(((((((...(((((................((....)).(((((((((....((((((...)))))))))......(((.......))).....))))))...)))))))))))))))))))).))..))).... (-36.30)
GTGGGCTTACGACGAGATGAACGAGTGA.................................................................................................................................	fox_28nt_0045877_0000001 + 1
....GCTTACGACGAGATGAACGAG....................................................................................................................................	fox_21nt_0046458_0000001 + 5

>supercont2.2+_candidate_68_start_555435_stop_555650_length_216nt_hairpin_50_118_69nt_mappedmax_1 map_smallRNA_1
CUGGUUCUCGGUCUCCUCACAGCUCUCCUGAGCUCCGUCGUCUACUUUGUCGAGCAGAACCUGAACCAG
(((((((..(((((.(((..(((((....)))))..((.....))......))).)).))).))))))) (-22.70)
..................................................CGAGCAGAACCTGAACCAG	fox_19nt_0036597_0000001 + 51

>supercont2.2+_candidate_74_start_583084_stop_583484_length_401nt_hairpin_110_214_105nt_mappedmax_1 map_smallRNA_1
AUCUGCCCGGAUAGUGCUUUGCCUCUUCAGCUAUCACGGUUCCUGGAAAUGAGGAAGAUCACCCCUGCACUUCGGAUCACCCAUCAUUCGCAUUUCCGGGUUGGU
(((.(((((((.(((((....(((((((((..((....))..)))))...))))..((((..............))))...........)))))))))))).))) (-31.24)
ATCTGCCCGGATAGTGCTT......................................................................................	fox_19nt_0080135_0000001 + 1

>supercont2.2+_candidate_76_start_643217_stop_643434_length_218nt_hairpin_53_118_66nt_mappedmax_6 map_smallRNA_6
GUGUUGCUGUGUUAAAUCAUGUGCGACAGCUUUUAUUUGUUGUUUCUAUGAUUUUAUGGUUGUCGC
(((..((((((..((((((((.(.((((((........)))))).)))))))))))))))...))) (-17.00)
........................................TGTTTCTATGATTTTATGGTTGTCGC	fox_26nt_0034437_0000001 + 41
..........................................TTTCTATGATTTTATGGTTGTCGC	fox_24nt_0057436_0000001 + 43
...........................................TTCTATGATTTTATGGTTGTCGC	fox_23nt_0033217_0000001 + 44
.............................................CTATGATTTTATGGTTGTCGC	fox_21nt_0065307_0000001 + 46
...............................................ATGATTTTATGGTTGTCGC	fox_19nt_0022809_0000002 + 48
................................................TGATTTTATGGTTGTCGC	fox_18nt_0014788_0000002 + 49

>supercont2.2+_candidate_89_start_831552_stop_831770_length_219nt_hairpin_78_186_109nt_mappedmax_9 map_smallRNA_0
GGGCAACGUAUUUACGAACUUUUUCCACCGACCAGAAUUCUAUCCGCCACUGUUUCGGUUGCGGCGAUCGGGUCCCGGGGUUGAGUAGAGAUUGGGAUGCGUGAUGCCA
.((((((((((((.(((.(((((((.(((((((.((..((...((((.((((...)))).)))).)))).))))....))).))).)))).)))))))))))..)))). (-36.10)

>supercont2.2-_candidate_102_start_1239624_stop_1239410_length_215nt_hairpin_0_214_215nt_mappedmax_2 map_smallRNA_2
CAUGCAAGCAGCUUGGAGUCUUCGCCAAGGAGGACAUCGCCCCCGGUGAGGUUGUGCUGAAGGAAUACUCACUUCUCACGGCGAACAAUCGUCUGAAGGACUCUAUUUGUGACGCAUGCAGCUCUGAUCUGCCACCACUAGGUAGCGAGAACGAGCCCGUCAGUUGCCCUGAAUGCUACGAUACGGUGUUCUGCACUCAAUAUUGCUUUGAUCAA
(((((..((((..(((((((((((((..((.((......)))).))))).((((((..((((((....)).)))).))))))...............)))))))).))))...)))))......(((((.((.(((....))).))......((((((((..((.((.......)).))...)))).)))).(((........)))...))))). (-63.00)
..................................................................................................GACTCTATTTGTGACGCATGC................................................................................................	fox_21nt_0088665_0000001 + 99
...................................................................................................ACTCTATTTGTGACGCAT..................................................................................................	fox_18nt_0010433_0000002 + 100

>supercont2.2-_candidate_112_start_1307254_stop_1307029_length_226nt_hairpin_89_147_59nt_mappedmax_1 map_smallRNA_1
UGUCCAUCGUCAACUCGAGGCUGUUCUCUCUGAGGGCAAGAUUGAGUUUACUGAGGAUC
.((((.((((.(((((((...(((((((...)))))))...))))))).)).)))))). (-20.10)
TGTCCATCGTCAACTCGAGGC......................................	fox_21nt_0067475_0000001 + 1

>supercont2.2-_candidate_117_start_1394187_stop_1393918_length_270nt_hairpin_39_136_98nt_mappedmax_6 map_smallRNA_6
GCGUCAUCUUGGCUGCCCUGCAUCUUUUUUUUUACUGCGUGUAUCUUACCACAAUGGCGUCGGACGAAGAACGAGAAAGUAGGCCCAGCCGGAGGCGC
(((((.(((.(((((.(((((.((((.((((((.((((((................))).)))..)))))).))))..)))))..))))))))))))) (-31.69)
...........................................................TCGGACGAAGAACGAGAAAGTAGG...............	fox_24nt_0045349_0000001 + 60
............................................................CGGACGAAGAACGAGAAAGTA.................	fox_21nt_0042627_0000001 + 61
............................................................CGGACGAAGAACGAGAAAGTAGG...............	fox_23nt_0043195_0000001 + 61
..................................................................AAGAACGAGAAAGTAGGCCCAGCCGGAGG...	fox_29nt_0049476_0000001 + 67
.....................................................................AACGAGAAAGTAGGCCCAGCCGGAGGCGC	fox_29nt_0030703_0000001 + 70
.........................................................................AGAAAGTAGGCCCAGCCGG......	fox_19nt_0035181_0000001 + 74

>supercont2.2-_candidate_152_start_1735044_stop_1734823_length_222nt_hairpin_51_121_71nt_mappedmax_2 map_smallRNA_2
AGCCUCUGGUCGACGUCAACGCCUGGACCAAGCCCCUCGAGAAGUUCUUUGGCGAGAUCUCAUCAGAGGCC
.(((((((((.((.(((..((((.((((....(.....)....))))...)))).))).))))))))))). (-26.50)
................................................TTGGCGAGATCTCATCAGAGGC.	fox_22nt_0023783_0000002 + 49
................................................TTGGCGAGATCTCATCAGAGGCC	fox_23nt_0037913_0000001 + 49

>supercont2.2-_candidate_182_start_1815554_stop_1815340_length_215nt_hairpin_5_80_76nt_mappedmax_2 map_smallRNA_2
AAGUACCAGAUUCUCUUCAACCGUACUCGACAGGCCGUCAUUACCGGAGAACUGGUUGAGAUUAUCACUGGUGCUA
.((((((((((..(((.(((((((.((((((.....))).......))).)).))))))))..)))..))))))). (-24.01)
AAGTACCAGATTCTCTTC..........................................................	fox_18nt_0013708_0000002 + 1
.......AGATTCTCTTCAACCGTA...................................................	fox_18nt_0035502_0000001 + 8

>supercont2.2-_candidate_195_start_1959068_stop_1958685_length_384nt_hairpin_130_258_129nt_mappedmax_4 map_smallRNA_4
GCAGUACUGCACUUCAUUGAUCAGCGAUGAGACAAGAGGGGAAACGCCAAAAAGAGCGGGAAAUGGCAUGGUAAAAAUCGAUUAUCGUAGCAUUAAAUCGCUUGGGCUGGGUCGGGCAGUGCGUACUGU
(((((((.(((((...(((((((((............(((....).)).....((((((......(((((((((.......))))))).))......))))))..))).))))))..)))))))))))) (-44.30)
GCAGTACTGCACTTCATTGAT............................................................................................................	fox_21nt_0024369_0000002 + 1
.......TGCACTTCATTGATCAGC........................................................................................................	fox_18nt_0050578_0000001 + 8
.......................................................................................................GGGCTGGGTCGGGCAGTG........	fox_18nt_0027810_0000001 + 104
.........................................................................................................GCTGGGTCGGGCAGTGCG......	fox_18nt_0048971_0000001 + 106

>supercont2.2-_candidate_207_start_1971210_stop_1970979_length_232nt_hairpin_68_143_76nt_mappedmax_2 map_smallRNA_2
UGAGGACAUAGACGAUUCAAAUGAAUUUGGUAGUAGCAGACGUAGACCAUGAACAUGAUGAUUUGUUUGUUAUUCA
.(((...((((((((.(((.(((....((((.((.....))....))))....)))..))).))))))))..))). (-16.00)
TGAGGACATAGACGATTCAAAT......................................................	fox_22nt_0070126_0000001 + 1
.GAGGACATAGACGATTCAA........................................................	fox_19nt_0035186_0000001 + 2

>supercont2.2-_candidate_216_start_2035423_stop_2035204_length_220nt_hairpin_101_196_96nt_mappedmax_2 map_smallRNA_2
ACUGGAACAAAGCAAGCGCAGAUCAUCACAGCCAGCACUCACCACGCAAUACAGCAUCACCAAUCACGAUAGCCCUGCCGCUCGUUACUUUCCGGG
.((((((...(((.(((((((..((((...(....).........((......))............))).)..))).)))).)))...)))))). (-20.60)
ACTGGAACAAAGCAAGCGC.............................................................................	fox_19nt_0046826_0000001 + 1
..TGGAACAAAGCAAGCGCAG...........................................................................	fox_19nt_0024850_0000002 + 3

>supercont2.2-_candidate_217_start_2035613_stop_2035363_length_251nt_hairpin_33_225_193nt_mappedmax_1 map_smallRNA_1
UCUUCACUAGUCACUCUCUUUGUUCUUUUUUCUUGAACGACAUCGCUCUUUUUGUACCAUCCCUUCUGAGACGAAUCUGGACGACCAAAAAUUACGACGUUGACGACGACGACUCAACUAGCGCCCCUGUUUGUGUUUGUCGCCAUACAAUUGUCGAUAAUAGUAAUUGGAAACUGAGAUUGAAAAGGAAGGA
(((((.((..(((.((((.((((((.........))))))..(((.(((.(((((..((.......))..)))))...))))))(((...(((((...(((((((((((((((.(((.(((.....))).))).).))))))........))))))))....)))))))).....)))).)))..))))))). (-42.90)
..............................................................................................................................................................................TGAGATTGAAAAGGAAGGA	fox_19nt_0057625_0000001 + 175

>supercont2.2-_candidate_21_start_146632_stop_146413_length_220nt_hairpin_48_193_146nt_mappedmax_2 map_smallRNA_2
UAUUUUUUUUUUUUUUUCUUUCUUUUUUUAUCUGUCCGUUUGGUUUGAUUUUGGUUCUGAUCUGGAUACGGCGGACGAGCACGUUUGAUAGACACGGCCGUCCUAGACACGCGUCAUGUAGAAUGAAUGGAGUAGGAAGAAGAAUG
(((((((((((((.((((.(((...((((((.((..(((...(((((....((((..((.((((...(((((......)).)))....))))))..))))...)))))..))).)).)))))).))).)))).))))))))))))) (-35.80)
..............TTTCTTTCTTTTTTTATCTG................................................................................................................	fox_20nt_0024784_0000002 + 15
...............................................................................................................................TGGAGTAGGAAGAAGAATG	fox_19nt_0079701_0000001 + 128

>supercont2.2-_candidate_221_start_2053661_stop_2053449_length_213nt_hairpin_14_162_149nt_mappedmax_2 map_smallRNA_2
CUGAGCCUGUCCACCAGUUCACCACUCCUCCUCUGGAUGAGCAUCUCUGCCGCAAUAUCGAGCUUGCUCACUACAAGGUUCCCACUCCUGUCCAGAAGUACUCGAUCCCCAUCGUUAUGGGUGGUCGUGAUCUGAUGGCCUGUGCUCAG
(((((((.(.(((.(((.((((.........((((((((((((.(((............)))..)))))......(((........)))))))))).......(((((((((....))))).)))))))).))).))).).).)))))) (-49.40)
CTGAGCCTGTCCACCAGTTC.................................................................................................................................	fox_20nt_0065851_0000001 + 1
...............................................................................................................................TGATCTGATGGCCTGTGCTC..	fox_20nt_0071108_0000001 + 128

>supercont2.2-_candidate_239_start_2313564_stop_2313271_length_294nt_hairpin_99_236_138nt_mappedmax_6 map_smallRNA_7
GGUCGAGUGGUGUAGUGGUUUAUCACGUCUGCCUCACAACGUAUGUGCAAUAGCAAAUACUUGGACGCAGAAGGUCCCGAGUUCAAUCCUCGGUUCGACCUUUCUUUUAACAUUUUUAGAUCCUCCACCAAGUCGAUA
.(((((.(((((.((.((((((.....(((((.((.(((.((((.(((....))).))))))))).))))).(((((((((.......)))))...))))................)))))))).)))))..))))). (-47.00)
GGTCGAGTGGTGTAGTGG........................................................................................................................	fox_18nt_0005705_0000005 + 1
GGTCGAGTGGTGTAGTGGT.......................................................................................................................	fox_19nt_0001900_0000028 + 1
.GTCGAGTGGTGTAGTGGT.......................................................................................................................	fox_18nt_0000593_0000082 + 2
.GTCGAGTGGTGTAGTGGTTTAT...................................................................................................................	fox_22nt_0065295_0000001 + 2
..TCGAGTGGTGTAGTGGTTTATC..................................................................................................................	fox_22nt_0010350_0000004 + 3
...CGAGTGGTGTAGTGGTTTATC..................................................................................................................	fox_21nt_0021860_0000002 + 4
.........GTGTAGTGGTTTATCACG...............................................................................................................	fox_18nt_0006853_0000004 + 10

>supercont2.2-_candidate_251_start_2381877_stop_2381643_length_235nt_hairpin_100_218_119nt_mappedmax_2 map_smallRNA_2
AAACGGUGUAGGAUGUGAAGGGAGAGGAUUAGAGGUGCGGACUUGACUUUGUUUCGAGGCCGCUCGACACGACUUUUCGCUUGUACUCUAGCCACUUCGGUUGGCAUCUAAAACGGUUU
((((.((...((((((.((.((((.((.((((((.((((..(..((..((((.(((((....))))).))))..))..)..)))))))))))).))))..)).))))))...)).)))) (-37.40)
AAACGGTGTAGGATGTGA.....................................................................................................	fox_18nt_0010861_0000002 + 1
........TAGGATGTGAAGGGAGAGG............................................................................................	fox_19nt_0046404_0000001 + 9

>supercont2.2-_candidate_256_start_2488872_stop_2488655_length_218nt_hairpin_92_167_76nt_mappedmax_3 map_smallRNA_3
UUGGAGGUGGAAGCGACUGUGACUGCGAUUGCGCUUUGUGUUCGCUGCUCAUACUCACCGCUCGCUUAGCCUCCCA
..((((((..(((((((.(((((.((((..((((...)))))))).).......)))).).)))))).)))))).. (-28.01)
TTGGAGGTGGAAGCGACTG.........................................................	fox_19nt_0033292_0000001 + 1
.TGGAGGTGGAAGCGACTGTGA......................................................	fox_21nt_0055623_0000001 + 2
....AGGTGGAAGCGACTGTGA......................................................	fox_18nt_0021932_0000001 + 5

>supercont2.2-_candidate_259_start_2541962_stop_2541744_length_219nt_hairpin_94_212_119nt_mappedmax_1 map_smallRNA_1
GUGUCUUGAACAAUUUGAAUAGCAGCUGGCUGCAGAAAUUUAAACAAAAGCAUGGAAUUGGACCAGGCAAGUUGAUGCGGCGGGCUUCAGAGGCAAACAUUCCGGAUAGUGCAAGACUC
..((((((.((.(((((....(.((((.((((((..(((((........((.(((.......))).)))))))..)))))).)))).)...(.....)....))))).)).)))))).. (-33.50)
...................................................................................................TTCCGGATAGTGCAAGACTC	fox_20nt_0075613_0000001 + 100

>supercont2.2-_candidate_279_start_2626590_stop_2626364_length_227nt_hairpin_91_202_112nt_mappedmax_3 map_smallRNA_3
GAAGAUCUUCGCAUUCGGAACGAUCUUCGCAUUGCGUGGCUAGUCUUGGCGAUUAUGAGCCAAGACCUGGGACGCGUAAUGUUUGGCCGAGUAUCCGACUGCGAGGGUAUUC
(((.(((((((((.(((((((...((..((((((((((.(((((((((((........))))))).))))..))))))))))..))....)).))))).))))))))).))) (-54.20)
GAAGATCTTCGCATTCGGAAC...........................................................................................	fox_21nt_0029411_0000002 + 1
GAAGATCTTCGCATTCGGAACG..........................................................................................	fox_22nt_0018522_0000002 + 1
.......................................................................................CGAGTATCCGACTGCGAG.......	fox_18nt_0020291_0000001 + 88

>supercont2.2-_candidate_295_start_2743140_stop_2742859_length_282nt_hairpin_46_117_72nt_mappedmax_1 map_smallRNA_1
CCUGGCACGAUUAUCGUGUAUGGGUCGACCGUAUUCAUGGCCCGACUAAGUGACAUUGUUAGACGGACCAGG
(((((..((.(((..((((...(((((.((((....))))..))))).....))))...))).))..))))) (-23.20)
......................................................ATTGTTAGACGGACCAGG	fox_18nt_0045132_0000001 + 55

>supercont2.2-_candidate_306_start_2761799_stop_2761574_length_226nt_hairpin_27_176_150nt_mappedmax_1 map_smallRNA_1
UCAUCAAGUCUCAGUUUCGGACUUGACAUUCAUGCAAAUGCAGUCCUCCCCGAAAGCUGUUGAACGCCCUAAUGACGAGACACUGCUCUGAGCAAAAGAGCUAAAAAGGGUCCGCGUUUGACAGUUUGUUUUUCGAGGCUGGUUUGGUGU
.(((((((.(.((((((((((...(((.....(((....)))...........(((((((..(((((......(((........(((((.......)))))........))).)))))..)))))))))).)))))))))))))))))). (-47.49)
TCATCAAGTCTCAGTTTCGGA.................................................................................................................................	fox_21nt_0029244_0000002 + 1

>supercont2.2-_candidate_314_start_2825095_stop_2824851_length_245nt_hairpin_13_84_72nt_mappedmax_1 map_smallRNA_1
CUUAUCUUCGCUUCUCAUGUAUAUAUUGAUCUCUUGGCUUAUAUGAUGAUAUAUGGGAGGGCACGAGAUAGG
((((((((.(((((((((((((.((((.................)))))))))))))).)))..)))))))) (-18.73)
CTTATCTTCGCTTCTCAT......................................................	fox_18nt_0009106_0000002 + 1

>supercont2.2-_candidate_315_start_2825252_stop_2825032_length_221nt_hairpin_17_102_86nt_mappedmax_1 map_smallRNA_1
GCUUGUCCCUGGCAGCAGAGCACAGACUAUUUAAUUCAUCGCGAGCCAUUGGAAUCGCAUACGUACACUCCUUUGCAGGACAUGGC
((((((((...((((..(((....((.........))...((((..(....)..)))).........)))..)))).))))).))) (-19.50)
GCTTGTCCCTGGCAGCAGA...................................................................	fox_19nt_0020970_0000002 + 1

>supercont2.2-_candidate_316_start_2825332_stop_2825117_length_216nt_hairpin_97_182_86nt_mappedmax_1 map_smallRNA_1
GCUUGUCCCUGGCAGCAGAGCACAGACUAUUUAAUUCAUCGCGAGCCAUUGGAAUCGCAUACGUACACUCCUUUGCAGGACAUGGC
((((((((...((((..(((....((.........))...((((..(....)..)))).........)))..)))).))))).))) (-19.50)
GCTTGTCCCTGGCAGCAGA...................................................................	fox_19nt_0020970_0000002 + 1

>supercont2.2-_candidate_322_start_2859954_stop_2859734_length_221nt_hairpin_122_196_75nt_mappedmax_2 map_smallRNA_2
GAGCAGGCCGGUGAAGCUAUCGCUAAGGACGAGCAAAAGGAUGCCGUUGCUGAGGACGCUGCCGCCGAGGCUGCC
..((((.((((((.(((..((.((.((((((.(((......))))))).)).)))).)))..))))).).)))). (-28.50)
GAGCAGGCCGGTGAAGCT.........................................................	fox_18nt_0047308_0000001 + 1
.....................................................GGACGCTGCCGCCGAGGCTGC.	fox_21nt_0110297_0000001 + 54

>supercont2.2-_candidate_340_start_3080039_stop_3079819_length_221nt_hairpin_98_191_94nt_mappedmax_1 map_smallRNA_1
CGACAAGGAGUGGUGUAGCGGCAUACGUCCUAGAACCUAUGAAUUCUAAAAUCCGCUCCUAAAAACUCUCUCUCCCGCUACCCACUCCUUGUCU
.((((((((((((.((((((((....)...(((((........)))))..........................))))))))))))))))))). (-34.60)
.........................................................................CCCGCTACCCACTCCTTGTCT	fox_21nt_0066950_0000001 + 74

>supercont2.2-_candidate_341_start_3085447_stop_3085227_length_221nt_hairpin_15_121_107nt_mappedmax_12 map_smallRNA_10
GUACCGAAGAGUGGUGUAGUGGUAUACACUCCUAAACUCCUAUAAUCACCUAAAAAUUCUUCUAUCCGCUCCUAUGGUCAUUCUCCCACUACACCACUCUUCGGUUU
..((((((((((((((((((((........((...........................................))........)))))))))))))))))))).. (-37.62)
..ACCGAAGAGTGGTGTAGTG......................................................................................	fox_19nt_0057885_0000001 + 3
..ACCGAAGAGTGGTGTAGTGG.....................................................................................	fox_20nt_0103096_0000001 + 3
..................................................................................CTCCCACTACACCACTCTTCGGTT.	fox_24nt_0057803_0000001 + 83
...................................................................................TCCCACTACACCACTCTTCGGT..	fox_22nt_0028628_0000002 + 84
...................................................................................TCCCACTACACCACTCTTCGGTT.	fox_23nt_0057859_0000001 + 84
....................................................................................CCCACTACACCACTCTTCGG...	fox_20nt_0020752_0000002 + 85
....................................................................................CCCACTACACCACTCTTCGGT..	fox_21nt_0010381_0000005 + 85
....................................................................................CCCACTACACCACTCTTCGGTT.	fox_22nt_0023267_0000002 + 85
.....................................................................................CCACTACACCACTCTTCGGTT.	fox_21nt_0033831_0000002 + 86
.....................................................................................CCACTACACCACTCTTCGGTTT	fox_22nt_0067220_0000001 + 86

>supercont2.2-_candidate_342_start_3085698_stop_3085478_length_221nt_hairpin_14_121_108nt_mappedmax_12 map_smallRNA_11
AUACCGACGAGUGGUGUAGUGGUAUACGCUCCUAGAUCUCCUAUGAUCACCUAAAAUCUCUAAAAUCCGCUCCUAUAAUCAUUCUCCCACUACACCACUCUUCGGUUU
..(((((.((((((((((((((............((((......))))...((.......))........................)))))))))))))).))))).. (-35.60)
.TACCGACGAGTGGTGTAGTGGT.....................................................................................	fox_22nt_0051364_0000001 + 2
..ACCGACGAGTGGTGTAGTGGT.....................................................................................	fox_21nt_0082758_0000001 + 3
....CGACGAGTGGTGTAGTGGT.....................................................................................	fox_19nt_0031620_0000001 + 5
...................................................................................CTCCCACTACACCACTCTTCGGTT.	fox_24nt_0057803_0000001 + 84
....................................................................................TCCCACTACACCACTCTTCGGT..	fox_22nt_0028628_0000002 + 85
....................................................................................TCCCACTACACCACTCTTCGGTT.	fox_23nt_0057859_0000001 + 85
.....................................................................................CCCACTACACCACTCTTCGG...	fox_20nt_0020752_0000002 + 86
.....................................................................................CCCACTACACCACTCTTCGGT..	fox_21nt_0010381_0000005 + 86
.....................................................................................CCCACTACACCACTCTTCGGTT.	fox_22nt_0023267_0000002 + 86
......................................................................................CCACTACACCACTCTTCGGTT.	fox_21nt_0033831_0000002 + 87
......................................................................................CCACTACACCACTCTTCGGTTT	fox_22nt_0067220_0000001 + 87

>supercont2.2-_candidate_344_start_3109990_stop_3109640_length_351nt_hairpin_97_270_174nt_mappedmax_96 map_smallRNA_96
CAUGGACAUGUUUGAGGAGCUUGUGAGUAUGGGGGACGCCAUGUUCUGUGUUGAGAAGCUAAGUUAUGUGUUGUAUCUUACUUACCUCGGGUAACUAAGGACCACGCAUAACUUAGCUUCUCAGCACAGCACAUGGCGUCCCCCAUAGUCAUAAGCUCAACGAGCGUGUUCAUG
((((((((((((((..((((((((((.(((((((((((((((((.((((((((((((((((((((((((((.((.(((((.(((((...))))).))))))).)))))))))))))))))))))))))).))))))))))))))))).))))))))))..)))))))))))))) (-128.80)
..TGGACATGTTTGAGGAGCTT........................................................................................................................................................	fox_20nt_0047315_0000001 + 3
..TGGACATGTTTGAGGAGCTTG.......................................................................................................................................................	fox_21nt_0015127_0000004 + 3
..TGGACATGTTTGAGGAGCTTGT......................................................................................................................................................	fox_22nt_0012675_0000003 + 3
..................GCTTGTGAGTATGGGGGACG........................................................................................................................................	fox_20nt_0043126_0000001 + 19
....................TTGTGAGTATGGGGGACG........................................................................................................................................	fox_18nt_0014230_0000002 + 21
....................TTGTGAGTATGGGGGACGC.......................................................................................................................................	fox_19nt_0006408_0000006 + 21
....................TTGTGAGTATGGGGGACGCCA.....................................................................................................................................	fox_21nt_0033370_0000002 + 21
.....................TGTGAGTATGGGGGACGC.......................................................................................................................................	fox_18nt_0005019_0000005 + 22
.....................TGTGAGTATGGGGGACGCCA.....................................................................................................................................	fox_20nt_0010475_0000005 + 22
.....................TGTGAGTATGGGGGACGCCAT....................................................................................................................................	fox_21nt_0046118_0000001 + 22
.....................TGTGAGTATGGGGGACGCCATG...................................................................................................................................	fox_22nt_0006683_0000008 + 22
.....................TGTGAGTATGGGGGACGCCATGT..................................................................................................................................	fox_23nt_0014564_0000002 + 22
.......................TGAGTATGGGGGACGCCAT....................................................................................................................................	fox_19nt_0025681_0000001 + 24
.......................TGAGTATGGGGGACGCCATG...................................................................................................................................	fox_20nt_0008951_0000006 + 24
.......................TGAGTATGGGGGACGCCATGT..................................................................................................................................	fox_21nt_0006571_0000009 + 24
...........................TATGGGGGACGCCATGTTCT...............................................................................................................................	fox_20nt_0040237_0000001 + 28
...........................TATGGGGGACGCCATGTTCTG..............................................................................................................................	fox_21nt_0012137_0000005 + 28
.............................TGGGGGACGCCATGTTCTGTG............................................................................................................................	fox_21nt_0012772_0000004 + 30
.............................TGGGGGACGCCATGTTCTGTGTT..........................................................................................................................	fox_23nt_0045879_0000001 + 30
...................................ACGCCATGTTCTGTGTTGA........................................................................................................................	fox_19nt_0019213_0000002 + 36
...................................ACGCCATGTTCTGTGTTGAGAAGC...................................................................................................................	fox_24nt_0004104_0000008 + 36
....................................CGCCATGTTCTGTGTTGA........................................................................................................................	fox_18nt_0013461_0000002 + 37
....................................CGCCATGTTCTGTGTTGAGA......................................................................................................................	fox_20nt_0028492_0000002 + 37
....................................CGCCATGTTCTGTGTTGAGAAG....................................................................................................................	fox_22nt_0086930_0000001 + 37
....................................CGCCATGTTCTGTGTTGAGAAGC...................................................................................................................	fox_23nt_0003133_0000015 + 37
....................................CGCCATGTTCTGTGTTGAGAAGCT..................................................................................................................	fox_24nt_0034366_0000001 + 37
.....................................GCCATGTTCTGTGTTGAGAAGC...................................................................................................................	fox_22nt_0026490_0000002 + 38
......................................CCATGTTCTGTGTTGAGAAGC...................................................................................................................	fox_21nt_0103228_0000001 + 39
.......................................CATGTTCTGTGTTGAGAAGC...................................................................................................................	fox_20nt_0086587_0000001 + 40
........................................ATGTTCTGTGTTGAGAAGC...................................................................................................................	fox_19nt_0003151_0000015 + 41
.........................................TGTTCTGTGTTGAGAAGC...................................................................................................................	fox_18nt_0001981_0000018 + 42
.........................................TGTTCTGTGTTGAGAAGCT..................................................................................................................	fox_19nt_0006924_0000006 + 42
.........................................TGTTCTGTGTTGAGAAGCTA.................................................................................................................	fox_20nt_0017525_0000003 + 42
.........................................TGTTCTGTGTTGAGAAGCTAA................................................................................................................	fox_21nt_0060108_0000001 + 42
.........................................TGTTCTGTGTTGAGAAGCTAAG...............................................................................................................	fox_22nt_0006165_0000008 + 42
...........................................TTCTGTGTTGAGAAGCTAAG...............................................................................................................	fox_20nt_0031427_0000002 + 44
...........................................TTCTGTGTTGAGAAGCTAAGT..............................................................................................................	fox_21nt_0011280_0000005 + 44
...........................................TTCTGTGTTGAGAAGCTAAGTT.............................................................................................................	fox_22nt_0007387_0000007 + 44
...........................................TTCTGTGTTGAGAAGCTAAGTTA............................................................................................................	fox_23nt_0002966_0000016 + 44
............................................TCTGTGTTGAGAAGCTAAG...............................................................................................................	fox_19nt_0010383_0000003 + 45
............................................TCTGTGTTGAGAAGCTAAGT..............................................................................................................	fox_20nt_0008795_0000006 + 45
............................................TCTGTGTTGAGAAGCTAAGTT.............................................................................................................	fox_21nt_0003290_0000022 + 45
............................................TCTGTGTTGAGAAGCTAAGTTA............................................................................................................	fox_22nt_0001019_0000072 + 45
............................................TCTGTGTTGAGAAGCTAAGTTAT...........................................................................................................	fox_23nt_0061675_0000001 + 45
.............................................CTGTGTTGAGAAGCTAAGTTA............................................................................................................	fox_21nt_0060329_0000001 + 46
..............................................TGTGTTGAGAAGCTAAGT..............................................................................................................	fox_18nt_0004579_0000006 + 47
..............................................TGTGTTGAGAAGCTAAGTT.............................................................................................................	fox_19nt_0003116_0000016 + 47
..............................................TGTGTTGAGAAGCTAAGTTA............................................................................................................	fox_20nt_0000651_0000116 + 47
...............................................................................................TAAGGACCACGCATAACTTAGC.........................................................	fox_22nt_0047423_0000001 + 96
............................................................................................................TAACTTAGCTTCTCAGCACAGC............................................	fox_22nt_0017039_0000003 + 109
.............................................................................................................AACTTAGCTTCTCAGCACAGCACATGGC.....................................	fox_28nt_0029751_0000001 + 110
..............................................................................................................ACTTAGCTTCTCAGCACAG.............................................	fox_19nt_0004279_0000010 + 111
..............................................................................................................ACTTAGCTTCTCAGCACAGC............................................	fox_20nt_0000785_0000093 + 111
..............................................................................................................ACTTAGCTTCTCAGCACAGCA...........................................	fox_21nt_0002331_0000032 + 111
..............................................................................................................ACTTAGCTTCTCAGCACAGCAC..........................................	fox_22nt_0046307_0000001 + 111
..............................................................................................................ACTTAGCTTCTCAGCACAGCACA.........................................	fox_23nt_0013359_0000002 + 111
..............................................................................................................ACTTAGCTTCTCAGCACAGCACATGGC.....................................	fox_27nt_0015404_0000002 + 111
..............................................................................................................ACTTAGCTTCTCAGCACAGCACATGGCG....................................	fox_28nt_0024265_0000001 + 111
..............................................................................................................ACTTAGCTTCTCAGCACAGCACATGGCGT...................................	fox_29nt_0002016_0000021 + 111
..............................................................................................................ACTTAGCTTCTCAGCACAGCACATGGCGTC..................................	fox_30nt_0004016_0000008 + 111
................................................................................................................TTAGCTTCTCAGCACAGCA...........................................	fox_19nt_0004713_0000009 + 113
................................................................................................................TTAGCTTCTCAGCACAGCACATGGC.....................................	fox_25nt_0042531_0000001 + 113
....................................................................................................................CTTCTCAGCACAGCACATG.......................................	fox_19nt_0020530_0000002 + 117
....................................................................................................................CTTCTCAGCACAGCACATGG......................................	fox_20nt_0028305_0000002 + 117
....................................................................................................................CTTCTCAGCACAGCACATGGC.....................................	fox_21nt_0111324_0000001 + 117
....................................................................................................................CTTCTCAGCACAGCACATGGCG....................................	fox_22nt_0018763_0000002 + 117
....................................................................................................................CTTCTCAGCACAGCACATGGCGT...................................	fox_23nt_0003258_0000015 + 117
....................................................................................................................CTTCTCAGCACAGCACATGGCGTC..................................	fox_24nt_0004734_0000007 + 117
....................................................................................................................CTTCTCAGCACAGCACATGGCGTCC.................................	fox_25nt_0006837_0000004 + 117
.....................................................................................................................TTCTCAGCACAGCACATGG......................................	fox_19nt_0002136_0000025 + 118
.....................................................................................................................TTCTCAGCACAGCACATGGC.....................................	fox_20nt_0002639_0000023 + 118
.....................................................................................................................TTCTCAGCACAGCACATGGCG....................................	fox_21nt_0002418_0000030 + 118
.....................................................................................................................TTCTCAGCACAGCACATGGCGT...................................	fox_22nt_0001284_0000056 + 118
.....................................................................................................................TTCTCAGCACAGCACATGGCGTC..................................	fox_23nt_0002651_0000019 + 118
.....................................................................................................................TTCTCAGCACAGCACATGGCGTCC.................................	fox_24nt_0005043_0000006 + 118
......................................................................................................................TCTCAGCACAGCACATGGCG....................................	fox_20nt_0104871_0000001 + 119
......................................................................................................................TCTCAGCACAGCACATGGCGT...................................	fox_21nt_0008989_0000006 + 119
......................................................................................................................TCTCAGCACAGCACATGGCGTC..................................	fox_22nt_0012234_0000004 + 119
.......................................................................................................................CTCAGCACAGCACATGGCGTC..................................	fox_21nt_0075976_0000001 + 120
........................................................................................................................TCAGCACAGCACATGGCGTC..................................	fox_20nt_0022099_0000002 + 121
........................................................................................................................TCAGCACAGCACATGGCGTCC.................................	fox_21nt_0009043_0000006 + 121
........................................................................................................................TCAGCACAGCACATGGCGTCCCCC..............................	fox_24nt_0017006_0000002 + 121
........................................................................................................................TCAGCACAGCACATGGCGTCCCCCA.............................	fox_25nt_0040447_0000001 + 121
.........................................................................................................................CAGCACAGCACATGGCGTC..................................	fox_19nt_0035028_0000001 + 122
...........................................................................................................................GCACAGCACATGGCGTCCCCCAT............................	fox_23nt_0019084_0000002 + 124
.............................................................................................................................ACAGCACATGGCGTCCCCCAT............................	fox_21nt_0027804_0000002 + 126
................................................................................................................................GCACATGGCGTCCCCCAT............................	fox_18nt_0022840_0000001 + 129
................................................................................................................................GCACATGGCGTCCCCCATA...........................	fox_19nt_0075633_0000001 + 129
....................................................................................................................................ATGGCGTCCCCCATAGTCATA.....................	fox_21nt_0063224_0000001 + 133
....................................................................................................................................ATGGCGTCCCCCATAGTCATAA....................	fox_22nt_0058592_0000001 + 133
.....................................................................................................................................TGGCGTCCCCCATAGTCATA.....................	fox_20nt_0016894_0000003 + 134
.....................................................................................................................................TGGCGTCCCCCATAGTCATAAGCTC................	fox_25nt_0018865_0000001 + 134
.......................................................................................................................................GCGTCCCCCATAGTCATAAG...................	fox_20nt_0100995_0000001 + 136
.......................................................................................................................................GCGTCCCCCATAGTCATAAGC..................	fox_21nt_0045739_0000001 + 136
........................................................................................................................................CGTCCCCCATAGTCATAAGCT.................	fox_21nt_0056494_0000001 + 137
........................................................................................................................................................AAGCTCAACGAGCGTGTTCATG	fox_22nt_0058324_0000001 + 153

>supercont2.2-_candidate_351_start_3186013_stop_3185786_length_228nt_hairpin_92_216_125nt_mappedmax_5 map_smallRNA_5
AAUAGGUGCAGGACACGUGAAAGACAAAGAACAGUAAAUGUGCGGGUGCGUUUGAUGGGAUUUGGAUCUCAUUUGUGAUUGACGAUGGCCGAUUGUUAUGUAUUUUUAUGAUUGCUAGCCCUAAU
..((((.((.((.(((((((((((((...((((((.......(((.((((((.((((((((....)))))))).......)))).)).))))))))).))).))))))))..)))).)))))).. (-30.21)
AATAGGTGCAGGACACGTGAAAGA.....................................................................................................	fox_24nt_0033888_0000001 + 1
.......GCAGGACACGTGAAAGACA...................................................................................................	fox_19nt_0059752_0000001 + 8
........CAGGACACGTGAAAGACA...................................................................................................	fox_18nt_0028223_0000001 + 9
..............ACGTGAAAGACAAAGAAC.............................................................................................	fox_18nt_0041273_0000001 + 15
...............CGTGAAAGACAAAGAACA............................................................................................	fox_18nt_0021304_0000001 + 16

>supercont2.2-_candidate_354_start_3187958_stop_3187732_length_227nt_hairpin_113_189_77nt_mappedmax_2 map_smallRNA_2
AACAGAACUUGGAAGACUUUGUCGCUUCCAUUGCCGAGCCCGUUAAGGAGGAAGCAUCCGAAGUUGCCGAGUCUGCC
..((((.(((((..(((((((..((((((.(((.((....)).)))...))))))...))))))).))))))))).. (-27.30)
AACAGAACTTGGAAGACTT..........................................................	fox_19nt_0025807_0000001 + 1
.ACAGAACTTGGAAGACTTTGT.......................................................	fox_21nt_0073080_0000001 + 2

>supercont2.2-_candidate_358_start_3188489_stop_3188219_length_271nt_hairpin_184_254_71nt_mappedmax_2 map_smallRNA_2
GCCGAUGUACAUUUCCAGGUUCUUGACGAGACUAGAAACCUCGCCUUGCAACAGAUCGGAAUGAGGUGGGC
(((.((.(.((((.((.((((.(((.((((.(.((....)).).)))))))..))))))))))).)).))) (-17.10)
.................................................AACAGATCGGAATGAGGTGGGC	fox_22nt_0043964_0000001 + 50
....................................................AGATCGGAATGAGGTGGGC	fox_19nt_0049066_0000001 + 53

>supercont2.2-_candidate_361_start_3189174_stop_3188971_length_204nt_hairpin_85_172_88nt_mappedmax_1 map_smallRNA_1
ACAGCUUACUGGACGUGGAACAAGACUUAUGCCUUCCUUGACAGCAACGUUUGCCUCACGUCCGCGCCGUCUACGUCCAGAACGUUGA
.((((...(((((((((((.((((............))))...((.((((.......))))..))....)))))))))))...)))). (-27.70)
ACAGCTTACTGGACGTGGA.....................................................................	fox_19nt_0054954_0000001 + 1

>supercont2.2-_candidate_365_start_3229930_stop_3229700_length_231nt_hairpin_24_83_60nt_mappedmax_1 map_smallRNA_1
ACGCAAUGGGUGCUAACUCGCAAGCUUUCACUGGUGAACUUGCAGAUGGCACCUUUGCGC
.(((((.((((((((.((.(((((..((((....))))))))))).))))))))))))). (-28.50)
ACGCAATGGGTGCTAACTCGCAAGCT..................................	fox_26nt_0016240_0000001 + 1

>supercont2.2-_candidate_36_start_433997_stop_433778_length_220nt_hairpin_102_164_63nt_mappedmax_2 map_smallRNA_2
AGACUAUGUCGAAUCGGCACAAAGGUAUUCGAAUGAGUACAUCGGCCUAUAUUGAUAUAUUCU
(((.((((((((((.(((......((((((....))))))....))).)).)))))))).))) (-18.10)
AGACTATGTCGAATCGGC.............................................	fox_18nt_0052598_0000001 + 1
AGACTATGTCGAATCGGCA............................................	fox_19nt_0061169_0000001 + 1

>supercont2.2-_candidate_370_start_3231539_stop_3231337_length_203nt_hairpin_43_108_66nt_mappedmax_1 map_smallRNA_1
UCGAACAGGGCGUUCCUUGUGUUCUUGCGGCGGGGAACGCAGGGGCUACGGGAAUGUUUUAUGCGA
(((...(((((((((((.(((((((((((........))))))))).)))))))))))))...))) (-28.30)
.......................................CAGGGGCTACGGGAATGTTTTATGCGA	fox_27nt_0011646_0000002 + 40

>supercont2.2-_candidate_388_start_3462548_stop_3462313_length_236nt_hairpin_48_129_82nt_mappedmax_1 map_smallRNA_1
AAGCCUGGUUUUACGCGUGUCACGAAUGUCUCCCGAGGCGUAUGCCUAAACGAUGACUUGAUUGAAUGCGAAGACUGUGUAA
..((.(((((((.(((((.(((.....(((((...((((....))))....)).))).....))))))))))))))).)).. (-22.30)
................................................................AATGCGAAGACTGTGTAA	fox_18nt_0022467_0000001 + 65

>supercont2.2-_candidate_407_start_3497244_stop_3497016_length_229nt_hairpin_0_228_229nt_mappedmax_1 map_smallRNA_1
UGUCUUCCACCACUCUCAGCACCGCCAGCGCCGUCCCCACGGCCUGCACAAACCUCUAUGACACCCCCAACCAGGACAACACCUGCGCCAUGCCCUUCAAGGACAACCACACCGAGAUCAUGCAGAAGUGCUGCGGUGAUGCCAAGAUCGUGAGCUACUACAACGGCUGCGGCCUCUACUGCGUCGCCCUCGACCAGACCAUCGGCGAGCUCGCAAAGUGCCUCUUCUC
.(((((.((.(((.(.((((((.......(((((....)))))(((((.....(((..((...........((((......)))).....((.((.....)).))....))..)))....)))))..)))))).)))).))..))))).(((((((....(...(((....)))....(((.((((....)))))))......)...)))))))............... (-60.70)
...................................................................................................................................TGCGGTGATGCCAAGATC................................................................................	fox_18nt_0028616_0000001 + 132

>supercont2.2-_candidate_410_start_3613211_stop_3612987_length_225nt_hairpin_60_129_70nt_mappedmax_2 map_smallRNA_2
GUCCGUGGUGAUUUCUAAUGCUCAGUCCCUGGGUGCCGUGGACAUGAUCGAUUGGAAUUCUAUUUUGGGC
(((((..((((.((((((((.(((((((.(((...))).)))).))).).))))))).)).))..))))) (-23.10)
..............................................ATCGATTGGAATTCTATTTT....	fox_20nt_0103176_0000001 + 47
...................................................TTGGAATTCTATTTTGGGC	fox_19nt_0047520_0000001 + 52

>supercont2.2-_candidate_413_start_4017500_stop_4017290_length_211nt_hairpin_54_110_57nt_mappedmax_11 map_smallRNA_11
AUAAAAAUUCUUUCUUGGCACGCACUGUUAGUGCAAUGCUAGGAGCGGGAUUUUCUA
...(((((((((((((((((.((((.....))))..))))))))).))))))))... (-20.30)
.TAAAAATTCTTTCTTGGC......................................	fox_18nt_0005867_0000004 + 2
.TAAAAATTCTTTCTTGGCA.....................................	fox_19nt_0017049_0000002 + 2
.TAAAAATTCTTTCTTGGCACG...................................	fox_21nt_0017880_0000003 + 2
.TAAAAATTCTTTCTTGGCACGC..................................	fox_22nt_0026350_0000002 + 2
.TAAAAATTCTTTCTTGGCACGCA.................................	fox_23nt_0007333_0000005 + 2
....................................TGCTAGGAGCGGGATTTTCT.	fox_20nt_0107708_0000001 + 37
....................................TGCTAGGAGCGGGATTTTCTA	fox_21nt_0045754_0000001 + 37
.....................................GCTAGGAGCGGGATTTTCT.	fox_19nt_0053419_0000001 + 38
......................................CTAGGAGCGGGATTTTCT.	fox_18nt_0009038_0000003 + 39
......................................CTAGGAGCGGGATTTTCTA	fox_19nt_0006277_0000006 + 39
.......................................TAGGAGCGGGATTTTCTA	fox_18nt_0002491_0000014 + 40

>supercont2.2-_candidate_50_start_568645_stop_568435_length_211nt_hairpin_92_155_64nt_mappedmax_4 map_smallRNA_3
AUUAAGGAACGGAGCAGACCUGGCGACGCGGCAUUGCAUUUCGGCAGGAGUUGUGUUUUUGGAG
....(((((((.(((...((((.(((.(((....)))...))).)))).))).))))))).... (-18.40)
ATTAAGGAACGGAGCAGACC............................................	fox_20nt_0060418_0000001 + 1
.TTAAGGAACGGAGCAGAC.............................................	fox_18nt_0007612_0000003 + 2
.TTAAGGAACGGAGCAGACC............................................	fox_19nt_0061939_0000001 + 2

>supercont2.2-_candidate_57_start_648425_stop_648199_length_227nt_hairpin_20_159_140nt_mappedmax_1 map_smallRNA_1
AACCCUUACGCCUCCGUGUUUGCCCAGGAGGCUCAGAAGAAGCAGAACUAAAAUAAUUCUCGACUUGCUGGGUGUGCAGCGGGUUAAGACGGAACUAGAUGACGGGUCUUGCAUGGUUUGAUAUUGAGGCGUAAUGGCUU
..((.(((((((((.(((((...(((.(((((((......((.....))........(((..((((((((......))))))))..)))..............)))))))...)))...))))).))))))))).))... (-47.00)
......................................................................................................................TGATATTGAGGCGTAATGGCTT	fox_22nt_0075406_0000001 + 119

>supercont2.2-_candidate_58_start_648965_stop_648743_length_223nt_hairpin_32_143_112nt_mappedmax_1 map_smallRNA_1
GCUGCCAUUGCCAAGACCGCUGCUGCUUUCGGCCUCUUGAAGGCUGUUGGCGCUGGUGCCGAUAUUGAGAAGGUCAAGAACUCCAAGAAGCUCCGUGCUGGUAAGGGCAAGC
((((((.((((((.(..((..(((.((((((((((((..(....((((((((....)))))))))..)).)))))..)).....))).)))..))..))))))).))).))) (-39.20)
...........................................................................................TCCGTGCTGGTAAGGGCAAGC	fox_21nt_0085095_0000001 + 92

>supercont2.2-_candidate_5_start_18342_stop_18119_length_224nt_hairpin_56_143_88nt_mappedmax_1 map_smallRNA_1
CGCGUCCGGGAGGGAGUUGCUAGCAAGGUUGUGCAUGCUGUAGAGGUUGCAAGAUUUGAAGAUGUAGAGUGACUGACACUGGAUAGUG
(((((((((..(..(((..((.((((((((.((((.(((.....))))))).))))).....)))..))..)))..).)))))).))) (-24.90)
.....................................................................TGACTGACACTGGATAGTG	fox_19nt_0043456_0000001 + 70

>supercont2.2-_candidate_66_start_746476_stop_746258_length_219nt_hairpin_118_195_78nt_mappedmax_1 map_smallRNA_1
CGAAUAUGCUGUGUACCCCAUCGGCUGGCGACGCCUUCAAUUCAGGAUGUAAGUCAUUGGCUGCACUGGCAACAUUCG
(((((.(((((((((..(((..((((.(((...(((.......))).))).))))..))).))))).))))..))))) (-22.50)
CGAATATGCTGTGTACCCCATCGGCT....................................................	fox_26nt_0039678_0000001 + 1

>supercont2.2-_candidate_68_start_769849_stop_769465_length_385nt_hairpin_105_337_233nt_mappedmax_1 map_smallRNA_1
GUUGGCGACAAGAUCGAUGAGAGCACCCAUGGAGCUAAGGGAGAGGCCUACAAGCAGAACCCAUAGAUGCUUCUUAACUGAGAAAUGAGGAGGAUAUGACACUGUGGGGGACUCGGGCCAUAUCUCGUUCACGAGACUUCCCGUACCCUCCAUAUUGAGCACUUAGAUACCCAAGUUCGGUAGCUCUUCAAUCAAUCUAUUGCACACCAGCUCUUCCCUAUCUUGUUGUGAUU
..(.((((((((((.(..((((((....((((((....(((((.(((((...(((....(((((((.(((.((((..((.(....).)).))))...).))))))))).).)).)))))...(((((....))))).))))).....)))))).....(((..((((((((.......)))).............)))).)))......))))))..).)))))))))).).. (-73.81)
GTTGGCGACAAGATCGATGAGA...................................................................................................................................................................................................................	fox_22nt_0063197_0000001 + 1

>supercont2.2-_candidate_69_start_769956_stop_769730_length_227nt_hairpin_34_116_83nt_mappedmax_1 map_smallRNA_1
GAUGUAAGUCCAAGGACAGAACUUGCUUGUAAAGUAAUUACAUGUGACUAAUUUGCUUUCAAGGUUGCCAAGGACUCCAACGC
......(((((..((.(((..((((...(((((.((.(((....))).)).)))))...)))).)))))..)))))....... (-16.90)
.................................................................TGCCAAGGACTCCAACGC	fox_18nt_0016064_0000001 + 66

>supercont2.2-_candidate_82_start_855278_stop_854982_length_297nt_hairpin_96_187_92nt_mappedmax_64 map_smallRNA_63
UAGGACAACGUGGCCGAGUGGUUAAGGCGAUGCCCUGCUAUCUCUUCGAGACAUCAUAGGCAUUGUGUUCGCACGCGUAGGUUCGAAUCCUG
(((((...((.((((..(((((.((.((((((((.((...((((...))))...))..)))))))).)).)).)))...))))))..))))) (-29.50)
...GACAACGTGGCCGAGTGG.......................................................................	fox_18nt_0000774_0000060 + 4
...GACAACGTGGCCGAGTGGT......................................................................	fox_19nt_0002273_0000023 + 4
........CGTGGCCGAGTGGTTAAG..................................................................	fox_18nt_0042496_0000001 + 9
........CGTGGCCGAGTGGTTAAGGC................................................................	fox_20nt_0100696_0000001 + 9
.....................................................TCATAGGCATTGTGTTCGCA...................	fox_20nt_0048318_0000001 + 54
........................................................TAGGCATTGTGTTCGCACGC................	fox_20nt_0018196_0000003 + 57
.........................................................AGGCATTGTGTTCGCACG.................	fox_18nt_0012290_0000002 + 58
.........................................................AGGCATTGTGTTCGCACGC................	fox_19nt_0002832_0000017 + 58
.........................................................AGGCATTGTGTTCGCACGCG...............	fox_20nt_0012655_0000004 + 58
..........................................................GGCATTGTGTTCGCACGC................	fox_18nt_0001549_0000025 + 59
..........................................................GGCATTGTGTTCGCACGCG...............	fox_19nt_0002664_0000019 + 59
..........................................................GGCATTGTGTTCGCACGCGT..............	fox_20nt_0010941_0000004 + 59
..........................................................GGCATTGTGTTCGCACGCGTA.............	fox_21nt_0007690_0000008 + 59
..........................................................GGCATTGTGTTCGCACGCGTAG............	fox_22nt_0005489_0000010 + 59
..........................................................GGCATTGTGTTCGCACGCGTAGG...........	fox_23nt_0009176_0000004 + 59
..........................................................GGCATTGTGTTCGCACGCGTAGGT..........	fox_24nt_0011548_0000002 + 59
...........................................................GCATTGTGTTCGCACGCG...............	fox_18nt_0007870_0000003 + 60
...........................................................GCATTGTGTTCGCACGCGT..............	fox_19nt_0075507_0000001 + 60
...........................................................GCATTGTGTTCGCACGCGTA.............	fox_20nt_0016427_0000003 + 60
...........................................................GCATTGTGTTCGCACGCGTAG............	fox_21nt_0061105_0000001 + 60
...........................................................GCATTGTGTTCGCACGCGTAGG...........	fox_22nt_0014115_0000003 + 60
...........................................................GCATTGTGTTCGCACGCGTAGGT..........	fox_23nt_0014938_0000002 + 60
...........................................................GCATTGTGTTCGCACGCGTAGGTTC........	fox_25nt_0010003_0000002 + 60
............................................................CATTGTGTTCGCACGCGT..............	fox_18nt_0029581_0000001 + 61
............................................................CATTGTGTTCGCACGCGTAG............	fox_20nt_0015263_0000003 + 61
............................................................CATTGTGTTCGCACGCGTAGG...........	fox_21nt_0011200_0000005 + 61
............................................................CATTGTGTTCGCACGCGTAGGT..........	fox_22nt_0038712_0000001 + 61
............................................................CATTGTGTTCGCACGCGTAGGTTC........	fox_24nt_0004347_0000008 + 61
............................................................CATTGTGTTCGCACGCGTAGGTTCG.......	fox_25nt_0006307_0000004 + 61
.............................................................ATTGTGTTCGCACGCGTAG............	fox_19nt_0037440_0000001 + 62
.............................................................ATTGTGTTCGCACGCGTAGG...........	fox_20nt_0009357_0000005 + 62
.............................................................ATTGTGTTCGCACGCGTAGGT..........	fox_21nt_0020859_0000003 + 62
.............................................................ATTGTGTTCGCACGCGTAGGTT.........	fox_22nt_0064709_0000001 + 62
.............................................................ATTGTGTTCGCACGCGTAGGTTC........	fox_23nt_0004947_0000008 + 62
.............................................................ATTGTGTTCGCACGCGTAGGTTCG.......	fox_24nt_0004751_0000007 + 62
..............................................................TTGTGTTCGCACGCGTAG............	fox_18nt_0006330_0000004 + 63
..............................................................TTGTGTTCGCACGCGTAGG...........	fox_19nt_0008752_0000004 + 63
..............................................................TTGTGTTCGCACGCGTAGGT..........	fox_20nt_0081238_0000001 + 63
..............................................................TTGTGTTCGCACGCGTAGGTTC........	fox_22nt_0010092_0000005 + 63
..............................................................TTGTGTTCGCACGCGTAGGTTCG.......	fox_23nt_0002269_0000023 + 63
...............................................................TGTGTTCGCACGCGTAGG...........	fox_18nt_0003806_0000008 + 64
...............................................................TGTGTTCGCACGCGTAGGT..........	fox_19nt_0002727_0000018 + 64
...............................................................TGTGTTCGCACGCGTAGGTT.........	fox_20nt_0007933_0000006 + 64
...............................................................TGTGTTCGCACGCGTAGGTTC........	fox_21nt_0001848_0000041 + 64
...............................................................TGTGTTCGCACGCGTAGGTTCG.......	fox_22nt_0002384_0000027 + 64
................................................................GTGTTCGCACGCGTAGGTTC........	fox_20nt_0018689_0000002 + 65
................................................................GTGTTCGCACGCGTAGGTTCG.......	fox_21nt_0040497_0000001 + 65
.................................................................TGTTCGCACGCGTAGGTT.........	fox_18nt_0006559_0000004 + 66
.................................................................TGTTCGCACGCGTAGGTTC........	fox_19nt_0002480_0000021 + 66
.................................................................TGTTCGCACGCGTAGGTTCG.......	fox_20nt_0002812_0000022 + 66
..................................................................GTTCGCACGCGTAGGTTC........	fox_18nt_0002712_0000012 + 67
..................................................................GTTCGCACGCGTAGGTTCG.......	fox_19nt_0002160_0000024 + 67
...................................................................TTCGCACGCGTAGGTTCG.......	fox_18nt_0000760_0000061 + 68
......................................................................GCACGCGTAGGTTCGAATC...	fox_19nt_0010264_0000003 + 71
......................................................................GCACGCGTAGGTTCGAATCC..	fox_20nt_0019657_0000002 + 71
.......................................................................CACGCGTAGGTTCGAATC...	fox_18nt_0005241_0000005 + 72
.......................................................................CACGCGTAGGTTCGAATCC..	fox_19nt_0005347_0000008 + 72
.......................................................................CACGCGTAGGTTCGAATCCT.	fox_20nt_0006934_0000008 + 72
[truncated: 670,127 more chars]
